# Supplementary material
Source: bioRxiv or medRxiv preprint supplement (https://www.biorxiv.org/highwire/filestream/113612/field_highwire_adjunct_files/4/374553-5.pdf)
Supplement: Supplementary file [file 374553-5.pdf]

**Table S4.** Canonical Pathways gene-set analysis of the GWAS meta-analysis of cocaine dependence

#MEAN\_SAMPLE\_SIZE=6154

#TOTAL\_GENES=18068

#ALPHA=0.05

#FWER\_PERM=10000

#FWER\_THRESH\_ALPHA=4.3E-05

#CONDITIONED\_INTERNAL=genesize,log\_genesize,genedensity,log\_genedensity,samplesize,log\_samplesize,inverse\_mac,log\_inverse\_mac

| SET                       | NGENES | BETA  | BETA_STD | SE     | P        | P_CORR | FULL_NAME                                                                                                                            |
|---------------------------|--------|-------|----------|--------|----------|--------|--------------------------------------------------------------------------------------------------------------------------------------|
| BIOCARTA_TNFR2_PATHWAY    | 17     | 0.637 | 0.0195   | 0.195  | 5.39E-04 | 0.4129 | BIOCARTA_TNFR2_PATHWAY                                                                                                               |
| REACTOME_APC_C_CDC20_M... | 18     | 0.59  | 0.0186   | 0.186  | 7.48E-04 | 0.5118 | REACTOME_APC_C_CDC20_MEDIATED_DEGRADATION_OF_F_CYCLIN_B                                                                              |
| REACTOME_APC_CDC20_MED... | 20     | 0.502 | 0.0167   | 0.171  | 1.64E-03 | 0.7701 | REACTOME_APC_CDC20_MEDIATED_DEGRADATION_OF_NEK2A                                                                                     |
| PID_CONE_PATHWAY          | 20     | 0.484 | 0.0161   | 0.167  | 1.85E-03 | 0.8057 | PID_CONE_PATHWAY                                                                                                                     |
| REACTOME_PERK_REGULATE... | 26     | 0.38  | 0.0144   | 0.132  | 1.99E-03 | 0.8285 | REACTOME_PERK_REGULATED_GENE_EXPRESSION                                                                                              |
| REACTOME_PHOSPHORYLATI... | 16     | 0.575 | 0.0171   | 0.208  | 2.78E-03 | 0.9078 | REACTOME_PHOSPHORYLATION_OF_THE_APC_C                                                                                                |
| REACTOME_TCR_SIGNALING    | 47     | 0.295 | 0.015    | 0.108  | 3.15E-03 | 0.9302 | REACTOME_TCR_SIGNALING                                                                                                               |
| KEGG_NON_HOMOLOGOUS_EN... | 13     | 0.651 | 0.0174   | 0.243  | 3.69E-03 | 0.9553 | KEGG_NON_HOMOLOGOUS_END_JOINING                                                                                                      |
| KEGG_ANTIGEN_PROCESSIN... | 75     | 0.265 | 0.017    | 0.101  | 4.49E-03 | 0.9734 | KEGG_ANTIGEN_PROCESSING_AND_PRESENTATION                                                                                             |
| KEGG_PRION_DISEASES       | 33     | 0.394 | 0.0168   | 0.151  | 4.59E-03 | 0.9751 | KEGG_PRION_DISEASES                                                                                                                  |
| REACTOME_XENOBIOTICS      | 15     | 0.636 | 0.0183   | 0.248  | 5.19E-03 | 0.9839 | REACTOME_XENOBIOTICS                                                                                                                 |
| KEGG_ADIPOCYTOKINE_SIG... | 64     | 0.233 | 0.0138   | 0.0912 | 5.36E-03 | 0.9852 | KEGG_ADIPOCYTOKINE_SIGNALING_PATHWAY                                                                                                 |
| REACTOME_CONVERSION_FR... | 15     | 0.505 | 0.0146   | 0.2    | 5.71E-03 | 0.9886 | REACTOME_CONVERSION_FROM_APC_C_CDC20_TO_APC_C_CDH1_IN_LATE_ANAPHASE                                                                  |
| BIOCARTA_CD40_PATHWAY     | 13     | 0.507 | 0.0136   | 0.207  | 7.09E-03 | 0.9942 | BIOCARTA_CD40_PATHWAY                                                                                                                |
| REACTOME_INHIBITION_OF... | 17     | 0.452 | 0.0139   | 0.184  | 7.12E-03 | 0.9942 | REACTOME_INHIBITION_OF_THE_PROTEOLYTIC_ACTIVITY_OF_APC_C_REQUIRED_FOR_THE_ONSET_OF_ANAPHASE_BY_MITOTIC_SPINDLE_CHECKPOINT_COMPONENTS |
| PID_NFKAPPAB_ATYPICAL_... | 17     | 0.439 | 0.0134   | 0.18   | 7.42E-03 | 0.9946 | PID_NFKAPPAB_ATYPICAL_PATHWAY                                                                                                        |

|                           |     |          |           |        |          |        |                                               |
|---------------------------|-----|----------|-----------|--------|----------|--------|-----------------------------------------------|
| BIOCARTA_CYTOKINE_PATHWAY | 21  | 0.44     | 0.015     | 0.182  | 7.77E-03 | 0.996  | BIOCARTA_CYTOKINE_PATHWAY                     |
| PID_IL1_PATHWAY           | 32  | 0.324    | 0.0136    | 0.134  | 7.93E-03 | 0.9965 | PID_IL1_PATHWAY                               |
| BIOCARTA_CARDIACEGF_PA... | 18  | 0.459    | 0.0145    | 0.192  | 8.50E-03 | 0.9972 | BIOCARTA_CARDIACEGF_PATHWAY                   |
|                           |     |          |           |        |          |        | REACTOME_SYNTHESIS_OF_PIPS_AT_THE_EARLY_ENDOS |
| REACTOME_SYNTHESIS_OF_... | 11  | 0.612    | 0.0151    | 0.257  | 8.62E-03 | 0.9974 | OME_MEMBRANE                                  |
| KEGG_HEMATOPOIETIC_CEL... | 78  | 0.21     | 0.0138    | 0.0911 | 0.010546 | 0.9996 | KEGG_HEMATOPOIETIC_CELL_LINEAGE               |
| REACTOME_DOWNSTREAM_TC... | 31  | 0.3      | 0.0124    | 0.136  | 0.013808 | 0.9999 | REACTOME_DOWNSTREAM_TCR_SIGNALING             |
|                           |     |          |           |        |          |        | REACTOME_NFKB_IS_ACTIVATED_AND_SIGNALS_SURVIV |
| REACTOME_NFKB_IS_ACTIV... | 9   | 0.512    | 0.0114    | 0.23   | 0.013196 | 0.9999 | AL                                            |
| REACTOME_METABOLISM_OF... | 200 | 0.116    | 0.0121    | 0.0506 | 0.011068 | 0.9999 | REACTOME_METABOLISM_OF_MRNA                   |
|                           |     |          |           |        |          |        | REACTOME_REGULATION_OF_MRNA_STABILITY_BY_PRO  |
| REACTOME_REGULATION_OF... | 79  | 0.18     | 0.0119    | 0.0822 | 0.014197 | 0.9999 | TEINS_THAT_BIND_AU_RICH_ELEMENTS              |
| KEGG_GLYCOLYSIS_GLUCON... | 59  | 0.0241   | 0.00137   | 0.108  | 0.41185  | 1      | KEGG_GLYCOLYSIS_GLUONEOGENESIS                |
| KEGG_CITRATE_CYCLE_TCA... | 28  | 0.0578   | 0.00227   | 0.15   | 0.35044  | 1      | KEGG_CITRATE_CYCLE_TCA_CYCLE                  |
| KEGG_PENTOSE_PHOSPHATE... | 23  | 0.112    | 0.00401   | 0.153  | 0.23063  | 1      | KEGG_PENTOSE_PHOSPHATE_PATHWAY                |
|                           |     |          |           |        |          |        | KEGG_PENTOSE_AND_GLUCURONATE_INTERCONVERSI    |
| KEGG_PENTOSE_AND_GLUCU... | 28  | -0.0805  | -0.00317  | 0.189  | 0.66523  | 1      | NS                                            |
| KEGG_FRUCTOSE_AND_MANN... | 32  | 0.121    | 0.00507   | 0.134  | 0.18378  | 1      | KEGG_FRUCTOSE_AND_MANNOSE_METABOLISM          |
| KEGG_GALACTOSE_METABOLISM | 25  | 0.101    | 0.00374   | 0.169  | 0.2754   | 1      | KEGG_GALACTOSE_METABOLISM                     |
| KEGG_ASCORBATE_AND_ALD... | 25  | 0.132    | 0.00491   | 0.226  | 0.27932  | 1      | KEGG_ASCORBATE_AND_ALDARATE_METABOLISM        |
| KEGG_FATTY_ACID_METABO... | 41  | 0.157    | 0.00747   | 0.117  | 0.089715 | 1      | KEGG_FATTY_ACID_METABOLISM                    |
| KEGG_STEROID_BIOSYNTHESIS | 15  | 0.125    | 0.00361   | 0.211  | 0.27612  | 1      | KEGG_STEROID_BIOSYNTHESIS                     |
| KEGG_PRIMARY_BILE_ACID... | 16  | -0.0855  | -0.00254  | 0.182  | 0.68109  | 1      | KEGG_PRIMARY_BILE_ACID_BIOSYNTHESIS           |
| KEGG_STEROID_HORMONE_B... | 54  | -0.00739 | -0.000403 | 0.123  | 0.52399  | 1      | KEGG_STEROID_HORMONE_BIOSYNTHESIS             |
| KEGG_OXIDATIVE_PHOSPHO... | 112 | 0.0337   | 0.00264   | 0.0665 | 0.30623  | 1      | KEGG_OXIDATIVE_PHOSPHORYLATION                |
| KEGG_PURINE_METABOLISM    | 151 | -0.0284  | -0.00259  | 0.0609 | 0.67958  | 1      | KEGG_PURINE_METABOLISM                        |
| KEGG_PYRIMIDINE_METABO... | 92  | -0.133   | -0.0095   | 0.0758 | 0.96078  | 1      | KEGG_PYRIMIDINE_METABOLISM                    |
|                           |     |          |           |        |          |        | KEGG_ALANINE_ASPARTATE_AND_Glutamate_Metabo   |
| KEGG_ALANINE_ASPARTATE... | 31  | -0.126   | -0.0052   | 0.134  | 0.82576  | 1      | LISM                                          |
|                           |     |          |           |        |          |        |                                               |
| KEGG_GLYCINE_SERINE_AN... | 28  | 0.0119   | 0.000469  | 0.143  | 0.46683  | 1      | KEGG_GLYCINE_SERINE_AND_THREONINE_METABOLISM  |
| KEGG_CYSTEINE_AND_METH... | 33  | -0.0375  | -0.0016   | 0.125  | 0.61774  | 1      | KEGG_CYSTEINE_AND_METHIONINE_METABOLISM       |

|                           |    |         |           |        |          |   |                                                               |
|---------------------------|----|---------|-----------|--------|----------|---|---------------------------------------------------------------|
| KEGG_VALINE_LEUCINE_AN... | 43 | 0.0169  | 0.000823  | 0.11   | 0.43878  | 1 | KEGG_VALINE_LEUCINE_AND_ISOLEUCINE_DEGRADATIO<br>N            |
| KEGG_VALINE_LEUCINE_AN... | 10 | -0.535  | -0.0126   | 0.221  | 0.99235  | 1 | KEGG_VALINE_LEUCINE_AND_ISOLEUCINE_BIOSYNTHESIS               |
| KEGG_LYSINE_DEGRADATION   | 42 | 0.178   | 0.00856   | 0.109  | 0.051943 | 1 | KEGG_LYSINE_DEGRADATION                                       |
| KEGG_ARGININE_AND_PROL... | 47 | 0.0087  | 0.000443  | 0.103  | 0.46634  | 1 | KEGG_ARGININE_AND_PROLINE_METABOLISM                          |
| KEGG_HISTIDINE_METABOLISM | 27 | 0.0732  | 0.00283   | 0.153  | 0.31629  | 1 | KEGG_HISTIDINE_METABOLISM                                     |
| KEGG_TYROSINE_METABOLISM  | 40 | 0.0559  | 0.00263   | 0.13   | 0.33367  | 1 | KEGG_TYROSINE_METABOLISM                                      |
| KEGG_PHENYLALANINE_MET... | 16 | -0.139  | -0.00415  | 0.188  | 0.77133  | 1 | KEGG_PHENYLALANINE_METABOLISM                                 |
| KEGG_TRYPTOPHAN_METABO... | 37 | 0.125   | 0.00564   | 0.118  | 0.14528  | 1 | KEGG_TRYPTOPHAN_METABOLISM                                    |
| KEGG_BETA_ALANINE_META... | 21 | 0.202   | 0.0069    | 0.175  | 0.12318  | 1 | KEGG_BETA_ALANINE_METABOLISM                                  |
| KEGG_TAURINE_AND_HYPOT... | 10 | 0.157   | 0.00369   | 0.227  | 0.24494  | 1 | KEGG_TAURINE_AND_HYPOTAURINE_METABOLISM                       |
| KEGG_SELENOAMINO_ACID_... | 26 | -0.175  | -0.00665  | 0.15   | 0.87874  | 1 | KEGG_SELENOAMINO_ACID_METABOLISM                              |
| KEGG_GLUTATHIONE_METAB... | 47 | 0.0194  | 0.00099   | 0.115  | 0.43268  | 1 | KEGG_GLUTATHIONE_METABOLISM                                   |
| KEGG_STARCH_AND_SUCROS... | 52 | 0.188   | 0.0101    | 0.124  | 0.064749 | 1 | KEGG_STARCH_AND_SUCROSE_METABOLISM                            |
| KEGG_N_GLYCAN_BIOSYNTH... | 44 | -0.133  | -0.00656  | 0.113  | 0.88169  | 1 | KEGG_N_GLYCAN_BIOSYNTHESIS                                    |
| KEGG_OTHER_GLYCAN_DEGR... | 16 | 0.268   | 0.00797   | 0.168  | 0.054908 | 1 | KEGG_OTHER_GLYCAN_DEGRADATION                                 |
| KEGG_O_GLYCAN_BIOSYNTH... | 28 | -0.101  | -0.00399  | 0.16   | 0.73685  | 1 | KEGG_O_GLYCAN_BIOSYNTHESIS                                    |
| KEGG_AMINO_SUGAR_AND_N... | 42 | 0.113   | 0.00547   | 0.111  | 0.15348  | 1 | KEGG_AMINO_SUGAR_AND_NUCLEOTIDE_SUGAR_META<br>BOLISM          |
| KEGG_GLYCOSAMINOGLYCAN... | 20 | -0.0363 | -0.00121  | 0.168  | 0.58537  | 1 | KEGG_GLYCOSAMINOGLYCAN_DEGRADATION                            |
| KEGG_GLYCOSAMINOGLYCAN... | 21 | -0.12   | -0.00408  | 0.154  | 0.78169  | 1 | KEGG_GLYCOSAMINOGLYCAN_BIOSYNTHESIS_CHONDROI<br>TIN_SULFATE   |
| KEGG_GLYCOSAMINOGLYCAN... | 15 | -0.0122 | -0.000352 | 0.187  | 0.52609  | 1 | KEGG_GLYCOSAMINOGLYCAN_BIOSYNTHESIS_KERATAN_<br>SULFATE       |
| KEGG_GLYCOSAMINOGLYCAN... | 25 | 0.0815  | 0.00303   | 0.167  | 0.31292  | 1 | KEGG_GLYCOSAMINOGLYCAN_BIOSYNTHESIS_HEPARAN_<br>SULFATE       |
| KEGG_GLYCEROLIPID_META... | 46 | -0.0972 | -0.0049   | 0.124  | 0.78374  | 1 | KEGG_GLYCEROLIPID_METABOLISM                                  |
| KEGG_INOSITOL_PHOSPHAT... | 53 | -0.0594 | -0.00321  | 0.101  | 0.72149  | 1 | KEGG_INOSITOL_PHOSPHATE_METABOLISM                            |
| KEGG_GLYCOSYLPHOSPHATI... | 24 | 0.162   | 0.00591   | 0.135  | 0.11453  | 1 | KEGG_GLYCOSYLPHOSPHATIDYLINOSITOL_GPI_ANCHOR_<br>BIOSYNTHESIS |
| KEGG_GLYCEROPHOSPHOLIP... | 75 | -0.0136 | -0.000876 | 0.0834 | 0.56489  | 1 | KEGG_GLYCEROPHOSPHOLIPID_METABOLISM                           |
| KEGG_ETHER_LIPID_METAB... | 33 | 0.15    | 0.00641   | 0.122  | 0.10886  | 1 | KEGG_ETHER_LIPID_METABOLISM                                   |

|                           |    |         |           |       |          |   |                                                               |
|---------------------------|----|---------|-----------|-------|----------|---|---------------------------------------------------------------|
| KEGG_ARACHIDONIC_ACID_... | 58 | 0.0467  | 0.00264   | 0.1   | 0.3208   | 1 | KEGG_ARACHIDONIC_ACID_METABOLISM                              |
| KEGG_LINOLEIC_ACID_MET... | 29 | 0.153   | 0.00612   | 0.14  | 0.13817  | 1 | KEGG_LINOLEIC_ACID_METABOLISM                                 |
| KEGG_ALPHA_LINOLENIC_A... | 19 | 0.149   | 0.00484   | 0.156 | 0.16924  | 1 | KEGG_ALPHA_LINOLENIC_ACID_METABOLISM                          |
| KEGG_SPHINGOLIPID_META... | 38 | 0.0348  | 0.0016    | 0.133 | 0.39694  | 1 | KEGG_SPHINGOLIPID_METABOLISM                                  |
| KEGG_GLYCOSPHINGOLIPID... | 26 | -0.0973 | -0.00369  | 0.147 | 0.74562  | 1 | KEGG_GLYCOSPHINGOLIPID_BIOSYNTHESIS_LACTO_AND_NEOLACTO_SERIES |
| KEGG_GLYCOSPHINGOLIPID... | 13 | -0.0662 | -0.00177  | 0.207 | 0.62559  | 1 | KEGG_GLYCOSPHINGOLIPID_BIOSYNTHESIS_GLOBOSERIES               |
| KEGG_GLYCOSPHINGOLIPID... | 15 | 0.147   | 0.00423   | 0.202 | 0.2332   | 1 | KEGG_GLYCOSPHINGOLIPID_BIOSYNTHESIS_GANGLIOSERIES             |
| KEGG_PYRUVATE_METABOLISM  | 39 | 0.00666 | 0.000309  | 0.131 | 0.47974  | 1 | KEGG_PYRUVATE_METABOLISM                                      |
| KEGG_GLYOXYLATE_AND_DI... | 16 | -0.0888 | -0.00264  | 0.191 | 0.679    | 1 | KEGG_GLYOXYLATE_AND_DICARBOXYLATE_METABOLISM                  |
| KEGG_PROPANOATE_METABO... | 32 | 0.0569  | 0.00239   | 0.142 | 0.34395  | 1 | KEGG_PROPANOATE_METABOLISM                                    |
| KEGG_BUTANOATE_METABOLISM | 33 | -0.0128 | -0.000548 | 0.136 | 0.53764  | 1 | KEGG_BUTANOATE_METABOLISM                                     |
| KEGG_ONE_CARBON_POOL_B... | 17 | 0.245   | 0.00751   | 0.188 | 0.09566  | 1 | KEGG_ONE_CARBON_POOL_BY_FOLATE                                |
| KEGG_RIBOFLAVIN_METABO... | 15 | -0.0752 | -0.00217  | 0.18  | 0.66168  | 1 | KEGG_RIBOFLAVIN_METABOLISM                                    |
| KEGG_NICOTINATE_AND_NI... | 24 | 0.0778  | 0.00283   | 0.153 | 0.30549  | 1 | KEGG_NICOTINATE_AND_NICOTINAMIDE_METABOLISM                   |
| KEGG_PANTOTHENATE_AND_... | 16 | -0.058  | -0.00173  | 0.195 | 0.6169   | 1 | KEGG_PANTOTHENATE_AND_COA_BIOSYNTHESIS                        |
| KEGG_FOLATE_BIOSYNTHESIS  | 11 | -0.353  | -0.00871  | 0.234 | 0.93408  | 1 | KEGG_FOLATE_BIOSYNTHESIS                                      |
| KEGG_RETINOL_METABOLISM   | 62 | 0.107   | 0.00625   | 0.123 | 0.19329  | 1 | KEGG_RETINOL_METABOLISM                                       |
| KEGG_PORPHYRIN_AND_CHL... | 38 | -0.0995 | -0.00456  | 0.15  | 0.74691  | 1 | KEGG_PORPHYRIN_AND_CHLOROPHYLL_METABOLISM                     |
| KEGG_TERPENOID_BACKBON... | 15 | -0.219  | -0.0063   | 0.194 | 0.8706   | 1 | KEGG_TERPENOID_BACKBONE_BIOSYNTHESIS                          |
| KEGG_LIMONENE_AND_PINE... | 10 | 0.239   | 0.00562   | 0.248 | 0.16739  | 1 | KEGG_LIMONENE_AND_PINENE_DEGRADATION                          |
| KEGG_NITROGEN_METABOLISM  | 21 | 0.0806  | 0.00275   | 0.173 | 0.3209   | 1 | KEGG_NITROGEN_METABOLISM                                      |
| KEGG_SULFUR_METABOLISM    | 12 | 0.29    | 0.00746   | 0.214 | 0.088186 | 1 | KEGG_SULFUR_METABOLISM                                        |
| KEGG_AMINOACYL_TRNA_BI... | 41 | -0.252  | -0.012    | 0.113 | 0.98729  | 1 | KEGG_AMINOACYL_TRNA_BIOSYNTHESIS                              |
| KEGG_METABOLISM_OF_XEN... | 69 | 0.0273  | 0.00168   | 0.123 | 0.41211  | 1 | KEGG_METABOLISM_OF_XENOBIOTICS_BY_CYTOCHROME_P450             |
| KEGG_DRUG_METABOLISM_C... | 69 | 0.186   | 0.0114    | 0.121 | 0.062929 | 1 | KEGG_DRUG_METABOLISM_CYTOCHROME_P450                          |
| KEGG_DRUG_METABOLISM_O... | 50 | 0.0363  | 0.00191   | 0.132 | 0.39145  | 1 | KEGG_DRUG_METABOLISM_OTHER_ENZYMES                            |

|                           |     |          |          |        |          |   |                                              |
|---------------------------|-----|----------|----------|--------|----------|---|----------------------------------------------|
| KEGG_BIOSYNTHESIS_OF_U... | 22  | 0.255    | 0.00888  | 0.175  | 0.072311 | 1 | KEGG_BIOSYNTHESIS_OF_UNSATURATED_FATTY_ACIDS |
| KEGG_ABC_TRANSPORTERS     | 42  | -0.0337  | -0.00162 | 0.126  | 0.60544  | 1 | KEGG_ABC_TRANSPORTERS                        |
| KEGG_RIBOSOME             | 81  | 0.107    | 0.00715  | 0.0783 | 0.085868 | 1 | KEGG_RIBOSOME                                |
| KEGG_RNA_DEGRADATION      | 56  | 0.101    | 0.00559  | 0.0926 | 0.13864  | 1 | KEGG_RNA_DEGRADATION                         |
| KEGG_RNA_POLYMERASE       | 27  | -0.0643  | -0.00248 | 0.126  | 0.69449  | 1 | KEGG_RNA_POLYMERASE                          |
| KEGG_BASAL_TRANSCRIPTI... | 31  | 0.0461   | 0.00191  | 0.133  | 0.36479  | 1 | KEGG_BASAL_TRANSCRIPTION_FACTORS             |
| KEGG_DNA_REPLICATION      | 33  | -0.0759  | -0.00324 | 0.123  | 0.73167  | 1 | KEGG_DNA_REPLICATION                         |
| KEGG_SPLICEOSOME          | 121 | 0.125    | 0.0102   | 0.068  | 0.033306 | 1 | KEGG_SPLICEOSOME                             |
| KEGG_PROTEASOME           | 44  | 0.061    | 0.00301  | 0.113  | 0.29529  | 1 | KEGG_PROTEASOME                              |
| KEGG_PROTEIN_EXPORT       | 23  | -0.13    | -0.00463 | 0.15   | 0.80614  | 1 | KEGG_PROTEIN_EXPORT                          |
| KEGG_PPAR_SIGNALING_PA... | 67  | 0.0697   | 0.00424  | 0.0893 | 0.21741  | 1 | KEGG_PPAR_SIGNALING_PATHWAY                  |
| KEGG_BASE_EXCISION_REPAIR | 32  | -0.135   | -0.00567 | 0.136  | 0.8395   | 1 | KEGG_BASE_EXCISION_REPAIR                    |
| KEGG_NUCLEOTIDE_EXCISI... | 40  | -0.243   | -0.0114  | 0.113  | 0.98422  | 1 | KEGG_NUCLEOTIDE_EXCISION_REPAIR              |
| KEGG_MISMATCH_REPAIR      | 22  | -0.317   | -0.0111  | 0.147  | 0.98427  | 1 | KEGG_MISMATCH_REPAIR                         |
| KEGG_HOMOLOGOUS_RECOMB... | 27  | -0.0434  | -0.00168 | 0.15   | 0.61407  | 1 | KEGG_HOMOLOGOUS_RECOMBINATION                |
| KEGG_MAPK_SIGNALING_PA... | 256 | -0.0367  | -0.00433 | 0.0482 | 0.77643  | 1 | KEGG_MAPK_SIGNALING_PATHWAY                  |
| KEGG_ERBB_SIGNALING_PA... | 84  | 0.117    | 0.00795  | 0.0858 | 0.086698 | 1 | KEGG_ERBB_SIGNALING_PATHWAY                  |
| KEGG_CALCIUM_SIGNALING... | 167 | 0.0443   | 0.00424  | 0.0649 | 0.24753  | 1 | KEGG_CALCIUM_SIGNALING_PATHWAY               |
| KEGG_CYTOKINE_CYTOKINE... | 246 | 0.026    | 0.00302  | 0.0554 | 0.31921  | 1 | KEGG_CYTOKINE_CYTOKINE_RECEPTOR_INTERACTION  |
| KEGG_CHEMOKINE_SIGNALI... | 179 | 0.0662   | 0.00656  | 0.06   | 0.13481  | 1 | KEGG_CHEMOKINE_SIGNALING_PATHWAY             |
| KEGG_PHOSPHATIDYLINOSI... | 74  | -0.0538  | -0.00344 | 0.0923 | 0.72004  | 1 | KEGG_PHOSPHATIDYLINOSITOL_SIGNALING_SYSTEM   |
| KEGG_NEUROACTIVE_LIGAN... | 252 | 0.058    | 0.0068   | 0.0541 | 0.14195  | 1 | KEGG_NEUROACTIVE_LIGAND_RECEPTOR_INTERACTION |
| KEGG_CELL_CYCLE           | 120 | 0.0701   | 0.00569  | 0.0693 | 0.15585  | 1 | KEGG_CELL_CYCLE                              |
| KEGG_OOCYTE_MEIOSIS       | 106 | 0.023    | 0.00176  | 0.0769 | 0.38239  | 1 | KEGG_OOCYTE_MEIOSIS                          |
| KEGG_P53_SIGNALING_PAT... | 66  | 0.000347 | 2.10E-05 | 0.0948 | 0.49854  | 1 | KEGG_P53_SIGNALING_PATHWAY                   |
| KEGG_UBIQUITIN_MEDIATE... | 125 | 0.0815   | 0.00675  | 0.0658 | 0.10795  | 1 | KEGG_UBIQUITIN_MEDIATED_PROTEOLYSIS          |
| KEGG_SNARE_INTERACTION... | 36  | 0.113    | 0.00503  | 0.126  | 0.18565  | 1 | T                                            |
| KEGG_REGULATION_OF_AUT... | 32  | 0.0528   | 0.00222  | 0.151  | 0.36338  | 1 | KEGG_REGULATION_OF_AUTOPHAGY                 |

|                           |     |          |           |        |          |   |                                                |
|---------------------------|-----|----------|-----------|--------|----------|---|------------------------------------------------|
| KEGG_LYSOSOME             | 115 | 0.038    | 0.00302   | 0.0695 | 0.29253  | 1 | KEGG_LYSOSOME                                  |
| KEGG_ENDOCYTOSIS          | 177 | 0.0881   | 0.00867   | 0.0586 | 0.066336 | 1 | KEGG_ENDOCYTOSIS                               |
| KEGG_PEROXISOME           | 76  | -0.00493 | -0.000319 | 0.0812 | 0.52422  | 1 | KEGG_PEROXISOME                                |
| KEGG_MTOR_SIGNALING_PA... | 49  | 0.0192   | 0.000997  | 0.108  | 0.42922  | 1 | KEGG_MTOR_SIGNALING_PATHWAY                    |
| KEGG_APOPTOSIS            | 81  | 0.106    | 0.00709   | 0.0866 | 0.11027  | 1 | KEGG_APOPTOSIS                                 |
| KEGG_CARDIAC_MUSCLE_CO... | 69  | 0.0352   | 0.00217   | 0.0897 | 0.34728  | 1 | KEGG_CARDIAC_MUSCLE_CONTRACTION                |
| KEGG_VASCULAR_SMOOTH_M... | 112 | -0.0231  | -0.00182  | 0.0731 | 0.62413  | 1 | KEGG_VASCULAR_SMOOTH_MUSCLE_CONTRACTION        |
| KEGG_WNT_SIGNALING_PAT... | 145 | -0.13    | -0.0116   | 0.0651 | 0.97739  | 1 | KEGG_WNT_SIGNALING_PATHWAY                     |
| KEGG_DORSO_VENTRAL_AXI... | 24  | -0.0376  | -0.00137  | 0.161  | 0.59229  | 1 | KEGG_DORSO_VENTRAL_AXIS_FORMATION              |
| KEGG_NOTCH_SIGNALING_P... | 47  | -0.154   | -0.00787  | 0.106  | 0.92783  | 1 | KEGG_NOTCH_SIGNALING_PATHWAY                   |
| KEGG_HEDGEHOG_SIGNALIN... | 54  | -0.0155  | -0.000849 | 0.106  | 0.55822  | 1 | KEGG_HEDGEHOG_SIGNALING_PATHWAY                |
| KEGG_TGF_BETA_SIGNALIN... | 85  | -0.0896  | -0.00613  | 0.0829 | 0.86001  | 1 | KEGG_TGF_BETA_SIGNALING_PATHWAY                |
| KEGG_AXON_GUIDANCE        | 122 | 0.0777   | 0.00636   | 0.0736 | 0.14554  | 1 | KEGG_AXON_GUIDANCE                             |
| KEGG_VEGF_SIGNALING_PA... | 76  | 0.0152   | 0.000981  | 0.0832 | 0.42769  | 1 | KEGG_VEGF_SIGNALING_PATHWAY                    |
| KEGG_FOCAL_ADHESION       | 192 | 0.0119   | 0.00122   | 0.0567 | 0.41677  | 1 | KEGG_FOCAL_ADHESION                            |
| KEGG_ECM_RECEPTOR_INTE... | 82  | 0.00944  | 0.000634  | 0.0883 | 0.45745  | 1 | KEGG_ECM_RECEPTOR_INTERACTION                  |
| KEGG_CELL_ADHESION_MOL... | 123 | -0.109   | -0.00893  | 0.075  | 0.92605  | 1 | KEGG_CELL_ADHESION_MOLECULES_CAMS              |
| KEGG_ADHERENS_JUNCTION    | 72  | -0.0993  | -0.00625  | 0.095  | 0.85198  | 1 | KEGG_ADHERENS_JUNCTION                         |
| KEGG_TIGHT_JUNCTION       | 130 | -0.0316  | -0.00267  | 0.0688 | 0.67708  | 1 | KEGG_TIGHT_JUNCTION                            |
| KEGG_GAP_JUNCTION         | 86  | -0.0643  | -0.00442  | 0.0885 | 0.7661   | 1 | KEGG_GAP_JUNCTION                              |
| KEGG_COMPLEMENT_AND_CO... | 66  | 0.0464   | 0.0028    | 0.0992 | 0.31981  | 1 | KEGG_COMPLEMENT_AND_COAGULATION_CASCADES       |
| KEGG_RENIN_ANGIOTENSIN... | 15  | 0.0447   | 0.00129   | 0.221  | 0.41969  | 1 | KEGG_RENIN_ANGIOTENSIN_SYSTEM                  |
| KEGG_TOLL_LIKE_RECEPTO... | 96  | 0.127    | 0.00921   | 0.0835 | 0.064599 | 1 | KEGG_TOLL_LIKE_RECEPTOR_SIGNALING_PATHWAY      |
| KEGG_NOD_LIKE_RECEPTOR... | 57  | 0.151    | 0.00849   | 0.099  | 0.062992 | 1 | KEGG_NOD_LIKE_RECEPTOR_SIGNALING_PATHWAY       |
| KEGG_RIG_I_LIKE_RECEPT... | 65  | 0.076    | 0.00455   | 0.1    | 0.22446  | 1 | KEGG_RIG_I_LIKE_RECEPTOR_SIGNALING_PATHWAY     |
| KEGG_CYTOSOLIC_DNA_SEN... | 50  | 0.0826   | 0.00434   | 0.111  | 0.22845  | 1 | KEGG_CYTOSOLIC_DNA_SENSING_PATHWAY             |
| KEGG_JAK_STAT_SIGNALIN... | 144 | 0.00882  | 0.000784  | 0.0686 | 0.44891  | 1 | KEGG_JAK_STAT_SIGNALING_PATHWAY                |
| KEGG_NATURAL_KILLER_CE... | 126 | 0.0914   | 0.0076    | 0.0749 | 0.11131  | 1 | KEGG_NATURAL_KILLER_CELL_MEDIATED_CYTOTOXICITY |
| KEGG_T_CELL_RECEPTOR_S... | 105 | 0.11     | 0.00838   | 0.0761 | 0.0739   | 1 | KEGG_T_CELL_RECEPTOR_SIGNALING_PATHWAY         |

|                           |     |         |           |        |          |   |                                                                                                    |
|---------------------------|-----|---------|-----------|--------|----------|---|----------------------------------------------------------------------------------------------------|
| KEGG_B_CELL_RECEPTOR_S... | 72  | 0.0428  | 0.0027    | 0.0888 | 0.31507  | 1 | KEGG_B_CELL_RECEPTOR_SIGNALING_PATHWAY                                                             |
| KEGG_FC_EPSILON_RI_SIG... | 77  | 0.0226  | 0.00147   | 0.0838 | 0.39369  | 1 | KEGG_FC_EPSILON_RI_SIGNALING_PATHWAY                                                               |
| KEGG_FC_GAMMA_R_MEDIAT... | 92  | -0.0202 | -0.00144  | 0.0849 | 0.59398  | 1 | KEGG_FC_GAMMA_R_MEDIATED_PHAGOCYTOSIS                                                              |
| KEGG_LEUKOCYTE_TRANSEN... | 111 | -0.0345 | -0.0027   | 0.0743 | 0.67896  | 1 | KEGG_LEUKOCYTE_TRANSENDOTHELIAL_MIGRATION<br>KEGG_INTESTINAL_IMMUNE_NETWORK_FOR_IGA_PROD<br>UCTION |
| KEGG_INTESTINAL_IMMUNE... | 43  | 0.138   | 0.00675   | 0.128  | 0.14043  | 1 |                                                                                                    |
| KEGG_CIRCADIAN_RHYTHM_... | 13  | -0.458  | -0.0123   | 0.216  | 0.98307  | 1 | KEGG_CIRCADIAN_RHYTHM_MAMMAL                                                                       |
| KEGG_LONG_TERM_POTENTI... | 66  | 0.0107  | 0.000648  | 0.0927 | 0.45392  | 1 | KEGG_LONG_TERM_POTENTIATION                                                                        |
| KEGG_NEUROTROPHIN_SIGN... | 120 | 0.0266  | 0.00216   | 0.0699 | 0.35161  | 1 | KEGG_NEUROTROPHIN_SIGNALING_PATHWAY                                                                |
| KEGG_LONG_TERM_DEPRESSION | 68  | -0.0448 | -0.00274  | 0.0931 | 0.68478  | 1 | KEGG_LONG_TERM_DEPRESSION                                                                          |
| KEGG_OLFACTORY_TRANSDU... | 341 | 0.0417  | 0.00567   | 0.0593 | 0.24113  | 1 | KEGG_OLFACTORY_TRANSDUCTION                                                                        |
| KEGG_TASTE_TRANSDUCTION   | 48  | -0.0674 | -0.00347  | 0.124  | 0.70606  | 1 | KEGG_TASTE_TRANSDUCTION                                                                            |
| KEGG_REGULATION_OF_ACT... | 199 | -0.0909 | -0.00949  | 0.0544 | 0.9526   | 1 | KEGG_REGULATION_OF_ACTIN_CYTOSKELETON                                                              |
| KEGG_INSULIN_SIGNALING... | 130 | -0.0248 | -0.0021   | 0.0655 | 0.64754  | 1 | KEGG_INSULIN_SIGNALING_PATHWAY                                                                     |
| KEGG_GNRH_SIGNALING_PA... | 98  | 0.0132  | 0.000973  | 0.0787 | 0.43316  | 1 | KEGG_GNRH_SIGNALING_PATHWAY<br>KEGG_PROGESTERONE_MEDIATED_OOCYTE_MATURATIO<br>N                    |
| KEGG_PROGESTERONE_MEDI... | 79  | -0.0046 | -0.000303 | 0.0849 | 0.52159  | 1 |                                                                                                    |
| KEGG_MELANOGENESIS        | 99  | -0.206  | -0.0152   | 0.0781 | 0.99589  | 1 | KEGG_MELANOGENESIS                                                                                 |
| KEGG_TYPE_II_DIABETES_... | 46  | 0.194   | 0.00977   | 0.118  | 0.050119 | 1 | KEGG_TYPE_II_DIABETES_MELLITUS                                                                     |
| KEGG_TYPE_I_DIABETES_M... | 39  | 0.297   | 0.0138    | 0.138  | 0.016043 | 1 | KEGG_TYPE_I_DIABETES_MELLITUS                                                                      |
| KEGG_MATURITY_ONSET_DI... | 25  | -0.12   | -0.00447  | 0.159  | 0.77479  | 1 | KEGG_MATURITY_ONSET_DIABETES_OF_THE_YOUNG<br>KEGG_ALDOSTERONE_REGULATED_SODIUM_REABSORPT<br>ION    |
| KEGG_ALDOSTERONE_REGUL... | 40  | 0.0199  | 0.000937  | 0.125  | 0.43658  | 1 |                                                                                                    |
| KEGG_VASOPRESSIN_REGUL... | 42  | -0.0635 | -0.00306  | 0.122  | 0.69881  | 1 | KEGG_VASOPRESSIN_REGULATED_WATER_REABSORPTIO<br>N                                                  |
| KEGG_PROXIMAL_TUBULE_B... | 21  | 0.199   | 0.00679   | 0.152  | 0.094634 | 1 | KEGG_PROXIMAL_TUBULE_BICARBONATE_RECLAMATION                                                       |
| KEGG_ALZHEIMERS_DISEASE   | 153 | 0.061   | 0.00559   | 0.0587 | 0.14948  | 1 | KEGG_ALZHEIMERS_DISEASE                                                                            |
| KEGG_PARKINSONS_DISEASE   | 108 | -0.0149 | -0.00115  | 0.0672 | 0.58788  | 1 | KEGG_PARKINSONS_DISEASE                                                                            |
| KEGG_AMYOTROPHIC_LATER... | 53  | 0.0912  | 0.00493   | 0.104  | 0.19075  | 1 | KEGG_AMYOTROPHIC_LATERAL_SCLEROSIS_ALS                                                             |
| KEGG_HUNTINGTONS_DISEASE  | 166 | -0.07   | -0.00668  | 0.0556 | 0.89567  | 1 | KEGG_HUNTINGTONS_DISEASE                                                                           |

|                           |     |          |           |        |          |   |                                                                                                       |
|---------------------------|-----|----------|-----------|--------|----------|---|-------------------------------------------------------------------------------------------------------|
| KEGG_VIBRIO_CHOLERAЕ_I... | 51  | -0.00916 | -0.000486 | 0.113  | 0.53237  | 1 | KEGG_VIBRIO_CHOLERAЕ_INFECTION                                                                        |
| KEGG_EPITHELIAL_CELL_S... | 65  | 0.117    | 0.00703   | 0.0925 | 0.10223  | 1 | KEGG_EPITHELIAL_CELL_SIGNALING_IN_HELICOBACTER_P<br>YLORI_INFECTION                                   |
| KEGG_PATHOGENIC_ESCHER... | 54  | 0.0251   | 0.00137   | 0.107  | 0.407    | 1 | KEGG_PATHOGENIC_ESCHERICHIA_COLI_INFECTION                                                            |
| KEGG_LEISHMANIA_INFECTION | 64  | 0.00757  | 0.00045   | 0.104  | 0.47095  | 1 | KEGG_LEISHMANIA_INFECTION                                                                             |
| KEGG_PATHWAYS_IN_CANCER   | 314 | 0.00192  | 0.00025   | 0.0449 | 0.48298  | 1 | KEGG_PATHWAYS_IN_CANCER                                                                               |
| KEGG_COLORECTAL_CANCER    | 61  | -0.0778  | -0.00451  | 0.1    | 0.78126  | 1 | KEGG_COLORECTAL_CANCER                                                                                |
| KEGG_RENAL_CELL_CARCINOMA | 67  | 0.0161   | 0.000977  | 0.0948 | 0.43266  | 1 | KEGG_RENAL_CELL_CARCINOMA                                                                             |
| KEGG_PANCREATIC_CANCER    | 66  | 0.0193   | 0.00117   | 0.0956 | 0.41979  | 1 | KEGG_PANCREATIC_CANCER                                                                                |
| KEGG_ENDOMETRIAL_CANCER   | 50  | -0.157   | -0.00823  | 0.107  | 0.92858  | 1 | KEGG_ENDOMETRIAL_CANCER                                                                               |
| KEGG_GLIOMA               | 63  | -0.0367  | -0.00216  | 0.0953 | 0.6498   | 1 | KEGG_GLIOMA                                                                                           |
| KEGG_PROSTATE_CANCER      | 85  | -0.0584  | -0.00399  | 0.0782 | 0.77217  | 1 | KEGG_PROSTATE_CANCER                                                                                  |
| KEGG_THYROID_CANCER       | 29  | -0.316   | -0.0126   | 0.141  | 0.98752  | 1 | KEGG_THYROID_CANCER                                                                                   |
| KEGG_BASAL_CELL_CARCINOMA | 54  | -0.3     | -0.0164   | 0.106  | 0.99779  | 1 | KEGG_BASAL_CELL_CARCINOMA                                                                             |
| KEGG_MELANOMA             | 67  | -0.17    | -0.0103   | 0.0964 | 0.96072  | 1 | KEGG_MELANOMA                                                                                         |
| KEGG_BLADDER_CANCER       | 40  | -0.0387  | -0.00182  | 0.123  | 0.62354  | 1 | KEGG_BLADDER_CANCER                                                                                   |
| KEGG_CHRONIC_MYELOID_L... | 71  | -0.00264 | -0.000165 | 0.0902 | 0.51168  | 1 | KEGG_CHRONIC_MYELOID_LEUKEMIA                                                                         |
| KEGG_ACUTE_MYELOID_LEU... | 54  | 0.116    | 0.00635   | 0.106  | 0.13668  | 1 | KEGG_ACUTE_MYELOID_LEUKEMIA                                                                           |
| KEGG_SMALL_CELL_LUNG_C... | 81  | 0.102    | 0.00683   | 0.087  | 0.12017  | 1 | KEGG_SMALL_CELL_LUNG_CANCER                                                                           |
| KEGG_NON_SMALL_CELL_LU... | 53  | -0.0986  | -0.00533  | 0.105  | 0.82594  | 1 | KEGG_NON_SMALL_CELL_LUNG_CANCER                                                                       |
| KEGG_ASTHMA               | 25  | 0.0991   | 0.00369   | 0.163  | 0.27169  | 1 | KEGG_ASTHMA                                                                                           |
| KEGG_AUTOIMMUNE_THYROI... | 45  | 0.0433   | 0.00216   | 0.143  | 0.38132  | 1 | KEGG_AUTOIMMUNE_THYROID_DISEASE                                                                       |
| KEGG_SYSTEMIC_LUPUS_ER... | 102 | -0.0549  | -0.00411  | 0.0902 | 0.72844  | 1 | KEGG_SYSTEMIC_LUPUS_ERYTHEMATOSUS                                                                     |
| KEGG_ALLOGRAFT_REJECTION  | 32  | 0.111    | 0.00466   | 0.152  | 0.23305  | 1 | KEGG_ALLOGRAFT_REJECTION                                                                              |
| KEGG_GRAFT_VERSUS_HOST... | 33  | 0.117    | 0.00502   | 0.151  | 0.21901  | 1 | KEGG_GRAFT_VERSUS_HOST_DISEASE                                                                        |
| KEGG_PRIMARY_IMMUNODEF... | 31  | 0.184    | 0.00762   | 0.145  | 0.10163  | 1 | KEGG_PRIMARY_IMMUNODEFICIENCY                                                                         |
| KEGG_HYPERTROPHIC_CARD... | 80  | -0.112   | -0.00742  | 0.0874 | 0.8994   | 1 | KEGG_HYPERTROPHIC_CARDIOMYOPATHY_HCM<br>KEGG_ARRHYTHMOGENIC_RIGHT_VENTRICULAR_CARDIO<br>MYOPATHY_ARVC |
| KEGG_ARRHYTHMOGENIC_RI... | 71  | -0.0808  | -0.00506  | 0.0993 | 0.79203  | 1 | KEGG_DILATED_CARDIOMYOPATHY                                                                           |
| KEGG_DILATED_CARDIOMYO... | 86  | -0.108   | -0.00746  | 0.087  | 0.89338  | 1 | KEGG_VIRAL_MYOCARDITIS                                                                                |
| KEGG_VIRAL_MYOCARDITIS    | 64  | -0.0834  | -0.00495  | 0.107  | 0.78315  | 1 | KEGG_VIRAL_MYOCARDITIS                                                                                |
| BIOCARTA_RELA_PATHWAY     | 15  | 0.282    | 0.00811   | 0.174  | 0.052547 | 1 | BIOCARTA_RELA_PATHWAY                                                                                 |



|                           |    |         |          |       |          |   |                                    |
|---------------------------|----|---------|----------|-------|----------|---|------------------------------------|
| BIOCARTA_NO1_PATHWAY      | 30 | -0.0864 | -0.00352 | 0.151 | 0.71655  | 1 | BIOCARTA_NO1_PATHWAY               |
| BIOCARTA_CSK_PATHWAY      | 23 | -0.0801 | -0.00286 | 0.16  | 0.69183  | 1 | BIOCARTA_CSK_PATHWAY               |
| BIOCARTA_SRCRPTP_PATHWAY  | 11 | 0.114   | 0.00282  | 0.193 | 0.27667  | 1 | BIOCARTA_SRCRPTP_PATHWAY           |
| BIOCARTA_AMI_PATHWAY      | 18 | -0.232  | -0.00731 | 0.184 | 0.89621  | 1 | BIOCARTA_AMI_PATHWAY               |
| BIOCARTA_GRANULOCYTES_... | 14 | -0.356  | -0.0099  | 0.22  | 0.94734  | 1 | BIOCARTA_GRANULOCYTES_PATHWAY      |
| BIOCARTA_LYM_PATHWAY      | 11 | -0.203  | -0.005   | 0.271 | 0.77259  | 1 | BIOCARTA_LYM_PATHWAY               |
| BIOCARTA_ARAP_PATHWAY     | 17 | -0.433  | -0.0133  | 0.174 | 0.99363  | 1 | BIOCARTA_ARAP_PATHWAY              |
| BIOCARTA_AGR_PATHWAY      | 34 | 0.0404  | 0.00175  | 0.14  | 0.38625  | 1 | BIOCARTA_AGR_PATHWAY               |
| BIOCARTA_AKAP95_PATHWAY   | 12 | 0.155   | 0.004    | 0.235 | 0.25463  | 1 | BIOCARTA_AKAP95_PATHWAY            |
| BIOCARTA_AKT_PATHWAY      | 20 | 0.242   | 0.00806  | 0.162 | 0.067307 | 1 | BIOCARTA_AKT_PATHWAY               |
| BIOCARTA_ALK_PATHWAY      | 36 | -0.154  | -0.00685 | 0.133 | 0.87654  | 1 | BIOCARTA_ALK_PATHWAY               |
| BIOCARTA_AT1R_PATHWAY     | 32 | 0.0332  | 0.0014   | 0.136 | 0.40396  | 1 | BIOCARTA_AT1R_PATHWAY              |
| BIOCARTA_ACE2_PATHWAY     | 9  | 0.465   | 0.0104   | 0.288 | 0.05283  | 1 | BIOCARTA_ACE2_PATHWAY              |
| BIOCARTA_ASBCELL_PATHWAY  | 10 | 0.0847  | 0.00199  | 0.249 | 0.36666  | 1 | BIOCARTA_ASBCELL_PATHWAY           |
| BIOCARTA_DNAFRAGMENT_P... | 10 | -0.335  | -0.00788 | 0.252 | 0.90813  | 1 | BIOCARTA_DNAFRAGMENT_PATHWAY       |
| BIOCARTA_CHEMICAL_PATHWAY | 22 | -0.0478 | -0.00167 | 0.153 | 0.62227  | 1 | BIOCARTA_CHEMICAL_PATHWAY          |
| BIOCARTA_SPPA_PATHWAY     | 22 | -0.423  | -0.0148  | 0.168 | 0.99413  | 1 | BIOCARTA_SPPA_PATHWAY              |
| BIOCARTA_ATM_PATHWAY      | 20 | 0.0766  | 0.00255  | 0.195 | 0.34714  | 1 | BIOCARTA_ATM_PATHWAY               |
| BIOCARTA_AGPCR_PATHWAY    | 13 | -0.185  | -0.00495 | 0.213 | 0.80659  | 1 | BIOCARTA_AGPCR_PATHWAY             |
| BIOCARTA_BCELLSURVIVAL... | 15 | 0.0484  | 0.00139  | 0.176 | 0.39134  | 1 | BIOCARTA_BCELLSURVIVAL_PATHWAY     |
| BIOCARTA_BLYMPHOCYTE_P... | 10 | -0.48   | -0.0113  | 0.278 | 0.95808  | 1 | BIOCARTA_BLYMPHOCYTE_PATHWAY       |
| BIOCARTA_BCR_PATHWAY      | 32 | 0.1     | 0.00423  | 0.129 | 0.21773  | 1 | BIOCARTA_BCR_PATHWAY               |
| BIOCARTA_BIOPEPTIDES_P... | 41 | -0.0703 | -0.00334 | 0.117 | 0.72521  | 1 | BIOCARTA_BIOPEPTIDES_PATHWAY       |
| BIOCARTA_NEUROTRANSMIT... | 6  | 0.584   | 0.0106   | 0.306 | 0.028081 | 1 | BIOCARTA_NEUROTRANSMITTERS_PATHWAY |
| BIOCARTA_RANKL_PATHWAY    | 14 | 0.0771  | 0.00214  | 0.199 | 0.34916  | 1 | BIOCARTA_RANKL_PATHWAY             |
| BIOCARTA_CACAM_PATHWAY    | 13 | 0.31    | 0.00832  | 0.218 | 0.077638 | 1 | BIOCARTA_CACAM_PATHWAY             |
| BIOCARTA_CDMAC_PATHWAY    | 16 | 0.128   | 0.0038   | 0.201 | 0.26213  | 1 | BIOCARTA_CDMAC_PATHWAY             |
| BIOCARTA_CARM_ER_PATHWAY  | 31 | -0.226  | -0.00937 | 0.119 | 0.97103  | 1 | BIOCARTA_CARM_ER_PATHWAY           |
| BIOCARTA_CASPASE_PATHWAY  | 22 | -0.145  | -0.00507 | 0.16  | 0.81815  | 1 | BIOCARTA_CASPASE_PATHWAY           |
| BIOCARTA_CBL_PATHWAY      | 12 | -0.039  | -0.001   | 0.249 | 0.56212  | 1 | BIOCARTA_CBL_PATHWAY               |
| BIOCARTA_CCR3_PATHWAY     | 22 | -0.343  | -0.012   | 0.172 | 0.97704  | 1 | BIOCARTA_CCR3_PATHWAY              |
| BIOCARTA_MCM_PATHWAY      | 18 | 0.191   | 0.00604  | 0.169 | 0.12894  | 1 | BIOCARTA_MCM_PATHWAY               |
| BIOCARTA_G1_PATHWAY       | 28 | 0.0262  | 0.00103  | 0.149 | 0.43013  | 1 | BIOCARTA_G1_PATHWAY                |

|                            |    |         |           |       |          |   |                                |
|----------------------------|----|---------|-----------|-------|----------|---|--------------------------------|
| BIOCARTA_G2_PATHWAY        | 24 | 0.0559  | 0.00204   | 0.159 | 0.36216  | 1 | BIOCARTA_G2_PATHWAY            |
| BIOCARTA_CELL2CELL_PATH... | 14 | 0.0564  | 0.00157   | 0.212 | 0.39506  | 1 | BIOCARTA_CELL2CELL_PATHWAY     |
| BIOCARTA_LAIR_PATHWAY      | 17 | -0.129  | -0.00394  | 0.2   | 0.7399   | 1 | BIOCARTA_LAIR_PATHWAY          |
| BIOCARTA_CERAMIDE_PATHWAY  | 21 | 0.0532  | 0.00181   | 0.161 | 0.37053  | 1 | BIOCARTA_CERAMIDE_PATHWAY      |
| BIOCARTA_TID_PATHWAY       | 19 | 0.214   | 0.00695   | 0.17  | 0.10399  | 1 | BIOCARTA_TID_PATHWAY           |
| BIOCARTA_CLASSIC_PATHWAY   | 13 | 0.0937  | 0.00251   | 0.223 | 0.33703  | 1 | BIOCARTA_CLASSIC_PATHWAY       |
| BIOCARTA_COMP_PATHWAY      | 18 | 0.103   | 0.00324   | 0.197 | 0.30101  | 1 | BIOCARTA_COMP_PATHWAY          |
| BIOCARTA_VDR_PATHWAY       | 12 | -0.0475 | -0.00122  | 0.241 | 0.57807  | 1 | BIOCARTA_VDR_PATHWAY           |
| BIOCARTA_HDAC_PATHWAY      | 29 | -0.24   | -0.00959  | 0.156 | 0.93721  | 1 | BIOCARTA_HDAC_PATHWAY          |
| BIOCARTA_GCR_PATHWAY       | 19 | -0.0844 | -0.00273  | 0.174 | 0.68582  | 1 | BIOCARTA_GCR_PATHWAY           |
| BIOCARTA_CTCF_PATHWAY      | 23 | 0.0371  | 0.00132   | 0.162 | 0.40917  | 1 | BIOCARTA_CTCF_PATHWAY          |
| BIOCARTA_CTL_PATHWAY       | 15 | -0.0224 | -0.000645 | 0.22  | 0.5405   | 1 | BIOCARTA_CTL_PATHWAY           |
| BIOCARTA_CXCR4_PATHWAY     | 24 | -0.15   | -0.00548  | 0.151 | 0.83983  | 1 | BIOCARTA_CXCR4_PATHWAY         |
| BIOCARTA_CELLCYCLE_PATH... | 23 | 0.334   | 0.0119    | 0.165 | 0.021578 | 1 | BIOCARTA_CELLCYCLE_PATHWAY     |
| BIOCARTA_CFTR_PATHWAY      | 12 | -0.0734 | -0.00189  | 0.242 | 0.61906  | 1 | BIOCARTA_CFTR_PATHWAY          |
| BIOCARTA_INFLAM_PATHWAY    | 27 | 0.2     | 0.00771   | 0.156 | 0.10063  | 1 | BIOCARTA_INFLAM_PATHWAY        |
| BIOCARTA_D4GDI_PATHWAY     | 13 | 0.378   | 0.0101    | 0.244 | 0.060967 | 1 | BIOCARTA_D4GDI_PATHWAY         |
| BIOCARTA_DC_PATHWAY        | 21 | 0.0575  | 0.00196   | 0.173 | 0.37004  | 1 | BIOCARTA_DC_PATHWAY            |
| BIOCARTA_P35ALZHEIMERS...  | 11 | -0.079  | -0.00195  | 0.239 | 0.62961  | 1 | BIOCARTA_P35ALZHEIMERS_PATHWAY |
| BIOCARTA_RNA_PATHWAY       | 10 | -0.0714 | -0.00168  | 0.23  | 0.62167  | 1 | BIOCARTA_RNA_PATHWAY           |
| BIOCARTA_MTA3_PATHWAY      | 18 | -0.412  | -0.013    | 0.214 | 0.9732   | 1 | BIOCARTA_MTA3_PATHWAY          |
| BIOCARTA_SKP2E2F_PATHWAY   | 10 | 0.508   | 0.0119    | 0.258 | 0.024373 | 1 | BIOCARTA_SKP2E2F_PATHWAY       |
| BIOCARTA_CALCINEURIN_P...  | 18 | 0.148   | 0.00467   | 0.185 | 0.21169  | 1 | BIOCARTA_CALCINEURIN_PATHWAY   |
| BIOCARTA_EGF_PATHWAY       | 30 | 0.0732  | 0.00298   | 0.142 | 0.30338  | 1 | BIOCARTA_EGF_PATHWAY           |
| BIOCARTA_ETC_PATHWAY       | 9  | 0.0622  | 0.00139   | 0.239 | 0.39723  | 1 | BIOCARTA_ETC_PATHWAY           |
| BIOCARTA_NDKDYNAMIN_PA...  | 18 | 0.0629  | 0.00198   | 0.179 | 0.36245  | 1 | BIOCARTA_NDKDYNAMIN_PATHWAY    |
| BIOCARTA_EPHA4_PATHWAY     | 9  | -0.474  | -0.0106   | 0.281 | 0.95427  | 1 | BIOCARTA_EPHA4_PATHWAY         |
| BIOCARTA_EPO_PATHWAY       | 18 | 0.261   | 0.00823   | 0.16  | 0.051579 | 1 | BIOCARTA_EPO_PATHWAY           |
| BIOCARTA_ECM_PATHWAY       | 24 | -0.301  | -0.011    | 0.148 | 0.97932  | 1 | BIOCARTA_ECM_PATHWAY           |
| BIOCARTA_ERK_PATHWAY       | 27 | -0.26   | -0.01     | 0.145 | 0.9633   | 1 | BIOCARTA_ERK_PATHWAY           |
| BIOCARTA_ERYTH_PATHWAY     | 15 | -0.0257 | -0.00074  | 0.182 | 0.55596  | 1 | BIOCARTA_ERYTH_PATHWAY         |
| BIOCARTA_EPONFKB_PATHWAY   | 11 | 0.371   | 0.00916   | 0.225 | 0.049773 | 1 | BIOCARTA_EPONFKB_PATHWAY       |
| BIOCARTA{EIF_PATHWAY       | 14 | -0.0795 | -0.00221  | 0.188 | 0.66349  | 1 | BIOCARTA{EIF_PATHWAY           |

|                               |    |         |           |       |         |   |                               |
|-------------------------------|----|---------|-----------|-------|---------|---|-------------------------------|
| BIOCARTA_EXTRINSIC_PATHWAY    | 13 | -0.282  | -0.00755  | 0.21  | 0.90988 | 1 | BIOCARTA_EXTRINSIC_PATHWAY    |
| BIOCARTA_FAS_PATHWAY          | 30 | -0.0848 | -0.00345  | 0.144 | 0.72213 | 1 | BIOCARTA_FAS_PATHWAY          |
| BIOCARTA_FCER1_PATHWAY        | 36 | -0.01   | -0.000447 | 0.125 | 0.53187 | 1 | BIOCARTA_FCER1_PATHWAY        |
| BIOCARTA_FEEDER_PATHWAY       | 9  | -0.0473 | -0.00105  | 0.241 | 0.57766 | 1 | BIOCARTA_FEEDER_PATHWAY       |
| BIOCARTA_FIBRINOLYSIS_PATHWAY | 12 | -0.149  | -0.00384  | 0.221 | 0.74958 | 1 | BIOCARTA_FIBRINOLYSIS_PATHWAY |
| BIOCARTA FMLP_PATHWAY         | 34 | -0.206  | -0.00894  | 0.132 | 0.94036 | 1 | BIOCARTA FMLP_PATHWAY         |
| BIOCARTA_FREE_PATHWAY         | 9  | 0.0919  | 0.00205   | 0.24  | 0.35124 | 1 | BIOCARTA_FREE_PATHWAY         |
| BIOCARTA_GABA_PATHWAY         | 9  | -0.121  | -0.0027   | 0.293 | 0.65991 | 1 | BIOCARTA_GABA_PATHWAY         |
| BIOCARTA_GATA3_PATHWAY        | 16 | 0.0752  | 0.00224   | 0.218 | 0.36478 | 1 | BIOCARTA_GATA3_PATHWAY        |
| BIOCARTA_GLYCOLYSIS_PATHWAY   | 9  | -0.115  | -0.00258  | 0.217 | 0.70279 | 1 | BIOCARTA_GLYCOLYSIS_PATHWAY   |
| BIOCARTA_SET_PATHWAY          | 11 | 0.171   | 0.00422   | 0.252 | 0.24853 | 1 | BIOCARTA_SET_PATHWAY          |
| BIOCARTA_GH_PATHWAY           | 28 | 0.0679  | 0.00267   | 0.136 | 0.30833 | 1 | BIOCARTA_GH_PATHWAY           |
| BIOCARTA_AHSP_PATHWAY         | 9  | 0.209   | 0.00467   | 0.212 | 0.16209 | 1 | BIOCARTA_AHSP_PATHWAY         |
| BIOCARTA_TCAPOPTOSIS_PATHWAY  | 11 | -0.137  | -0.00337  | 0.25  | 0.70773 | 1 | BIOCARTA_TCAPOPTOSIS_PATHWAY  |
| BIOCARTA_HIVNEF_PATHWAY       | 55 | -0.15   | -0.00828  | 0.107 | 0.91986 | 1 | BIOCARTA_HIVNEF_PATHWAY       |
| BIOCARTA_SALMONELLA_PATHWAY   | 13 | -0.0397 | -0.00107  | 0.205 | 0.57699 | 1 | BIOCARTA_SALMONELLA_PATHWAY   |
| BIOCARTA_MPR_PATHWAY          | 34 | -0.119  | -0.00517  | 0.133 | 0.81594 | 1 | BIOCARTA_MPR_PATHWAY          |
| BIOCARTA_HCMV_PATHWAY         | 17 | -0.0285 | -0.000875 | 0.189 | 0.56018 | 1 | BIOCARTA_HCMV_PATHWAY         |
| BIOCARTA_P53HYPOXIA_PATHWAY   | 21 | -0.249  | -0.00848  | 0.153 | 0.948   | 1 | BIOCARTA_P53HYPOXIA_PATHWAY   |
| BIOCARTA_HIF_PATHWAY          | 15 | 0.189   | 0.00544   | 0.185 | 0.15428 | 1 | BIOCARTA_HIF_PATHWAY          |
| BIOCARTA_IGF1_PATHWAY         | 20 | -0.016  | -0.000533 | 0.166 | 0.53857 | 1 | BIOCARTA_IGF1_PATHWAY         |
| BIOCARTA_IL17_PATHWAY         | 17 | -0.141  | -0.00432  | 0.204 | 0.75489 | 1 | BIOCARTA_IL17_PATHWAY         |
| BIOCARTA_IL2_PATHWAY          | 20 | 0.112   | 0.00372   | 0.171 | 0.25672 | 1 | BIOCARTA_IL2_PATHWAY          |
| BIOCARTA_IL3_PATHWAY          | 14 | 0.121   | 0.00337   | 0.193 | 0.26479 | 1 | BIOCARTA_IL3_PATHWAY          |
| BIOCARTA_IL4_PATHWAY          | 10 | -0.0737 | -0.00173  | 0.22  | 0.63124 | 1 | BIOCARTA_IL4_PATHWAY          |
| BIOCARTA_IL5_PATHWAY          | 9  | 0.0254  | 0.000567  | 0.27  | 0.46246 | 1 | BIOCARTA_IL5_PATHWAY          |
| BIOCARTA_IL6_PATHWAY          | 21 | 0.105   | 0.00356   | 0.162 | 0.25865 | 1 | BIOCARTA_IL6_PATHWAY          |
| BIOCARTA_IL10_PATHWAY         | 17 | -0.218  | -0.00669  | 0.216 | 0.84424 | 1 | BIOCARTA_IL10_PATHWAY         |
| BIOCARTA_IL12_PATHWAY         | 22 | -0.158  | -0.0055   | 0.177 | 0.81332 | 1 | BIOCARTA_IL12_PATHWAY         |
| BIOCARTA_IL2RB_PATHWAY        | 37 | 0.0868  | 0.00392   | 0.121 | 0.23726 | 1 | BIOCARTA_IL2RB_PATHWAY        |
| BIOCARTA_IL22BP_PATHWAY       | 16 | 0.179   | 0.00533   | 0.231 | 0.21859 | 1 | BIOCARTA_IL22BP_PATHWAY       |
| BIOCARTA_IL7_PATHWAY          | 16 | 0.121   | 0.00361   | 0.192 | 0.26348 | 1 | BIOCARTA_IL7_PATHWAY          |
| BIOCARTA_GSK3_PATHWAY         | 25 | -0.161  | -0.00598  | 0.143 | 0.86968 | 1 | BIOCARTA_GSK3_PATHWAY         |

|                           |    |         |           |        |          |   |                               |
|---------------------------|----|---------|-----------|--------|----------|---|-------------------------------|
| BIOCARTA_DEATH_PATHWAY    | 32 | -0.013  | -0.000545 | 0.136  | 0.53796  | 1 | BIOCARTA_DEATH_PATHWAY        |
| BIOCARTA_RACCYCD_PATHWAY  | 25 | 0.158   | 0.00586   | 0.144  | 0.13748  | 1 | BIOCARTA_RACCYCD_PATHWAY      |
| BIOCARTA_GLEEVEC_PATHWAY  | 23 | -0.0233 | -0.000832 | 0.16   | 0.55779  | 1 | BIOCARTA_GLEEVEC_PATHWAY      |
| BIOCARTA_INSULIN_PATHWAY  | 21 | 0.0328  | 0.00112   | 0.164  | 0.42087  | 1 | BIOCARTA_INSULIN_PATHWAY      |
| BIOCARTA_INTEGRIN_PATHWAY | 38 | -0.166  | -0.0076   | 0.121  | 0.91523  | 1 | BIOCARTA_INTEGRIN_PATHWAY     |
| BIOCARTA_INTRINSIC_PAT... | 19 | -0.103  | -0.00335  | 0.183  | 0.71429  | 1 | BIOCARTA_INTRINSIC_PATHWAY    |
| BIOCARTA_KERATINOCYTE_... | 46 | 0.212   | 0.0107    | 0.121  | 0.039618 | 1 | BIOCARTA_KERATINOCYTE_PATHWAY |
| BIOCARTA_TCRA_PATHWAY     | 12 | -0.101  | -0.0026   | 0.233  | 0.66757  | 1 | BIOCARTA_TCRA_PATHWAY         |
| BIOCARTA_LLECTIN_PATHWAY  | 12 | 0.00143 | 3.69E-05  | 0.225  | 0.49746  | 1 | BIOCARTA_LLECTIN_PATHWAY      |
| BIOCARTA_PYK2_PATHWAY     | 28 | 0.078   | 0.00307   | 0.136  | 0.28357  | 1 | BIOCARTA_PYK2_PATHWAY         |
| BIOCARTA_EGFR_SMRTE_PA... | 11 | 0.401   | 0.00988   | 0.271  | 0.069518 | 1 | BIOCARTA_EGFR_SMRTE_PATHWAY   |
| BIOCARTA_MAPK_PATHWAY     | 84 | 0.00515 | 0.000351  | 0.0794 | 0.47412  | 1 | BIOCARTA_MAPK_PATHWAY         |
| BIOCARTA_MCALPAIN_PATHWAY | 24 | -0.162  | -0.00589  | 0.159  | 0.84552  | 1 | BIOCARTA_MCALPAIN_PATHWAY     |
| BIOCARTA_PPARA_PATHWAY    | 56 | 0.0827  | 0.0046    | 0.105  | 0.21566  | 1 | BIOCARTA_PPARA_PATHWAY        |
| BIOCARTA_ETS_PATHWAY      | 18 | 0.15    | 0.00474   | 0.181  | 0.20359  | 1 | BIOCARTA_ETS_PATHWAY          |
| BIOCARTA_MONOCYTE_PATHWAY | 11 | -0.53   | -0.0131   | 0.266  | 0.97676  | 1 | BIOCARTA_MONOCYTE_PATHWAY     |
| BIOCARTA_MTOR_PATHWAY     | 23 | -0.0322 | -0.00115  | 0.142  | 0.59007  | 1 | BIOCARTA_MTOR_PATHWAY         |
| BIOCARTA_IGF1R_PATHWAY    | 23 | -0.123  | -0.0044   | 0.152  | 0.79088  | 1 | BIOCARTA_IGF1R_PATHWAY        |
| BIOCARTA_PITX2_PATHWAY    | 14 | -0.114  | -0.00318  | 0.203  | 0.71337  | 1 | BIOCARTA_PITX2_PATHWAY        |
| BIOCARTA_NGF_PATHWAY      | 17 | 0.0725  | 0.00222   | 0.171  | 0.33576  | 1 | BIOCARTA_NGF_PATHWAY          |
| BIOCARTA_VIP_PATHWAY      | 26 | 0.084   | 0.00319   | 0.159  | 0.29856  | 1 | BIOCARTA_VIP_PATHWAY          |
| BIOCARTA_NFAT_PATHWAY     | 53 | -0.153  | -0.00825  | 0.107  | 0.92292  | 1 | BIOCARTA_NFAT_PATHWAY         |
| BIOCARTA_NTHI_PATHWAY     | 24 | 0.19    | 0.00692   | 0.158  | 0.11441  | 1 | BIOCARTA_NTHI_PATHWAY         |
| BIOCARTA_NFKB_PATHWAY     | 21 | 0.278   | 0.00946   | 0.157  | 0.038119 | 1 | BIOCARTA_NFKB_PATHWAY         |
| BIOCARTA_NOS1_PATHWAY     | 21 | 0.0767  | 0.00261   | 0.185  | 0.33887  | 1 | BIOCARTA_NOS1_PATHWAY         |
| BIOCARTA_NO2IL12_PATHWAY  | 16 | -0.311  | -0.00924  | 0.196  | 0.9434   | 1 | BIOCARTA_NO2IL12_PATHWAY      |
| BIOCARTA_RARRXR_PATHWAY   | 15 | -0.0409 | -0.00118  | 0.183  | 0.5886   | 1 | BIOCARTA_RARRXR_PATHWAY       |
| BIOCARTA_NUCLEARRS_PAT... | 14 | -0.098  | -0.00273  | 0.199  | 0.68876  | 1 | BIOCARTA_NUCLEARRS_PATHWAY    |
| BIOCARTA_ARENRF2_PATHWAY  | 13 | 0.163   | 0.00438   | 0.214  | 0.22298  | 1 | BIOCARTA_ARENRF2_PATHWAY      |
| BIOCARTA_P38MAPK_PATHWAY  | 39 | -0.0712 | -0.0033   | 0.119  | 0.72599  | 1 | BIOCARTA_P38MAPK_PATHWAY      |
| BIOCARTA_P53_PATHWAY      | 16 | 0.187   | 0.00557   | 0.204  | 0.17951  | 1 | BIOCARTA_P53_PATHWAY          |
| BIOCARTA_PDGF_PATHWAY     | 30 | 0.052   | 0.00212   | 0.142  | 0.35724  | 1 | BIOCARTA_PDGF_PATHWAY         |

|                           |    |         |           |       |         |   |                                 |
|---------------------------|----|---------|-----------|-------|---------|---|---------------------------------|
| BIOCARTA_CCR5_PATHWAY     | 17 | 0.0778  | 0.00239   | 0.185 | 0.33705 | 1 | BIOCARTA_CCR5_PATHWAY           |
| BIOCARTA_PTDINS_PATHWAY   | 22 | 0.0592  | 0.00206   | 0.144 | 0.34095 | 1 | BIOCARTA_PTDINS_PATHWAY         |
| BIOCARTA_PLCE_PATHWAY     | 12 | -0.307  | -0.0079   | 0.258 | 0.88299 | 1 | BIOCARTA_PLCE_PATHWAY           |
| BIOCARTA_EDG1_PATHWAY     | 26 | -0.105  | -0.004    | 0.148 | 0.76233 | 1 | BIOCARTA_EDG1_PATHWAY           |
| BIOCARTA_CDK5_PATHWAY     | 11 | -0.398  | -0.00983  | 0.235 | 0.95481 | 1 | BIOCARTA_CDK5_PATHWAY           |
| BIOCARTA_MYOSIN_PATHWAY   | 29 | 0.0768  | 0.00307   | 0.139 | 0.29025 | 1 | BIOCARTA_MYOSIN_PATHWAY         |
| BIOCARTA_PLATELETAPP_P... | 11 | -0.141  | -0.00348  | 0.239 | 0.72259 | 1 | BIOCARTA_PLATELETAPP_PATHWAY    |
| BIOCARTA_PS1_PATHWAY      | 13 | -0.244  | -0.00654  | 0.221 | 0.86474 | 1 | BIOCARTA_PS1_PATHWAY            |
| BIOCARTA_PROTEASOME_PA... | 26 | 0.105   | 0.00399   | 0.148 | 0.23872 | 1 | BIOCARTA_PROTEASOME_PATHWAY     |
| BIOCARTA_AKAPCENTROSOM... | 15 | 0.0651  | 0.00188   | 0.197 | 0.37035 | 1 | BIOCARTA_AKAPCENTROSOME_PATHWAY |
| BIOCARTA_PTEN_PATHWAY     | 18 | -0.0716 | -0.00226  | 0.162 | 0.67069 | 1 | BIOCARTA_PTEN_PATHWAY           |
| BIOCARTA_RAB_PATHWAY      | 11 | -0.224  | -0.00552  | 0.246 | 0.81819 | 1 | BIOCARTA_RAB_PATHWAY            |
| BIOCARTA_RAC1_PATHWAY     | 23 | -0.24   | -0.00855  | 0.159 | 0.93405 | 1 | BIOCARTA_RAC1_PATHWAY           |
| BIOCARTA_RAS_PATHWAY      | 21 | 0.109   | 0.00372   | 0.159 | 0.2462  | 1 | BIOCARTA_RAS_PATHWAY            |
| BIOCARTA_NKCELLS_PATHWAY  | 20 | 0.274   | 0.0091    | 0.186 | 0.07092 | 1 | BIOCARTA_NKCELLS_PATHWAY        |
| BIOCARTA_RB_PATHWAY       | 13 | 0.0693  | 0.00186   | 0.206 | 0.36835 | 1 | BIOCARTA_RB_PATHWAY             |
| BIOCARTA_CHREBP2_PATHWAY  | 41 | -0.0819 | -0.00389  | 0.115 | 0.76119 | 1 | BIOCARTA_CHREBP2_PATHWAY        |
| BIOCARTA_BAD_PATHWAY      | 25 | 0.0456  | 0.0017    | 0.153 | 0.3825  | 1 | BIOCARTA_BAD_PATHWAY            |
| BIOCARTA_CK1_PATHWAY      | 17 | -0.182  | -0.00559  | 0.193 | 0.82815 | 1 | BIOCARTA_CK1_PATHWAY            |
| BIOCARTA_EIF2_PATHWAY     | 10 | 0.256   | 0.00603   | 0.222 | 0.12441 | 1 | BIOCARTA_EIF2_PATHWAY           |
| BIOCARTA_EIF4_PATHWAY     | 24 | -0.0788 | -0.00287  | 0.146 | 0.70471 | 1 | BIOCARTA_EIF4_PATHWAY           |
| BIOCARTA_STEM_PATHWAY     | 15 | 0.0862  | 0.00248   | 0.196 | 0.3297  | 1 | BIOCARTA_STEM_PATHWAY           |
| BIOCARTA_P27_PATHWAY      | 13 | 0.269   | 0.0072    | 0.21  | 0.10057 | 1 | BIOCARTA_P27_PATHWAY            |
| BIOCARTA_PGC1A_PATHWAY    | 23 | 0.192   | 0.00683   | 0.166 | 0.12379 | 1 | BIOCARTA_PGC1A_PATHWAY          |
| BIOCARTA_PML_PATHWAY      | 17 | -0.0122 | -0.000375 | 0.173 | 0.52818 | 1 | BIOCARTA_PML_PATHWAY            |
| BIOCARTA_DREAM_PATHWAY    | 14 | -0.0459 | -0.00128  | 0.219 | 0.58295 | 1 | BIOCARTA_DREAM_PATHWAY          |
| BIOCARTA_LEPTIN_PATHWAY   | 11 | -0.152  | -0.00376  | 0.231 | 0.74577 | 1 | BIOCARTA_LEPTIN_PATHWAY         |
| BIOCARTA_RHO_PATHWAY      | 29 | -0.131  | -0.00524  | 0.143 | 0.81907 | 1 | BIOCARTA_RHO_PATHWAY            |
| BIOCARTA_AKAP13_PATHWAY   | 12 | 0.293   | 0.00756   | 0.247 | 0.11753 | 1 | BIOCARTA_AKAP13_PATHWAY         |
| BIOCARTA_ATRBRCA_PATHWAY  | 21 | -0.166  | -0.00564  | 0.175 | 0.82728 | 1 | BIOCARTA_ATRBRCA_PATHWAY        |
| BIOCARTA_HER2_PATHWAY     | 22 | -0.205  | -0.00714  | 0.155 | 0.90601 | 1 | BIOCARTA_HER2_PATHWAY           |
| BIOCARTA_ERK5_PATHWAY     | 18 | 0.0892  | 0.00282   | 0.159 | 0.28739 | 1 | BIOCARTA_ERK5_PATHWAY           |
| BIOCARTA_MAL_PATHWAY      | 19 | -0.217  | -0.00702  | 0.154 | 0.92058 | 1 | BIOCARTA_MAL_PATHWAY            |

|                           |    |         |           |       |          |   |                                |
|---------------------------|----|---------|-----------|-------|----------|---|--------------------------------|
| BIOCARTA_MEF2D_PATHWAY    | 20 | -0.0852 | -0.00283  | 0.188 | 0.67525  | 1 | BIOCARTA_MEF2D_PATHWAY         |
| BIOCARTA_MITOCHONDRIA_... | 19 | -0.0494 | -0.0016   | 0.17  | 0.61429  | 1 | BIOCARTA_MITOCHONDRIA_PATHWAY  |
| BIOCARTA_ACH_PATHWAY      | 16 | -0.0434 | -0.00129  | 0.196 | 0.58768  | 1 | BIOCARTA_ACH_PATHWAY           |
| BIOCARTA_PARKIN_PATHWAY   | 12 | 0.133   | 0.00344   | 0.239 | 0.28873  | 1 | BIOCARTA_PARKIN_PATHWAY        |
| BIOCARTA_CDC42RAC_PATHWAY | 16 | -0.0274 | -0.000816 | 0.185 | 0.55891  | 1 | BIOCARTA_CDC42RAC_PATHWAY      |
| BIOCARTA_RANMS_PATHWAY    | 10 | 0.0693  | 0.00163   | 0.305 | 0.41022  | 1 | BIOCARTA_RANMS_PATHWAY         |
| BIOCARTA_BARR_MAPK_PAT... | 12 | -0.312  | -0.00804  | 0.216 | 0.92572  | 1 | BIOCARTA_BARR_MAPK_PATHWAY     |
| BIOCARTA_TOB1_PATHWAY     | 21 | -0.201  | -0.00685  | 0.177 | 0.87215  | 1 | BIOCARTA_TOB1_PATHWAY          |
| BIOCARTA_BARRESTIN_SRC... | 15 | -0.354  | -0.0102   | 0.198 | 0.96334  | 1 | BIOCARTA_BARRESTIN_SRC_PATHWAY |
| BIOCARTA_NKT_PATHWAY      | 27 | -0.043  | -0.00166  | 0.159 | 0.60632  | 1 | BIOCARTA_NKT_PATHWAY           |
| BIOCARTA_IL1R_PATHWAY     | 32 | 0.126   | 0.00529   | 0.132 | 0.1696   | 1 | BIOCARTA_IL1R_PATHWAY          |
| BIOCARTA_MET_PATHWAY      | 36 | -0.0747 | -0.00333  | 0.133 | 0.71208  | 1 | BIOCARTA_MET_PATHWAY           |
| BIOCARTA_GPCR_PATHWAY     | 32 | -0.108  | -0.00452  | 0.135 | 0.78748  | 1 | BIOCARTA_GPCR_PATHWAY          |
| BIOCARTA_IGF1MTOR_PATHWAY | 19 | 0.0573  | 0.00186   | 0.172 | 0.3695   | 1 | BIOCARTA_IGF1MTOR_PATHWAY      |
| BIOCARTA_SODD_PATHWAY     | 10 | -0.159  | -0.00374  | 0.241 | 0.74483  | 1 | BIOCARTA_SODD_PATHWAY          |
| BIOCARTA_SHH_PATHWAY      | 16 | 0.133   | 0.00397   | 0.217 | 0.26966  | 1 | BIOCARTA_SHH_PATHWAY           |
| BIOCARTA_PTC1_PATHWAY     | 11 | 0.163   | 0.00403   | 0.217 | 0.22589  | 1 | BIOCARTA_PTC1_PATHWAY          |
| BIOCARTA_SPRY_PATHWAY     | 17 | -0.0306 | -0.000939 | 0.19  | 0.5642   | 1 | BIOCARTA_SPRY_PATHWAY          |
| BIOCARTA_BARRESTIN_PAT... | 10 | -0.0879 | -0.00207  | 0.212 | 0.66068  | 1 | BIOCARTA_BARRESTIN_PATHWAY     |
| BIOCARTA_STATHMIN_PATHWAY | 19 | 0.0969  | 0.00314   | 0.193 | 0.30813  | 1 | BIOCARTA_STATHMIN_PATHWAY      |
| BIOCARTA_HSP27_PATHWAY    | 15 | -0.159  | -0.00459  | 0.196 | 0.79242  | 1 | BIOCARTA_HSP27_PATHWAY         |
| BIOCARTA_TCR_PATHWAY      | 45 | 0.0416  | 0.00207   | 0.112 | 0.35475  | 1 | BIOCARTA_TCR_PATHWAY           |
| BIOCARTA_TCYTOTOXIC_PA... | 14 | -0.262  | -0.00728  | 0.226 | 0.87605  | 1 | BIOCARTA_TCYTOTOXIC_PATHWAY    |
| BIOCARTA_THELPER_PATHWAY  | 14 | -0.311  | -0.00865  | 0.227 | 0.9149   | 1 | BIOCARTA_THELPER_PATHWAY       |
| BIOCARTA_TALL1_PATHWAY    | 15 | 0.212   | 0.0061    | 0.207 | 0.15358  | 1 | BIOCARTA_TALL1_PATHWAY         |
| BIOCARTA_TEL_PATHWAY      | 18 | -0.154  | -0.00487  | 0.187 | 0.79563  | 1 | BIOCARTA_TEL_PATHWAY           |
| BIOCARTA_TGFB_PATHWAY     | 19 | -0.285  | -0.00922  | 0.178 | 0.94488  | 1 | BIOCARTA_TGFB_PATHWAY          |
| BIOCARTA_TH1TH2_PATHWAY   | 17 | -0.0553 | -0.0017   | 0.189 | 0.61538  | 1 | BIOCARTA_TH1TH2_PATHWAY        |
| BIOCARTA_41BB_PATHWAY     | 17 | 0.359   | 0.011     | 0.181 | 0.023284 | 1 | BIOCARTA_41BB_PATHWAY          |
| BIOCARTA_KREB_PATHWAY     | 8  | -0.0969 | -0.00204  | 0.296 | 0.62826  | 1 | BIOCARTA_KREB_PATHWAY          |
| BIOCARTA_CTLA4_PATHWAY    | 20 | -0.151  | -0.00501  | 0.181 | 0.79694  | 1 | BIOCARTA_CTLA4_PATHWAY         |
| BIOCARTA_LONGEVITY_PAT... | 15 | 0.0396  | 0.00114   | 0.183 | 0.41425  | 1 | BIOCARTA_LONGEVITY_PATHWAY     |
| BIOCARTA_SARS_PATHWAY     | 10 | -0.0313 | -0.000737 | 0.247 | 0.55039  | 1 | BIOCARTA_SARS_PATHWAY          |

|                           |    |          |           |        |          |   |                                          |
|---------------------------|----|----------|-----------|--------|----------|---|------------------------------------------|
| BIOCARTA_PAR1_PATHWAY     | 35 | 0.064    | 0.00281   | 0.129  | 0.31055  | 1 | BIOCARTA_PAR1_PATHWAY                    |
| BIOCARTA_STRESS_PATHWAY   | 24 | 0.217    | 0.00789   | 0.147  | 0.069708 | 1 | BIOCARTA_STRESS_PATHWAY                  |
| BIOCARTA_TNFR1_PATHWAY    | 29 | -0.22    | -0.00882  | 0.146  | 0.93469  | 1 | BIOCARTA_TNFR1_PATHWAY                   |
| BIOCARTA_TOLL_PATHWAY     | 33 | 0.0768   | 0.00328   | 0.118  | 0.25698  | 1 | BIOCARTA_TOLL_PATHWAY                    |
| BIOCARTA_TPO_PATHWAY      | 24 | 0.129    | 0.00471   | 0.147  | 0.18933  | 1 | BIOCARTA_TPO_PATHWAY                     |
| BIOCARTA_CREB_PATHWAY     | 27 | -0.00696 | -0.000269 | 0.146  | 0.51901  | 1 | BIOCARTA_CREB_PATHWAY                    |
| BIOCARTA_CARM1_PATHWAY    | 13 | 0.07     | 0.00188   | 0.212  | 0.37045  | 1 | BIOCARTA_CARM1_PATHWAY                   |
| BIOCARTA_TFF_PATHWAY      | 21 | -0.191   | -0.0065   | 0.162  | 0.88102  | 1 | BIOCARTA_TFF_PATHWAY                     |
| BIOCARTA_TRKA_PATHWAY     | 12 | 0.151    | 0.00389   | 0.185  | 0.20797  | 1 | BIOCARTA_TRKA_PATHWAY                    |
| BIOCARTA_ARF_PATHWAY      | 17 | -0.0177  | -0.000542 | 0.181  | 0.5389   | 1 | BIOCARTA_ARF_PATHWAY                     |
| BIOCARTA_UCALPAIN_PATHWAY | 18 | -0.149   | -0.0047   | 0.176  | 0.80073  | 1 | BIOCARTA_UCALPAIN_PATHWAY                |
| BIOCARTA_VEGF_PATHWAY     | 27 | 0.228    | 0.0088    | 0.145  | 0.057763 | 1 | BIOCARTA_VEGF_PATHWAY                    |
| BIOCARTA_VITCB_PATHWAY    | 9  | 0.651    | 0.0145    | 0.318  | 0.020267 | 1 | BIOCARTA_VITCB_PATHWAY                   |
| BIOCARTA_WNT_PATHWAY      | 25 | -0.338   | -0.0126   | 0.156  | 0.98463  | 1 | BIOCARTA_WNT_PATHWAY                     |
| BIOCARTA_ACTINY_PATHWAY   | 19 | -0.0392  | -0.00127  | 0.186  | 0.58326  | 1 | BIOCARTA_ACTINY_PATHWAY                  |
| ST_INTERFERON_GAMMA_PA... | 10 | 0.278    | 0.00654   | 0.244  | 0.12753  | 1 | ST_INTERFERON_GAMMA_PATHWAY              |
| ST_WNT_CA2_CYCLIC_GMP_... | 20 | 0.095    | 0.00316   | 0.161  | 0.27753  | 1 | ST_WNT_CA2_CYCLIC_GMP_PATHWAY            |
| ST_DIFFERENTIATION_PAT... | 41 | -0.0363  | -0.00173  | 0.115  | 0.62426  | 1 | ST_DIFFERENTIATION_PATHWAY_IN_PC12_CELLS |
| ST_TUMOR_NECROSIS_FACT... | 28 | 0.00865  | 0.00034   | 0.143  | 0.47586  | 1 | ST_TUMOR_NECROSIS_FACTOR_PATHWAY         |
| SA_B_CELL_RECEPTOR_COM... | 22 | 0.0484   | 0.00169   | 0.157  | 0.37898  | 1 | SA_B_CELL_RECEPTOR_COMPLEXES             |
| ST_ERK1_ERK2_MAPK_PATHWAY | 29 | -0.0379  | -0.00152  | 0.137  | 0.60915  | 1 | ST_ERK1_ERK2_MAPK_PATHWAY                |
| SIG_CD40PATHWAYMAP        | 33 | -0.228   | -0.00974  | 0.133  | 0.9564   | 1 | SIG_CD40PATHWAYMAP                       |
| SIG_PIP3_SIGNALING_IN_... | 63 | 0.0403   | 0.00238   | 0.0932 | 0.33273  | 1 | SIG_PIP3_SIGNALING_IN_CARDIAC_MYOCYTES   |
| SA_CASPASE_CASCADE        | 18 | -0.0662  | -0.00209  | 0.187  | 0.63852  | 1 | SA_CASPASE_CASCADE                       |
| ST_GA12_PATHWAY           | 21 | -0.126   | -0.00429  | 0.161  | 0.78242  | 1 | ST_GA12_PATHWAY                          |
| ST_G_ALPHA_S_PATHWAY      | 15 | -0.171   | -0.00493  | 0.166  | 0.84832  | 1 | ST_G_ALPHA_S_PATHWAY                     |
| ST_G_ALPHA_I_PATHWAY      | 35 | 0.15     | 0.00657   | 0.125  | 0.11659  | 1 | ST_G_ALPHA_I_PATHWAY                     |
| SIG_CHEMOTAXIS            | 40 | 0.00425  | 0.0002    | 0.117  | 0.48545  | 1 | SIG_CHEMOTAXIS                           |
| ST_IL_13_PATHWAY          | 5  | 0.737    | 0.0123    | 0.365  | 0.021623 | 1 | ST_IL_13_PATHWAY                         |
| ST_P38_MAPK_PATHWAY       | 35 | 0.0475   | 0.00209   | 0.126  | 0.35297  | 1 | ST_P38_MAPK_PATHWAY                      |
| SIG_IL4RECEPTOR_IN_B_L... | 27 | -0.0688  | -0.00266  | 0.139  | 0.68949  | 1 | SIG_IL4RECEPTOR_IN_B_LYPHOCYTES          |
| WNT_SIGNALING             | 86 | -0.114   | -0.00785  | 0.0875 | 0.90364  | 1 | WNT_SIGNALING                            |
| ST_JAK_STAT_PATHWAY       | 9  | 0.218    | 0.00488   | 0.218  | 0.15832  | 1 | ST_JAK_STAT_PATHWAY                      |

|                           |    |          |           |        |          |   |                                               |
|---------------------------|----|----------|-----------|--------|----------|---|-----------------------------------------------|
| SIG_REGULATION_OF_THE_... | 31 | -0.0628  | -0.0026   | 0.13   | 0.68483  | 1 | SIG_REGULATION_OF_THE_ACTIN_CYTOSKELETON_BY_R |
| ST_GRANULE_CELL_SURVIV... | 26 | -0.0364  | -0.00138  | 0.15   | 0.59623  | 1 | HO_GTPASES                                    |
| ST_ADRENERGIC             | 33 | -0.00202 | -8.62E-05 | 0.137  | 0.50587  | 1 | ST_GRANULE_CELL_SURVIVAL_PATHWAY              |
| ST_INTEGRIN_SIGNALING_... | 79 | -0.0205  | -0.00135  | 0.0834 | 0.5972   | 1 | ST_ADRENERGIC                                 |
| ST_GAQ_PATHWAY            | 26 | 0.0933   | 0.00354   | 0.152  | 0.26921  | 1 | ST_INTEGRIN_SIGNALING_PATHWAY                 |
| ST_GA13_PATHWAY           | 35 | -0.0752  | -0.00331  | 0.134  | 0.7123   | 1 | ST_GAQ_PATHWAY                                |
| ST_STAT3_PATHWAY          | 11 | 0.201    | 0.00495   | 0.23   | 0.19195  | 1 | ST_GA13_PATHWAY                               |
| SA_FAS_SIGNALING          | 9  | 0.152    | 0.0034    | 0.248  | 0.26933  | 1 | ST_STAT3_PATHWAY                              |
| SA_G1_AND_S_PHASES        | 15 | -0.246   | -0.00709  | 0.189  | 0.90382  | 1 | SA_FAS_SIGNALING                              |
|                           |    |          |           |        |          |   | SA_G1_AND_S_PHASES                            |
|                           |    |          |           |        |          |   | SIG_INSULIN_RECEPTOR_PATHWAY_IN_CARDIAC_MYOCY |
| SIG_INSULIN_RECEPTOR_P... | 48 | -0.0448  | -0.00231  | 0.114  | 0.65301  | 1 | TES                                           |
| ST_T_CELL_SIGNAL_TRANS... | 44 | 0.0111   | 0.000545  | 0.115  | 0.46171  | 1 | SIG_INSULIN_RECEPTOR_PATHWAY_IN_CARDIAC_MYOCY |
| ST_TYPE_I_INTERFERON_P... | 9  | 0.234    | 0.00523   | 0.283  | 0.20341  | 1 | ST_T_CELL_SIGNAL_TRANSDUCTION                 |
| ST_PAC1_RECEPTOR_PATHWAY  | 6  | 0.207    | 0.00377   | 0.299  | 0.24492  | 1 | ST_TYPE_I_INTERFERON_PATHWAY                  |
| SIG_PIP3_SIGNALING_IN_... | 34 | -0.0618  | -0.00268  | 0.135  | 0.67592  | 1 | ST_PAC1_RECEPTOR_PATHWAY                      |
| SIG_BCR_SIGNALING_PATHWAY | 44 | -0.107   | -0.00529  | 0.11   | 0.83583  | 1 | SIG_PIP3_SIGNALING_IN_B_LYMPHOCYTES           |
| SA_G2_AND_M_PHASES        | 8  | 0.399    | 0.00839   | 0.264  | 0.065209 | 1 | SIG_BCR_SIGNALING_PATHWAY                     |
| ST_B_CELL_ANTIGEN_RECE... | 39 | -0.0378  | -0.00175  | 0.114  | 0.62987  | 1 | SA_G2_AND_M_PHASES                            |
| ST_INTERLEUKIN_4_PATHWAY  | 23 | 0.0797   | 0.00284   | 0.138  | 0.28198  | 1 | ST_B_CELL_ANTIGEN_RECEPTOR                    |
| ST_WNT_BETA_CATENIN_PA... | 34 | -0.302   | -0.0131   | 0.136  | 0.98697  | 1 | ST_INTERLEUKIN_4_PATHWAY                      |
| SA_MMP_CYTOKINE_CONNEC... | 15 | -0.17    | -0.00491  | 0.215  | 0.78655  | 1 | ST_WNT_BETA_CATENIN_PATHWAY                   |
| ST_JNK_MAPK_PATHWAY       | 39 | -0.0265  | -0.00123  | 0.115  | 0.59118  | 1 | SA_MMP_CYTOKINE_CONNECTION                    |
| SA_PROGRAMMED_CELL_DEATH  | 12 | 0.252    | 0.00649   | 0.226  | 0.13222  | 1 | ST_JNK_MAPK_PATHWAY                           |
| ST_FAS_SIGNALING_PATHWAY  | 63 | -0.16    | -0.00944  | 0.099  | 0.94714  | 1 | SA_PROGRAMMED_CELL_DEATH                      |
| ST_MYOCYTE_AD_PATHWAY     | 26 | 0.149    | 0.00566   | 0.144  | 0.15014  | 1 | ST_FAS_SIGNALING_PATHWAY                      |
| SA_PTEN_PATHWAY           | 17 | 0.0952   | 0.00292   | 0.168  | 0.28519  | 1 | ST_MYOCYTE_AD_PATHWAY                         |
| SA_REG_CASCADE_OF_CYCL... | 13 | 0.141    | 0.00379   | 0.185  | 0.22249  | 1 | SA_PTEN_PATHWAY                               |
| SA_TRKA_RECEPTOR          | 16 | -0.0368  | -0.00109  | 0.182  | 0.57994  | 1 | SA_REG_CASCADE_OF_CYCLIN_EXPR                 |
| ST_PHOSPHOINOSITIDE_3_... | 34 | 0.0804   | 0.00348   | 0.123  | 0.25597  | 1 | SA_TRKA_RECEPTOR                              |
| PID_FANCONI_PATHWAY       | 46 | -0.108   | -0.00542  | 0.112  | 0.83152  | 1 | ST_PHOSPHOINOSITIDE_3_KINASE_PATHWAY          |
| PID_SMAD2_3NUCLEAR_PAT... | 76 | -0.0331  | -0.00214  | 0.0913 | 0.6413   | 1 | PID_FANCONI_PATHWAY                           |
| PID_FCER1_PATHWAY         | 58 | 0.0972   | 0.0055    | 0.0956 | 0.15468  | 1 | PID_SMAD2_3NUCLEAR_PATHWAY                    |
|                           |    |          |           |        |          |   | PID_FCER1_PATHWAY                             |



|                           |    |          |           |        |          |   |                                  |
|---------------------------|----|----------|-----------|--------|----------|---|----------------------------------|
| PID_ENDOTHELIN_PATHWAY    | 62 | 0.0244   | 0.00143   | 0.104  | 0.40763  | 1 | PID_ENDOTHELIN_PATHWAY           |
| PID_BCR_5PATHWAY          | 61 | 0.139    | 0.00807   | 0.0942 | 0.069748 | 1 | PID_BCR_5PATHWAY                 |
| PID_PRL_SIGNALING_EVEN... | 23 | -0.148   | -0.00529  | 0.154  | 0.83296  | 1 | PID_PRL_SIGNALING_EVENTS_PATHWAY |
| PID_RHOA_PATHWAY          | 44 | -0.0595  | -0.00293  | 0.117  | 0.69438  | 1 | PID_RHOA_PATHWAY                 |
| PID_ERBB4_PATHWAY         | 38 | 0.0464   | 0.00212   | 0.128  | 0.35873  | 1 | PID_ERBB4_PATHWAY                |
| PID_AURORA_B_PATHWAY      | 38 | -0.0496  | -0.00227  | 0.125  | 0.65407  | 1 | PID_AURORA_B_PATHWAY             |
| PID_LYSOPHOSPHOLIPID_P... | 65 | -0.0377  | -0.00226  | 0.0954 | 0.6537   | 1 | PID_LYSOPHOSPHOLIPID_PATHWAY     |
| PID_INSULIN_PATHWAY       | 44 | -0.114   | -0.00559  | 0.118  | 0.83226  | 1 | PID_INSULIN_PATHWAY              |
| PID_NOTCH_PATHWAY         | 59 | 0.000627 | 3.58E-05  | 0.0966 | 0.49741  | 1 | PID_NOTCH_PATHWAY                |
| PID_INTEGRIN1_PATHWAY     | 64 | -0.0278  | -0.00165  | 0.107  | 0.60253  | 1 | PID_INTEGRIN1_PATHWAY            |
| PID_P73PATHWAY            | 78 | -0.014   | -0.000917 | 0.0816 | 0.56803  | 1 | PID_P73PATHWAY                   |
| PID_P38_MKK3_6PATHWAY     | 26 | 0.232    | 0.00878   | 0.157  | 0.070419 | 1 | PID_P38_MKK3_6PATHWAY            |
| PID_GMCSF_PATHWAY         | 35 | 0.0244   | 0.00107   | 0.124  | 0.42196  | 1 | PID_GMCSF_PATHWAY                |
| PID_WNT_NONCANONICAL_P... | 31 | -0.0268  | -0.00111  | 0.133  | 0.5796   | 1 | PID_WNT_NONCANONICAL_PATHWAY     |
| PID_IL4_2PATHWAY          | 57 | 0.0975   | 0.00547   | 0.103  | 0.17077  | 1 | PID_IL4_2PATHWAY                 |
| PID_HDAC_CLASSII_PATHWAY  | 31 | -0.0977  | -0.00404  | 0.133  | 0.76933  | 1 | PID_HDAC_CLASSII_PATHWAY         |
| PID_BETA_CATENIN_DEG_P... | 18 | -0.338   | -0.0107   | 0.173  | 0.97499  | 1 | PID_BETA_CATENIN_DEG_PATHWAY     |
| PID_HDAC_CLASSIII_PATHWAY | 24 | -0.146   | -0.0053   | 0.157  | 0.82379  | 1 | PID_HDAC_CLASSIII_PATHWAY        |
| PID_GLYPICAN_1PATHWAY     | 27 | -0.0825  | -0.00319  | 0.151  | 0.70823  | 1 | PID_GLYPICAN_1PATHWAY            |
| PID_TCR_PATHWAY           | 61 | 0.153    | 0.00888   | 0.0908 | 0.045795 | 1 | PID_TCR_PATHWAY                  |
| PID_IL27_PATHWAY          | 26 | -0.144   | -0.00545  | 0.153  | 0.82594  | 1 | PID_IL27_PATHWAY                 |
| PID_NFKAPPAB_CANONICAL... | 22 | 0.318    | 0.0111    | 0.161  | 0.024188 | 1 | PID_NFKAPPAB_CANONICAL_PATHWAY   |
| PID_E2F_PATHWAY           | 70 | 0.0423   | 0.00263   | 0.0921 | 0.32305  | 1 | PID_E2F_PATHWAY                  |
| PID_ER_NONGENOMIC_PATHWAY | 40 | -0.207   | -0.00974  | 0.113  | 0.96691  | 1 | PID_ER_NONGENOMIC_PATHWAY        |
| PID_DNA_PK_PATHWAY        | 16 | 0.299    | 0.00889   | 0.198  | 0.066146 | 1 | PID_DNA_PK_PATHWAY               |
| PID_HIF2PATHWAY           | 32 | 0.217    | 0.00914   | 0.133  | 0.051547 | 1 | PID_HIF2PATHWAY                  |
| PID_CD40_PATHWAY          | 30 | 0.139    | 0.00564   | 0.145  | 0.17041  | 1 | PID_CD40_PATHWAY                 |
| PID_ATR_PATHWAY           | 39 | -0.148   | -0.00686  | 0.116  | 0.89831  | 1 | PID_ATR_PATHWAY                  |
| PID_INTEGRIN_CS_PATHWAY   | 26 | -0.0338  | -0.00128  | 0.155  | 0.58599  | 1 | PID_INTEGRIN_CS_PATHWAY          |
| PID_MET_PATHWAY           | 78 | 0.0685   | 0.00449   | 0.0839 | 0.20725  | 1 | PID_MET_PATHWAY                  |
| PID_PTP1B_PATHWAY         | 52 | 0.0949   | 0.00508   | 0.108  | 0.19016  | 1 | PID_PTP1B_PATHWAY                |
| PID_INTEGRIN3_PATHWAY     | 40 | 0.2      | 0.00942   | 0.136  | 0.070219 | 1 | PID_INTEGRIN3_PATHWAY            |

|                           |    |          |           |        |          |   |                                   |
|---------------------------|----|----------|-----------|--------|----------|---|-----------------------------------|
| PID_IL12_2PATHWAY         | 61 | -0.0706  | -0.0041   | 0.104  | 0.7509   | 1 | PID_IL12_2PATHWAY                 |
| PID_S1P_S1P3_PATHWAY      | 29 | 0.175    | 0.007     | 0.149  | 0.12095  | 1 | PID_S1P_S1P3_PATHWAY              |
| PID_LPA4_PATHWAY          | 14 | -0.124   | -0.00346  | 0.219  | 0.71486  | 1 | PID_LPA4_PATHWAY                  |
| PID_AR_PATHWAY            | 58 | -0.108   | -0.0061   | 0.0988 | 0.86246  | 1 | PID_AR_PATHWAY                    |
| PID_NFAT_TFPATHWAY        | 43 | 0.0633   | 0.00309   | 0.117  | 0.29346  | 1 | PID_NFAT_TFPATHWAY                |
| PID_EPHB_FWD_PATHWAY      | 39 | -0.0154  | -0.000715 | 0.118  | 0.55201  | 1 | PID_EPHB_FWD_PATHWAY              |
| PID_AVB3_OPN_PATHWAY      | 31 | 0.143    | 0.00593   | 0.138  | 0.14991  | 1 | PID_AVB3_OPN_PATHWAY              |
| PID_S1P_S1P4_PATHWAY      | 14 | 0.0754   | 0.0021    | 0.19   | 0.34617  | 1 | PID_S1P_S1P4_PATHWAY              |
| PID_FRA_PATHWAY           | 35 | 0.103    | 0.00453   | 0.126  | 0.20751  | 1 | PID_FRA_PATHWAY                   |
| PID_MYC_ACTIV_PATHWAY     | 77 | 0.0172   | 0.00112   | 0.0886 | 0.42302  | 1 | PID_MYC_ACTIV_PATHWAY             |
| PID_ARF6_TRAFFICKING_P... | 48 | -0.14    | -0.0072   | 0.115  | 0.88721  | 1 | PID_ARF6_TRAFFICKING_PATHWAY      |
| PID_RHOA_REG_PATHWAY      | 42 | -0.0193  | -0.000928 | 0.121  | 0.56335  | 1 | PID_RHOA_REG_PATHWAY              |
| PID_REELIN_PATHWAY        | 29 | -0.136   | -0.00544  | 0.145  | 0.82628  | 1 | PID_REELIN_PATHWAY                |
| PID_PS1_PATHWAY           | 45 | -0.0343  | -0.00171  | 0.114  | 0.61781  | 1 | PID_PS1_PATHWAY                   |
| PID_ILK_PATHWAY           | 44 | 0.0621   | 0.00306   | 0.107  | 0.28094  | 1 | PID_ILK_PATHWAY                   |
| PID_NECTIN_PATHWAY        | 30 | -0.00211 | -8.58E-05 | 0.14   | 0.506    | 1 | PID_NECTIN_PATHWAY                |
| PID_P38_ALPHA_BETA_PAT... | 30 | -0.00544 | -0.000221 | 0.14   | 0.51553  | 1 | PID_P38_ALPHA_BETA_PATHWAY        |
| PID_WNT_SIGNALING_PATHWAY | 26 | -0.166   | -0.0063   | 0.153  | 0.86175  | 1 | PID_WNT_SIGNALING_PATHWAY         |
| PID_TRAIL_PATHWAY         | 27 | 0.303    | 0.0117    | 0.154  | 0.024483 | 1 | PID_TRAIL_PATHWAY                 |
| PID_CDC42_PATHWAY         | 69 | -0.0874  | -0.00539  | 0.0932 | 0.82575  | 1 | PID_CDC42_PATHWAY                 |
| PID_RET_PATHWAY           | 39 | -0.0277  | -0.00128  | 0.124  | 0.58859  | 1 | PID_RET_PATHWAY                   |
| PID_CDC42_REG_PATHWAY     | 25 | 0.185    | 0.00687   | 0.145  | 0.10064  | 1 | PID_CDC42_REG_PATHWAY             |
| PID_ATM_PATHWAY           | 33 | 0.106    | 0.00453   | 0.126  | 0.20041  | 1 | PID_ATM_PATHWAY                   |
| PID_ARF6_PATHWAY          | 35 | 0.205    | 0.00901   | 0.136  | 0.065444 | 1 | PID_ARF6_PATHWAY                  |
| PID_LKB1_PATHWAY          | 46 | 0.169    | 0.00849   | 0.109  | 0.06178  | 1 | PID_LKB1_PATHWAY                  |
| PID_CD8_TCR_PATHWAY       | 52 | 0.142    | 0.00759   | 0.101  | 0.080892 | 1 | PID_CD8_TCR_PATHWAY               |
| PID_WNT_CANONICAL_PATHWAY | 20 | -0.475   | -0.0158   | 0.157  | 0.99872  | 1 | PID_WNT_CANONICAL_PATHWAY         |
| PID_TCPTP_PATHWAY         | 43 | -0.106   | -0.00515  | 0.119  | 0.81231  | 1 | PID_TCPTP_PATHWAY                 |
| PID_ANGIOPOIETIN_RECEP... | 48 | -0.086   | -0.00443  | 0.108  | 0.78609  | 1 | PID_ANGIOPOIETIN_RECEPTOR_PATHWAY |
| PID_FAS_PATHWAY           | 36 | 0.21     | 0.00937   | 0.137  | 0.061905 | 1 | PID_FAS_PATHWAY                   |
| PID_CIRCADIAN_PATHWAY     | 15 | -0.175   | -0.00505  | 0.209  | 0.79965  | 1 | PID_CIRCADIAN_PATHWAY             |
| PID_TXA2PATHWAY           | 56 | 0.122    | 0.00681   | 0.107  | 0.12594  | 1 | PID_TXA2PATHWAY                   |

|                           |     |          |           |        |          |   |                                     |
|---------------------------|-----|----------|-----------|--------|----------|---|-------------------------------------|
| PID_SHP2_PATHWAY          | 57  | 0.0117   | 0.000655  | 0.102  | 0.45441  | 1 | PID_SHP2_PATHWAY                    |
| PID_HDAC_CLASSI_PATHWAY   | 62  | -0.0439  | -0.00257  | 0.0939 | 0.67988  | 1 | PID_HDAC_CLASSI_PATHWAY             |
| PID_S1P_S1P1_PATHWAY      | 21  | 0.194    | 0.0066    | 0.16   | 0.11286  | 1 | PID_S1P_S1P1_PATHWAY                |
| PID_TELOMERASE_PATHWAY    | 66  | 0.143    | 0.00863   | 0.0969 | 0.069936 | 1 | PID_TELOMERASE_PATHWAY              |
| PID_HNF3B_PATHWAY         | 44  | 0.101    | 0.005     | 0.113  | 0.18563  | 1 | PID_HNF3B_PATHWAY                   |
| PID_NETRIN_PATHWAY        | 32  | -0.0171  | -0.000721 | 0.135  | 0.55063  | 1 | PID_NETRIN_PATHWAY                  |
| PID_NFAT_3PATHWAY         | 54  | 0.0784   | 0.00428   | 0.111  | 0.23997  | 1 | PID_NFAT_3PATHWAY                   |
| PID_REG_GR_PATHWAY        | 81  | 0.0979   | 0.00654   | 0.0839 | 0.12165  | 1 | PID_REG_GR_PATHWAY                  |
| PID_INTEGRIN_A9B1_PATHWAY | 22  | -0.0952  | -0.00332  | 0.175  | 0.70647  | 1 | PID_INTEGRIN_A9B1_PATHWAY           |
| PID_ERB_GENOMIC_PATHWAY   | 14  | 0.0391   | 0.00109   | 0.206  | 0.42483  | 1 | PID_ERB_GENOMIC_PATHWAY             |
| PID_ARF6_DOWNSTREAM_PA... | 15  | 0.00884  | 0.000255  | 0.213  | 0.48343  | 1 | PID_ARF6_DOWNSTREAM_PATHWAY         |
| PID_MTOR_4PATHWAY         | 68  | 0.0898   | 0.0055    | 0.087  | 0.15104  | 1 | PID_MTOR_4PATHWAY                   |
| PID_IL2_1PATHWAY          | 54  | -0.00103 | -5.61E-05 | 0.106  | 0.50388  | 1 | PID_IL2_1PATHWAY                    |
| PID_CXCR4_PATHWAY         | 99  | 0.0156   | 0.00115   | 0.0744 | 0.41687  | 1 | PID_CXCR4_PATHWAY                   |
| PID_IGF1_PATHWAY          | 30  | -0.237   | -0.00965  | 0.135  | 0.96023  | 1 | PID_IGF1_PATHWAY                    |
| PID_ERBB1_RECEPTOR_PRO... | 35  | -0.0412  | -0.00181  | 0.117  | 0.63804  | 1 | PID_ERBB1_RECEPTOR_PROXIMAL_PATHWAY |
| PID_TNF_PATHWAY           | 44  | 0.115    | 0.00568   | 0.108  | 0.14265  | 1 | PID_TNF_PATHWAY                     |
| PID_PLK1_PATHWAY          | 44  | -0.0314  | -0.00155  | 0.105  | 0.61749  | 1 | PID_PLK1_PATHWAY                    |
| PID_TCR_RAS_PATHWAY       | 13  | -0.352   | -0.00943  | 0.205  | 0.95687  | 1 | PID_TCR_RAS_PATHWAY                 |
| PID_IL5_PATHWAY           | 14  | -0.0282  | -0.000785 | 0.213  | 0.55256  | 1 | PID_IL5_PATHWAY                     |
| PID_FOXO_PATHWAY          | 48  | 0.227    | 0.0117    | 0.113  | 0.021816 | 1 | PID_FOXO_PATHWAY                    |
| PID_VEGF_VEGFR_PATHWAY    | 9   | 0.239    | 0.00534   | 0.291  | 0.20584  | 1 | PID_VEGF_VEGFR_PATHWAY              |
| PID_THROMBIN_PAR4_PATHWAY | 15  | -0.0686  | -0.00198  | 0.196  | 0.63664  | 1 | PID_THROMBIN_PAR4_PATHWAY           |
| PID_MYC_PATHWAY           | 25  | -0.153   | -0.00569  | 0.142  | 0.86025  | 1 | PID_MYC_PATHWAY                     |
| PID_RANBP2_PATHWAY        | 11  | -0.21    | -0.00518  | 0.208  | 0.84421  | 1 | PID_RANBP2_PATHWAY                  |
| PID_PI3KCI_PATHWAY        | 47  | -0.171   | -0.00869  | 0.108  | 0.94366  | 1 | PID_PI3KCI_PATHWAY                  |
| PID_AJDISS_2PATHWAY       | 47  | 0.11     | 0.00559   | 0.128  | 0.19497  | 1 | PID_AJDISS_2PATHWAY                 |
| PID_IL2_PI3K_PATHWAY      | 33  | 0.085    | 0.00363   | 0.118  | 0.23536  | 1 | PID_IL2_PI3K_PATHWAY                |
| PID_CERAMIDE_PATHWAY      | 46  | -0.0221  | -0.00111  | 0.108  | 0.581    | 1 | PID_CERAMIDE_PATHWAY                |
| PID_P53_DOWNSTREAM_PAT... | 135 | -0.0149  | -0.00128  | 0.0655 | 0.58992  | 1 | PID_P53_DOWNSTREAM_PATHWAY          |
| PID_AR_TF_PATHWAY         | 50  | -0.11    | -0.00575  | 0.107  | 0.8475   | 1 | PID_AR_TF_PATHWAY                   |
| PID_P75_NTR_PATHWAY       | 62  | 0.145    | 0.0085    | 0.0936 | 0.060258 | 1 | PID_P75_NTR_PATHWAY                 |
| PID_S1P_META_PATHWAY      | 21  | 0.0902   | 0.00307   | 0.179  | 0.30749  | 1 | PID_S1P_META_PATHWAY                |

|                           |     |          |           |        |          |   |                                    |
|---------------------------|-----|----------|-----------|--------|----------|---|------------------------------------|
| PID_ECADHERIN_NASCENT_... | 39  | 0.0415   | 0.00193   | 0.129  | 0.37347  | 1 | PID_ECADHERIN_NASCENT_AJ_PATHWAY   |
| PID_INTEGRIN4_PATHWAY     | 11  | 0.272    | 0.0067    | 0.261  | 0.14881  | 1 | PID_INTEGRIN4_PATHWAY              |
| PID_AMB2_NEUTROPHILS_P... | 41  | -0.218   | -0.0104   | 0.119  | 0.96612  | 1 | PID_AMB2_NEUTROPHILS_PATHWAY       |
| PID_AVB3_INTEGRIN_PATHWAY | 73  | -0.077   | -0.00488  | 0.0908 | 0.8017   | 1 | PID_AVB3_INTEGRIN_PATHWAY          |
| PID_IFNG_PATHWAY          | 40  | -0.0201  | -0.000945 | 0.115  | 0.56937  | 1 | PID_IFNG_PATHWAY                   |
| PID_RXR_VDR_PATHWAY       | 26  | 0.106    | 0.00403   | 0.162  | 0.25593  | 1 | PID_RXR_VDR_PATHWAY                |
| PID_LIS1_PATHWAY          | 27  | 0.2      | 0.00774   | 0.146  | 0.085537 | 1 | PID_LIS1_PATHWAY                   |
| PID_ERBB1_DOWNSTREAM_P... | 103 | -0.0484  | -0.00364  | 0.0723 | 0.74833  | 1 | PID_ERBB1_DOWNSTREAM_PATHWAY       |
| PID_SYNDECAN_4_PATHWAY    | 32  | -0.0416  | -0.00175  | 0.138  | 0.61871  | 1 | PID_SYNDECAN_4_PATHWAY             |
| PID_ATF2_PATHWAY          | 59  | -0.138   | -0.00789  | 0.102  | 0.91164  | 1 | PID_ATF2_PATHWAY                   |
| PID_AP1_PATHWAY           | 69  | -0.0592  | -0.00365  | 0.0944 | 0.73474  | 1 | PID_AP1_PATHWAY                    |
| PID_INTEGRIN2_PATHWAY     | 27  | -0.139   | -0.00536  | 0.162  | 0.80341  | 1 | PID_INTEGRIN2_PATHWAY              |
| PID_UPA_UPAR_PATHWAY      | 42  | 0.00832  | 0.0004    | 0.133  | 0.475    | 1 | PID_UPA_UPAR_PATHWAY               |
| PID_ERBB2_ERBB3_PATHWAY   | 44  | -0.0283  | -0.0014   | 0.109  | 0.60252  | 1 | PID_ERBB2_ERBB3_PATHWAY            |
| PID_FOXM1_PATHWAY         | 40  | 0.0173   | 0.000815  | 0.119  | 0.44183  | 1 | PID_FOXM1_PATHWAY                  |
| PID_EPHA_FWDPATHWAY       | 34  | 0.24     | 0.0104    | 0.138  | 0.040945 | 1 | PID_EPHA_FWDPATHWAY                |
| PID_HIF1A_PATHWAY         | 18  | 0.0905   | 0.00286   | 0.189  | 0.31589  | 1 | PID_HIF1A_PATHWAY                  |
| PID_BMP_PATHWAY           | 40  | -0.0342  | -0.00161  | 0.13   | 0.60359  | 1 | PID_BMP_PATHWAY                    |
| PID_IL3_PATHWAY           | 25  | 0.0484   | 0.0018    | 0.144  | 0.36797  | 1 | PID_IL3_PATHWAY                    |
| PID_IL6_7_PATHWAY         | 45  | -0.0164  | -0.000818 | 0.111  | 0.55863  | 1 | PID_IL6_7_PATHWAY                  |
| PID_ECADHERIN_KERATINO... | 21  | 0.0485   | 0.00165   | 0.162  | 0.38214  | 1 | PID_ECADHERIN_KERATINOCYTE_PATHWAY |
| PID_ALK1_PATHWAY          | 26  | -0.0533  | -0.00202  | 0.142  | 0.64663  | 1 | PID_ALK1_PATHWAY                   |
| PID_PDGFRB_PATHWAY        | 127 | -0.0034  | -0.000284 | 0.0677 | 0.52005  | 1 | PID_PDGFRB_PATHWAY                 |
| PID_TRKR_PATHWAY          | 61  | 0.162    | 0.0094    | 0.0923 | 0.039544 | 1 | PID_TRKR_PATHWAY                   |
| PID_TCR_JNK_PATHWAY       | 14  | 0.209    | 0.00583   | 0.196  | 0.14203  | 1 | PID_TCR_JNK_PATHWAY                |
| PID_NEPHRIN_NEPH1_PATHWAY | 31  | 0.0792   | 0.00328   | 0.132  | 0.27363  | 1 | PID_NEPHRIN_NEPH1_PATHWAY          |
| PID_CMYB_PATHWAY          | 80  | -0.0143  | -0.00095  | 0.0856 | 0.56637  | 1 | PID_CMYB_PATHWAY                   |
| PID_IL23_PATHWAY          | 37  | -0.00916 | -0.000414 | 0.137  | 0.52658  | 1 | PID_IL23_PATHWAY                   |
| PID_HIV_NEF_PATHWAY       | 35  | -0.0953  | -0.00419  | 0.127  | 0.77327  | 1 | PID_HIV_NEF_PATHWAY                |
| PID_SYNDECAN_1_PATHWAY    | 43  | 0.0677   | 0.0033    | 0.123  | 0.29157  | 1 | PID_SYNDECAN_1_PATHWAY             |
| PID_P38_MK2_PATHWAY       | 21  | -0.114   | -0.0039   | 0.158  | 0.7656   | 1 | PID_P38_MK2_PATHWAY                |
| PID_ERA_GENOMIC_PATHWAY   | 63  | -0.0198  | -0.00116  | 0.0958 | 0.58171  | 1 | PID_ERA_GENOMIC_PATHWAY            |
| PID_ERBB_NETWORK_PATHWAY  | 15  | 0.274    | 0.0079    | 0.217  | 0.10338  | 1 | PID_ERBB_NETWORK_PATHWAY           |

|                           |    |         |           |        |          |   |                                       |
|---------------------------|----|---------|-----------|--------|----------|---|---------------------------------------|
| PID_ALK2_PATHWAY          | 11 | 0.146   | 0.00361   | 0.277  | 0.29842  | 1 | PID_ALK2_PATHWAY                      |
| PID_RHODOPSIN_PATHWAY     | 22 | 0.0796  | 0.00277   | 0.144  | 0.28967  | 1 | PID_RHODOPSIN_PATHWAY                 |
| PID_PDGFRA_PATHWAY        | 21 | 0.115   | 0.00393   | 0.151  | 0.22152  | 1 | PID_PDGFRA_PATHWAY                    |
| PID_RETINOIC_ACID_PATHWAY | 30 | 0.00807 | 0.000329  | 0.152  | 0.47888  | 1 | PID_RETINOIC_ACID_PATHWAY             |
| PID_P38_GAMMA_DELTA_PA... | 11 | -0.199  | -0.0049   | 0.234  | 0.802    | 1 | PID_P38_GAMMA_DELTA_PATHWAY           |
| PID_IL8_CXCR2_PATHWAY     | 34 | 0.0364  | 0.00158   | 0.133  | 0.39209  | 1 | PID_IL8_CXCR2_PATHWAY                 |
| PID_HEDGEHOG_2PATHWAY     | 22 | 0.243   | 0.00849   | 0.168  | 0.07338  | 1 | PID_HEDGEHOG_2PATHWAY                 |
| PID_INTEGRIN5_PATHWAY     | 17 | 0.135   | 0.00414   | 0.197  | 0.24651  | 1 | PID_INTEGRIN5_PATHWAY                 |
| PID_AR_NONGENOMIC_PATHWAY | 30 | -0.209  | -0.00849  | 0.122  | 0.95625  | 1 | PID_AR_NONGENOMIC_PATHWAY             |
| PID_ERBB1_INTERNALIZAT... | 40 | -0.028  | -0.00132  | 0.12   | 0.59258  | 1 | PID_ERBB1_INTERNALIZATION_PATHWAY     |
| PID_HEDGEHOG_GLI_PATHWAY  | 47 | 0.0286  | 0.00146   | 0.112  | 0.39899  | 1 | PID_HEDGEHOG_GLI_PATHWAY              |
| PID_CASPASE_PATHWAY       | 51 | -0.0508 | -0.0027   | 0.106  | 0.68485  | 1 | PID_CASPASE_PATHWAY                   |
| PID_CXCR3_PATHWAY         | 42 | -0.171  | -0.00823  | 0.113  | 0.9348   | 1 | PID_CXCR3_PATHWAY                     |
| PID_BETA_CATENIN_NUC_P... | 74 | -0.0421 | -0.00269  | 0.0954 | 0.67043  | 1 | PID_BETA_CATENIN_NUC_PATHWAY          |
| PID_VEGFR1_PATHWAY        | 26 | 0.0774  | 0.00293   | 0.154  | 0.30759  | 1 | PID_VEGFR1_PATHWAY                    |
| PID_SMAD2_3PATHWAY        | 17 | -0.154  | -0.00472  | 0.187  | 0.79454  | 1 | PID_SMAD2_3PATHWAY                    |
| PID_P38_ALPHA_BETA_DOW... | 37 | -0.0728 | -0.00329  | 0.123  | 0.72343  | 1 | PID_P38_ALPHA_BETA_DOWNSTREAM_PATHWAY |
| PID_KIT_PATHWAY           | 52 | 0.0327  | 0.00175   | 0.109  | 0.38234  | 1 | PID_KIT_PATHWAY                       |
| PID_ECADHERIN_STABILIZ... | 42 | -0.0199 | -0.000957 | 0.121  | 0.56504  | 1 | PID_ECADHERIN_STABILIZATION_PATHWAY   |
| PID_EPO_PATHWAY           | 32 | 0.0971  | 0.00408   | 0.132  | 0.23029  | 1 | PID_EPO_PATHWAY                       |
| PID_IL2_STAT5_PATHWAY     | 28 | 0.177   | 0.00698   | 0.135  | 0.093632 | 1 | PID_IL2_STAT5_PATHWAY                 |
| PID_TCR_CALCIIUM_PATHWAY  | 28 | 0.0264  | 0.00104   | 0.156  | 0.43282  | 1 | PID_TCR_CALCIIUM_PATHWAY              |
| PID_DELTA_NP63_PATHWAY    | 46 | 0.00196 | 9.87E-05  | 0.109  | 0.49283  | 1 | PID_DELTA_NP63_PATHWAY                |
| PID_VEGFR1_2_PATHWAY      | 69 | -0.117  | -0.00719  | 0.0946 | 0.89095  | 1 | PID_VEGFR1_2_PATHWAY                  |
| PID_THROMBIN_PAR1_PATHWAY | 43 | -0.0309 | -0.00151  | 0.118  | 0.60296  | 1 | PID_THROMBIN_PAR1_PATHWAY             |
| PID_A6B1_A6B4_INTEGRIN... | 46 | 0.135   | 0.00683   | 0.118  | 0.12619  | 1 | PID_A6B1_A6B4_INTEGRIN_PATHWAY        |
| PID_SYNDECAN_2_PATHWAY    | 32 | 0.0842  | 0.00354   | 0.139  | 0.27197  | 1 | PID_SYNDECAN_2_PATHWAY                |
| PID_RAC1_REG_PATHWAY      | 36 | 0.22    | 0.00983   | 0.136  | 0.052377 | 1 | PID_RAC1_REG_PATHWAY                  |
| PID_AURORA_A_PATHWAY      | 31 | -0.0837 | -0.00347  | 0.128  | 0.74284  | 1 | PID_AURORA_A_PATHWAY                  |
| PID_ARF_3PATHWAY          | 19 | -0.244  | -0.00791  | 0.157  | 0.93968  | 1 | PID_ARF_3PATHWAY                      |
| PID_INSULIN_GLUCOSE_PA... | 26 | -0.124  | -0.00471  | 0.15   | 0.79565  | 1 | PID_INSULIN_GLUCOSE_PATHWAY           |
| PID_PI3KCI_AKT_PATHWAY    | 34 | 0.071   | 0.00308   | 0.125  | 0.28575  | 1 | PID_PI3KCI_AKT_PATHWAY                |

|                                            |     |          |           |        |          |   |                                            |
|--------------------------------------------|-----|----------|-----------|--------|----------|---|--------------------------------------------|
| PID_SYNDECAN_3_PATHWAY                     | 16  | 0.0773   | 0.0023    | 0.181  | 0.33441  | 1 | PID_SYNDECAN_3_PATHWAY                     |
| PID_IL8_CXCR1_PATHWAY                      | 28  | 0.149    | 0.00586   | 0.146  | 0.15415  | 1 | PID_IL8_CXCR1_PATHWAY                      |
| PID_MYC_REPRESS_PATHWAY                    | 61  | 0.0527   | 0.00306   | 0.0958 | 0.29108  | 1 | PID_MYC_REPRESS_PATHWAY                    |
| PID_HIF1_TFPATHWAY                         | 65  | 0.135    | 0.00809   | 0.101  | 0.091182 | 1 | PID_HIF1_TFPATHWAY                         |
| PID_TAP63_PATHWAY                          | 54  | 0.0367   | 0.002     | 0.101  | 0.3583   | 1 | PID_TAP63_PATHWAY                          |
| PID_EPHRINB_REV_PATHWAY                    | 29  | 0.241    | 0.00966   | 0.154  | 0.058863 | 1 | PID_EPHRINB_REV_PATHWAY                    |
| PID_BARD1_PATHWAY                          | 29  | 0.0827   | 0.00331   | 0.143  | 0.28165  | 1 | PID_BARD1_PATHWAY                          |
| PID_P53_REGULATION_PATHWAY                 | 56  | -0.0188  | -0.00105  | 0.0972 | 0.5768   | 1 | PID_P53_REGULATION_PATHWAY                 |
| PID_TOLL_ENDOGENOUS_PATHWAY                | 22  | 0.105    | 0.00367   | 0.162  | 0.25778  | 1 | PID_TOLL_ENDOGENOUS_PATHWAY                |
| PID_NCADHERIN_PATHWAY                      | 33  | 0.219    | 0.00937   | 0.132  | 0.04834  | 1 | PID_NCADHERIN_PATHWAY                      |
| PID_ANTHRAX_PATHWAY                        | 17  | 0.0534   | 0.00164   | 0.203  | 0.39654  | 1 | PID_ANTHRAX_PATHWAY                        |
| PID_S1P_S1P2_PATHWAY                       | 23  | 0.168    | 0.00598   | 0.168  | 0.15887  | 1 | PID_S1P_S1P2_PATHWAY                       |
| PID_RAS_PATHWAY                            | 29  | -0.222   | -0.00889  | 0.129  | 0.95697  | 1 | PID_RAS_PATHWAY                            |
| PID_MAPK_TRK_PATHWAY                       | 33  | -0.145   | -0.00619  | 0.125  | 0.87706  | 1 | PID_MAPK_TRK_PATHWAY                       |
| PID_PI3K_PLC_TRK_PATHWAY                   | 36  | -0.0312  | -0.00139  | 0.115  | 0.60702  | 1 | PID_PI3K_PLC_TRK_PATHWAY                   |
| PID_CD8_TCR_DOWNSTREAM_PATHWAY             | 61  | -0.0844  | -0.0049   | 0.107  | 0.78573  | 1 | PID_CD8_TCR_DOWNSTREAM_PATHWAY             |
| PID_EPHA2_FWD_PATHWAY                      | 19  | 0.116    | 0.00375   | 0.172  | 0.2499   | 1 | PID_EPHA2_FWD_PATHWAY                      |
| PID_LYMPH_ANGIOGENESIS_PATHWAY             | 24  | -0.0121  | -0.000442 | 0.149  | 0.53246  | 1 | PID_LYMPH_ANGIOGENESIS_PATHWAY             |
| PID_ALPHA_SYNUCLEIN_PATHWAY                | 32  | -0.0882  | -0.00371  | 0.148  | 0.72386  | 1 | PID_ALPHA_SYNUCLEIN_PATHWAY                |
| PID_FGF_PATHWAY                            | 54  | 0.00392  | 0.000214  | 0.105  | 0.48503  | 1 | PID_FGF_PATHWAY                            |
| PID_INTEGRIN_A4B1_PATHWAY                  | 33  | -0.132   | -0.00562  | 0.131  | 0.84191  | 1 | PID_INTEGRIN_A4B1_PATHWAY                  |
| PID_RAC1_PATHWAY                           | 52  | -0.229   | -0.0123   | 0.112  | 0.97929  | 1 | PID_RAC1_PATHWAY                           |
| PID_RB_1PATHWAY                            | 60  | -0.00588 | -0.000338 | 0.0988 | 0.52372  | 1 | PID_RB_1PATHWAY                            |
| PID_FAK_PATHWAY                            | 57  | -0.0525  | -0.00294  | 0.101  | 0.69896  | 1 | PID_FAK_PATHWAY                            |
| PID_HNF3A_PATHWAY                          | 43  | -0.0635  | -0.00309  | 0.125  | 0.69405  | 1 | PID_HNF3A_PATHWAY                          |
| PID_TGFBR_PATHWAY                          | 54  | -0.107   | -0.00584  | 0.0999 | 0.85787  | 1 | PID_TGFBR_PATHWAY                          |
| PID_HES_HEY_PATHWAY                        | 45  | -0.132   | -0.00659  | 0.121  | 0.86282  | 1 | PID_HES_HEY_PATHWAY                        |
| PID_IL12_STAT4_PATHWAY                     | 32  | 0.0941   | 0.00396   | 0.155  | 0.27201  | 1 | PID_IL12_STAT4_PATHWAY                     |
| REACTOME_GLYCOGEN_BREAKDOWN_GLYCOGENOLYSIS | 13  | 0.0184   | 0.000494  | 0.209  | 0.46485  | 1 | REACTOME_GLYCOGEN_BREAKDOWN_GLYCOGENOLYSIS |
| REACTOME_TRANSLATION                       | 135 | 0.0432   | 0.00372   | 0.059  | 0.2319   | 1 | REACTOME_TRANSLATION                       |
| REACTOME_PYRIMIDINE_CATABOLISM             | 12  | 0.00114  | 2.94E-05  | 0.246  | 0.49815  | 1 | REACTOME_PYRIMIDINE_CATABOLISM             |

|                           |     |         |           |        |          |   |                                                                                                                                  |
|---------------------------|-----|---------|-----------|--------|----------|---|----------------------------------------------------------------------------------------------------------------------------------|
| REACTOME_RNA_POL_III_T... | 23  | -0.103  | -0.00368  | 0.141  | 0.76814  | 1 | REACTOME_RNA_POL_III_TRANSCRIPTION_INITIATION_F<br>ROM_TYPE_2_PROMOTER                                                           |
| REACTOME_PYRUVATE_META... | 37  | 0.022   | 0.000996  | 0.122  | 0.42833  | 1 | REACTOME_PYRUVATE_METABOLISM_AND_CITRIC_ACID<br>_TCA_CYCLE                                                                       |
| REACTOME_EXTRINSIC_PAT... | 13  | 0.178   | 0.00478   | 0.225  | 0.21404  | 1 | REACTOME_EXTRINSIC_PATHWAY_FOR_APOPTOSIS                                                                                         |
| REACTOME_PTM_GAMMA_CAR... | 21  | -0.0608 | -0.00207  | 0.141  | 0.66633  | 1 | REACTOME_PTM_GAMMA_CARBOXYLATION_HYPUSINE_<br>FORMATION_AND_ARYLSULFATASE_ACTIVATION                                             |
| REACTOME_APOPTOTIC_CLE... | 34  | -0.307  | -0.0133   | 0.131  | 0.9905   | 1 | REACTOME_APOPTOTIC_CLEAVAGE_OF_CELLULAR_PROT<br>EINS                                                                             |
| REACTOME_RNA_POL_I_TRA... | 19  | -0.377  | -0.0122   | 0.155  | 0.99244  | 1 | REACTOME_RNA_POL_I_TRANSCRIPTION_TERMINATION<br>REACTOME_FORMATION_OF_THE_TERNARY_COMPLEX_<br>AND_SUBSEQUENTLY_THE_43S_COMPLEX   |
| REACTOME_FORMATION_OF_... | 43  | 0.137   | 0.00669   | 0.101  | 0.087098 | 1 | REACTOME_ACTIVATION_OF_THE_PRE_REPLICATIVE_CO<br>MPLEX                                                                           |
| REACTOME_ACTIVATION_OF... | 27  | -0.035  | -0.00135  | 0.128  | 0.60772  | 1 |                                                                                                                                  |
| REACTOME_PROCESSING_OF... | 13  | 0.0357  | 0.000957  | 0.16   | 0.41193  | 1 | REACTOME_PROCESSING_OF_INTRONLESS_PRE_MRNAS                                                                                      |
| REACTOME_GAP_JUNCTION_... | 10  | 0.0586  | 0.00138   | 0.239  | 0.40324  | 1 | REACTOME_GAP_JUNCTION_DEGRADATION                                                                                                |
| REACTOME_BASE_EXCISION... | 19  | -0.049  | -0.00159  | 0.158  | 0.62145  | 1 | REACTOME_BASE_EXCISION_REPAIR                                                                                                    |
| REACTOME_BILE_ACID_AND... | 27  | -0.297  | -0.0115   | 0.138  | 0.98442  | 1 | REACTOME_BILE_ACID_AND_BILE_SALT_METABOLISM<br>REACTOME_SYNTHESIS_OF_BILE_ACIDS_AND_BILE_SALTS<br>_VIA_7ALPHA_HYDROXYCHOLESTEROL |
| REACTOME_SYNTHESIS_OF_... | 15  | -0.0892 | -0.00257  | 0.179  | 0.69074  | 1 |                                                                                                                                  |
| REACTOME_RECYCLING_OF_... | 11  | -0.498  | -0.0123   | 0.198  | 0.99399  | 1 | REACTOME_RECYCLING_OF_BILE_ACIDS_AND_SALTS                                                                                       |
| REACTOME_SIGNALING_BY_... | 100 | -0.0389 | -0.00288  | 0.0796 | 0.68727  | 1 | REACTOME_SIGNALING_BY_RHO_GTPASES                                                                                                |
| REACTOME_SIGNALING_BY_WNT | 61  | 0.0254  | 0.00147   | 0.0942 | 0.39393  | 1 | REACTOME_SIGNALING_BY_WNT                                                                                                        |
| REACTOME_METABOLISM_OF... | 46  | -0.0165 | -0.000831 | 0.105  | 0.56262  | 1 | REACTOME_METABOLISM_OF_NON_CODING_RNA<br>REACTOME_SYNTHESIS_OF_BILE_ACIDS_AND_BILE_SALTS<br>_VIA_24_HYDROXYCHOLESTEROL           |
| REACTOME_SYNTHESIS_OF_... | 10  | -0.208  | -0.0049   | 0.235  | 0.81234  | 1 |                                                                                                                                  |
| REACTOME_SYNTHESIS_OF_... | 19  | -0.137  | -0.00445  | 0.167  | 0.79491  | 1 | REACTOME_SYNTHESIS_OF_BILE_ACIDS_AND_BILE_SALTS                                                                                  |

|                           |     |          |           |        |         |   |                                                                                     |
|---------------------------|-----|----------|-----------|--------|---------|---|-------------------------------------------------------------------------------------|
| REACTOME_METABOLISM_OF... | 35  | -0.0287  | -0.00126  | 0.128  | 0.58895 | 1 | REACTOME_METABOLISM_OF_STEROID_HORMONES_AND_VITAMINS_A_AND_D                        |
| REACTOME_ANDROGEN_BIOS... | 10  | -0.156   | -0.00368  | 0.227  | 0.75492 | 1 | REACTOME_ANDROGEN_BIOSYNTHESIS                                                      |
| REACTOME_SIGNALLING_BY... | 201 | 0.0587   | 0.00616   | 0.0544 | 0.14033 | 1 | REACTOME_SIGNALLING_BY_NGF                                                          |
| REACTOME_CTNNB1_PHOSPH... | 15  | -0.144   | -0.00414  | 0.188  | 0.77791 | 1 | REACTOME_CTNNB1_PHOSPHORYLATION_CASCADE                                             |
| REACTOME_INSULIN_RECEP... | 22  | 0.041    | 0.00143   | 0.168  | 0.40373 | 1 | REACTOME_INSULIN_RECEPTOR_RECYCLING                                                 |
| REACTOME_COPI_MEDIATED... | 10  | -0.00984 | -0.000231 | 0.202  | 0.51938 | 1 | REACTOME_COPI_MEDIATED_TRANSPORT                                                    |
| REACTOME_NEF_MEDIATED_... | 8   | -0.43    | -0.00905  | 0.253  | 0.95527 | 1 | REACTOME_NEF_MEDIATED_DOWNREGULATION_OF_MHC_CLASS_I_COMPLEX_CELL_SURFACE_EXPRESSION |
| REACTOME_SIGNALING_BY_... | 74  | 0.0314   | 0.00201   | 0.0895 | 0.36283 | 1 | REACTOME_SIGNALING_BY_SCF_KIT                                                       |
| REACTOME_DEVELOPMENTAL... | 366 | -0.013   | -0.00183  | 0.0404 | 0.62624 | 1 | REACTOME_DEVELOPMENTAL_BIOLOGY                                                      |
| REACTOME_CROSS_PRESENT... | 44  | 0.0561   | 0.00277   | 0.112  | 0.30815 | 1 | REACTOME_CROSS_PRESENTATION_OF_SOLUBLE_EXOGENOUS_ANTIGENS_ENDOSOMES                 |
| REACTOME_SIGNALING_BY_... | 17  | -0.0217  | -0.000665 | 0.164  | 0.5526  | 1 | REACTOME_SIGNALING_BY_NODAL                                                         |
| REACTOME_DAG_AND_IP3_S... | 31  | 0.148    | 0.00614   | 0.146  | 0.15534 | 1 | REACTOME_DAG_AND_IP3_SIGNALING                                                      |
| REACTOME_SPRY_REGULATI... | 13  | -0.112   | -0.003    | 0.217  | 0.69694 | 1 | REACTOME_SPRY_REGULATION_OF_FGF_SIGNALING                                           |
| REACTOME_TCA_CYCLE_AND... | 111 | 0.0035   | 0.000273  | 0.0661 | 0.47891 | 1 | REACTOME_TCA_CYCLE_AND_RESPIRATORY_ELECTRON_TRANSPORT                               |
| REACTOME_BMAL1_CLOCK_N... | 35  | -0.107   | -0.0047   | 0.13   | 0.79397 | 1 | REACTOME_BMAL1_CLOCK_NPAS2_ACTIVATES_CIRCADIAN_EXPRESSION                           |
| REACTOME_ANTIGEN_PROCE... | 68  | 0.0854   | 0.00523   | 0.0953 | 0.18517 | 1 | REACTOME_ANTIGEN_PROCESSING_CROSS_PRESENTATION                                      |
| REACTOME_GROWTH_HORMON... | 23  | -0.178   | -0.00635  | 0.172  | 0.84936 | 1 | REACTOME_GROWTH_HORMONE_RECEPTOR_SIGNALING                                          |
| REACTOME_TRIF_MEDIATED... | 67  | 0.0443   | 0.00269   | 0.091  | 0.31334 | 1 | REACTOME_TRIF_MEDIATED_TLR3_SIGNALING                                               |
| REACTOME_CELL_CELL_COM... | 115 | -0.108   | -0.00863  | 0.0757 | 0.92408 | 1 | REACTOME_CELL_CELL_COMMUNICATION                                                    |
| REACTOME_ABCA_TRANSPOR... | 16  | -0.298   | -0.00886  | 0.176  | 0.95524 | 1 | REACTOME_ABCA_TRANSPORTERS_IN_LIPID_HOMEOSTASIS                                     |
| REACTOME_ENDOSOMAL_VAC... | 8   | 0.0313   | 0.000659  | 0.369  | 0.46619 | 1 | REACTOME_ENDOSOMAL_VACUOLAR_PATHWAY                                                 |





|                           |     |         |           |        |          |   |                                                                          |
|---------------------------|-----|---------|-----------|--------|----------|---|--------------------------------------------------------------------------|
| REACTOME_CELL_CYCLE       | 373 | 0.0477  | 0.00678   | 0.0392 | 0.11207  | 1 | REACTOME_CELL_CYCLE                                                      |
| REACTOME_SIGNALING_BY_... | 85  | 0.0959  | 0.00656   | 0.0795 | 0.11399  | 1 | REACTOME_SIGNALING_BY_ERBB4                                              |
| REACTOME_ORC1_REMOVAL_... | 64  | 0.0993  | 0.0059    | 0.0908 | 0.13715  | 1 | REACTOME_ORC1_REMOVAL_FROM_CHROMATIN                                     |
| REACTOME_O_LINKED_GLYC... | 52  | -0.14   | -0.00752  | 0.109  | 0.90169  | 1 | REACTOME_O_LINKED_GLYCOSYLATION_OF_MUCINS                                |
| REACTOME_SULFUR_AMINO_... | 24  | -0.0109 | -0.000396 | 0.14   | 0.53097  | 1 | REACTOME_SULFUR_AMINO_ACID_METABOLISM                                    |
| REACTOME_DOWNREGULATIO... | 11  | 0.294   | 0.00725   | 0.216  | 0.086926 | 1 | REACTOME_DOWNREGULATION_OF_ERBB2_ERBB3_SIGN<br>ALING                     |
| REACTOME_ANTIVIRAL_MEC... | 65  | -0.0168 | -0.00101  | 0.0891 | 0.57496  | 1 | REACTOME_ANTIVIRAL_MECHANISM_BY_IFN_STIMULAT<br>ED_GENES                 |
| REACTOME_PROLACTIN_REC... | 13  | -0.225  | -0.00603  | 0.232  | 0.83428  | 1 | REACTOME_PROLACTIN_RECEPTOR_SIGNALING                                    |
| REACTOME_SIGNALING_BY_... | 96  | 0.0683  | 0.00497   | 0.0775 | 0.18909  | 1 | REACTOME_SIGNALING_BY_ERBB2                                              |
| REACTOME_SPHINGOLIPID_... | 30  | -0.046  | -0.00187  | 0.157  | 0.61482  | 1 | REACTOME_SPHINGOLIPID_DE_NOVO_BIOSYNTHESIS                               |
| REACTOME_TERMINATION_O... | 21  | -0.0939 | -0.0032   | 0.171  | 0.70816  | 1 | REACTOME_TERMINATION_OF_O_GLYCAN_BIOSYNTHESI<br>S                        |
| REACTOME_DEFENSINS        | 35  | -0.103  | -0.00451  | 0.172  | 0.72463  | 1 | REACTOME_DEFENSINS                                                       |
| REACTOME_SIGNALING_BY_... | 17  | 0.0101  | 0.00031   | 0.153  | 0.47362  | 1 | REACTOME_SIGNALING_BY_CONSTITUTIVELY_ACTIVE_EG<br>FR                     |
| REACTOME_GRB2_EVENTS_I... | 22  | -0.166  | -0.00581  | 0.165  | 0.8438   | 1 | REACTOME_GRB2_EVENTS_IN_ERBB2_SIGNALING                                  |
| REACTOME_SIGNALING_BY_... | 103 | 0.111   | 0.00838   | 0.074  | 0.066414 | 1 | REACTOME_SIGNALING_BY_EGFR_IN_CANCER                                     |
| REACTOME_MEMBRANE_BIND... | 9   | 0.178   | 0.00396   | 0.241  | 0.23058  | 1 | REACTOME_MEMBRANE_BINDING_AND_TARGETTING_O<br>F_GAG_PROTEINS             |
| REACTOME_BETA_DEFENSINS   | 27  | -0.179  | -0.0069   | 0.195  | 0.82006  | 1 | REACTOME_BETA_DEFENSINS                                                  |
| REACTOME_SRP_DEPENDENT... | 101 | 0.064   | 0.00477   | 0.0699 | 0.17981  | 1 | REACTOME_SRP_DEPENDENT_COTRANSLATIONAL_PROT<br>EIN_TARGETING_TO_MEMBRANE |
| REACTOME_PI3K_EVENTS_I... | 35  | 0.225   | 0.0099    | 0.126  | 0.036886 | 1 | REACTOME_PI3K_EVENTS_IN_ERBB4_SIGNALING                                  |
| REACTOME_SHC1_EVENTS_I... | 20  | -0.116  | -0.00387  | 0.163  | 0.76299  | 1 | REACTOME_SHC1_EVENTS_IN_ERBB4_SIGNALING                                  |
| REACTOME_PI3K_EVENTS_I... | 41  | 0.135   | 0.00644   | 0.117  | 0.12393  | 1 | REACTOME_PI3K_EVENTS_IN_ERBB2_SIGNALING                                  |
| REACTOME_NUCLEAR_SIGNA... | 37  | 0.128   | 0.00577   | 0.134  | 0.1698   | 1 | REACTOME_NUCLEAR_SIGNALING_BY_ERBB4                                      |
| REACTOME_GLYCOPHINGOL...  | 32  | -0.0164 | -0.000691 | 0.134  | 0.54892  | 1 | REACTOME_GLYCOPHINGOLIPID_METABOLISM                                     |
| REACTOME_PPARA_ACTIVAT... | 101 | 0.0719  | 0.00536   | 0.0729 | 0.162    | 1 | REACTOME_PPARA_ACTIVATES_GENE_EXPRESSION                                 |

|                           |     |         |           |        |          |   |                                                                                       |
|---------------------------|-----|---------|-----------|--------|----------|---|---------------------------------------------------------------------------------------|
| REACTOME_ASSOCIATION_O... | 13  | 0.0482  | 0.00129   | 0.205  | 0.40729  | 1 | REACTOME_ASSOCIATION_OF_LICENSEING_FACTORS_WITH_THE_PRE_REPLICATIVE_COMPLEX           |
| REACTOME_RIP_MEDIATED_... | 17  | 0.172   | 0.00527   | 0.181  | 0.17116  | 1 | REACTOME_RIP_MEDIATED_NFKB_ACTIVATION_VIA_DAI                                         |
| REACTOME_PRE_NOTCH_TRA... | 26  | -0.0978 | -0.00371  | 0.149  | 0.74486  | 1 | REACTOME_PRE_NOTCH_TRANSCRIPTION_AND_TRANSLATION                                      |
| REACTOME_DEGRADATION_O... | 27  | 0.226   | 0.00874   | 0.162  | 0.081726 | 1 | REACTOME_DEGRADATION_OF_THE_EXTRACELLULAR_MATRIX                                      |
| REACTOME_MITOCHONDRIAL... | 45  | 0.0636  | 0.00317   | 0.104  | 0.26975  | 1 | REACTOME_MITOCHONDRIAL_PROTEIN_IMPORT                                                 |
| REACTOME_SIGNALING_BY_... | 19  | -0.249  | -0.00806  | 0.189  | 0.90564  | 1 | REACTOME_SIGNALING_BY_HIPPO                                                           |
| REACTOME_ACTIVATED_NOT... | 26  | 0.172   | 0.00651   | 0.14   | 0.10966  | 1 | REACTOME_ACTIVATED_NOTCH1_TRANSMITS_SIGNAL_TO_THE_NUCLEUS                             |
| REACTOME_TRAFFICKING_A... | 10  | 0.107   | 0.00252   | 0.208  | 0.30339  | 1 | REACTOME_TRAFFICKING_AND_PROCESSING_OF_ENDOSOMAL_TLR                                  |
| REACTOME_SIGNALING_BY_... | 12  | 0.0464  | 0.0012    | 0.2    | 0.40814  | 1 | REACTOME_SIGNALING_BY_NOTCH4                                                          |
| REACTOME_DOWNSTREAM_SI... | 89  | 0.102   | 0.00715   | 0.0767 | 0.0915   | 1 | REACTOME_DOWNSTREAM_SIGNALING_EVENTS_OF_B_CELL_RECEPTOR_BCR                           |
| REACTOME_ACTIVATION_OF... | 59  | 0.15    | 0.00856   | 0.0958 | 0.058617 | 1 | REACTOME_ACTIVATION_OF_NF_KAPPAB_IN_B_CELLS                                           |
| REACTOME_RORA_ACTIVATE... | 23  | -0.0169 | -0.000604 | 0.158  | 0.54269  | 1 | REACTOME_RORA_ACTIVATES_CIRCADIAN_EXPRESSION                                          |
| REACTOME_ANTIGEN_ACTIV... | 27  | 0.158   | 0.0061    | 0.139  | 0.12782  | 1 | REACTOME_ANTIGEN_ACTIVATES_B_CELL_RECEPTOR_LEADING_TO_GENERATION_OF_SECOND_MESSENGERS |
| REACTOME_REGULATION_OF... | 13  | -0.295  | -0.00792  | 0.221  | 0.90916  | 1 | REACTOME_REGULATION_OF_COMPLEMENT_CASCADE                                             |
| REACTOME_YAP1_AND_WWTR... | 23  | 0.176   | 0.00627   | 0.176  | 0.15822  | 1 | REACTOME_YAP1_AND_WWTR1_TAZ_STIMULATED_GENE_EXPRESSION                                |
| REACTOME_SIGNALING_BY_... | 12  | -0.0212 | -0.000546 | 0.197  | 0.54281  | 1 | REACTOME_SIGNALING_BY_NOTCH2                                                          |
| REACTOME_PRE_NOTCH_EXP... | 41  | -0.109  | -0.00517  | 0.12   | 0.81643  | 1 | REACTOME_PRE_NOTCH_EXPRESSION_AND_PROCESSING                                          |
| REACTOME_SIGNALING_BY_... | 116 | 0.115   | 0.00922   | 0.0672 | 0.043028 | 1 | REACTOME_SIGNALING_BY_THE_B_CELL_RECEPTOR_BCR                                         |

|                            |     |          |           |        |          |   |                                                                                      |
|----------------------------|-----|----------|-----------|--------|----------|---|--------------------------------------------------------------------------------------|
| REACTOME_EXTRACELLULAR...  | 83  | 0.16     | 0.0108    | 0.0922 | 0.041782 | 1 | REACTOME_EXTRACELLULAR_MATRIX_ORGANIZATION                                           |
| REACTOME_NOTCH1_INTRAC...  | 40  | -0.0285  | -0.00134  | 0.132  | 0.58539  | 1 | REACTOME_NOTCH1_INTRACELLULAR_DOMAIN_REGULA<br>TES_TRANSCRIPTION                     |
| REACTOME_CIRCADIANT_REP... | 22  | -0.0736  | -0.00257  | 0.17   | 0.66771  | 1 | REACTOME_CIRCADIANT_REPRESSION_OF_EXPRESSION_B<br>Y_REV_ERBA                         |
| REACTOME_PRE_NOTCH_PRO...  | 16  | -0.144   | -0.00427  | 0.186  | 0.78069  | 1 | REACTOME_PRE_NOTCH_PROCESSING_IN_GOLGI                                               |
| REACTOME_SIGNALING_BY_...  | 64  | 0.038    | 0.00226   | 0.0978 | 0.34892  | 1 | REACTOME_SIGNALING_BY_NOTCH1                                                         |
| REACTOME_SIGNALING_BY_...  | 12  | -0.0339  | -0.000874 | 0.204  | 0.56593  | 1 | REACTOME_SIGNALING_BY_NOTCH3                                                         |
| REACTOME_TRIGLYCERIDE_...  | 36  | -0.00503 | -0.000224 | 0.131  | 0.51534  | 1 | REACTOME_TRIGLYCERIDE_BIOSYNTHESIS                                                   |
| REACTOME_INSULIN_RECEP...  | 84  | -0.12    | -0.00817  | 0.0815 | 0.92962  | 1 | REACTOME_INSULIN_RECEPTOR_SIGNALLING_CASCADE                                         |
| REACTOME_ARMS_MEDIATED...  | 17  | -0.367   | -0.0113   | 0.18   | 0.9791   | 1 | REACTOME_ARMS_MEDIATED_ACTIVATION                                                    |
| REACTOME_PROLONGED_ERK...  | 19  | -0.18    | -0.00583  | 0.161  | 0.86722  | 1 | REACTOME_PROLONGED_ERK_ACTIVATION_EVENTS                                             |
| REACTOME_SIGNALLING_TO...  | 27  | -0.199   | -0.00771  | 0.135  | 0.92957  | 1 | REACTOME_SIGNALLING_TO_RAS                                                           |
| REACTOME_SIGNALING_BY_BMP  | 21  | 0.136    | 0.00463   | 0.168  | 0.20902  | 1 | REACTOME_SIGNALING_BY_BMP                                                            |
| REACTOME_CELL_SURFACE_...  | 83  | -0.212   | -0.0144   | 0.0811 | 0.99556  | 1 | REACTOME_CELL_SURFACE_INTERACTIONS_AT_THE_VAS<br>CULAR_WALL                          |
| REACTOME_NGF_SIGNALLIN...  | 131 | 0.011    | 0.000929  | 0.0658 | 0.43391  | 1 | REACTOME_NGF_SIGNALLING_VIA_TRKA_FROM_THE_PL<br>ASMA_MEMBRANE                        |
| REACTOME_SIGNALLING_TO...  | 36  | -0.0672  | -0.003    | 0.116  | 0.71966  | 1 | REACTOME_SIGNALLING_TO_ERKS                                                          |
| REACTOME_P38MAPK_EVENTS    | 13  | -0.286   | -0.00768  | 0.192  | 0.93239  | 1 | REACTOME_P38MAPK_EVENTS                                                              |
| REACTOME_ACYL_CHAIN_RE...  | 15  | 0.00827  | 0.000238  | 0.187  | 0.48239  | 1 | REACTOME_ACYL_CHAIN_REMODELLING_OF_PI                                                |
| REACTOME_TGF_BETA_RECE...  | 14  | 0.0596   | 0.00166   | 0.217  | 0.39181  | 1 | REACTOME_TGF_BETA_RECEPTOR_SIGNALING_IN_EMT_<br>EPITHELIAL_TO_MESENCHYMAL_TRANSITION |
| REACTOME_DOWNREGULATIO...  | 21  | -0.308   | -0.0105   | 0.164  | 0.96964  | 1 | REACTOME_DOWNREGULATION_OF_TGF_BETA_RECEPT<br>OR_SIGNALING                           |
| REACTOME_COLLAGEN_FORM...  | 56  | 0.128    | 0.00709   | 0.112  | 0.12721  | 1 | REACTOME_COLLAGEN_FORMATION                                                          |
| REACTOME_SMAD2_SMAD3_S...  | 25  | 0.0152   | 0.000566  | 0.149  | 0.45942  | 1 | REACTOME_SMAD2_SMAD3_SMAD4_HETEROTRIMER_RE<br>GULATES_TRANSCRIPTION                  |
| REACTOME_SIGNALING_BY_...  | 121 | 0.00542  | 0.000442  | 0.07   | 0.46915  | 1 | REACTOME_SIGNALING_BY_FGFR_IN_DISEASE                                                |
| REACTOME_HS_GAG_DEGRAD...  | 17  | 0.0292   | 0.000896  | 0.182  | 0.4361   | 1 | REACTOME_HS_GAG_DEGRADATION                                                          |

|                           |     |           |           |        |          |   |                                                                                       |
|---------------------------|-----|-----------|-----------|--------|----------|---|---------------------------------------------------------------------------------------|
| REACTOME_SIGNALLING_TO... | 15  | -0.263    | -0.00757  | 0.18   | 0.92829  | 1 | REACTOME_SIGNALLING_TO_P38_VIA_RIT_AND_RIN                                            |
| REACTOME_P53_INDEPENDE... | 47  | 0.1       | 0.00511   | 0.107  | 0.17362  | 1 | REACTOME_P53_INDEPENDENT_G1_S_DNA_DAMAGE_C<br>HECKPOINT                               |
| REACTOME_REGULATION_OF... | 23  | 0.203     | 0.00725   | 0.154  | 0.093781 | 1 | REACTOME_REGULATION_OF_HYPOXIA_INDUCIBLE_FACT<br>OR_HIF_BY_OXYGEN                     |
| REACTOME_ACYL_CHAIN_RE... | 22  | -0.000773 | -2.69E-05 | 0.15   | 0.50205  | 1 | REACTOME_ACYL_CHAIN_REMODELLING_OF_PC<br>REACTOME_SYNTHESIS_OF_PIPS_AT_THE_GOLGI_MEMB |
| REACTOME_SYNTHESIS_OF_... | 16  | 0.213     | 0.00633   | 0.223  | 0.16949  | 1 | RANE                                                                                  |
| REACTOME_TGF_BETA_RECE... | 24  | -0.305    | -0.0111   | 0.156  | 0.97455  | 1 | REACTOME_TGF_BETA_RECEPTOR_SIGNALING_ACTIVATE<br>S_SMADS                              |
| REACTOME_ACTIVATED_POI... | 16  | -0.189    | -0.00563  | 0.204  | 0.8237   | 1 | REACTOME_ACTIVATED_POINT_MUTANTS_OF_FGFR2                                             |
| REACTOME_PHOSPHOLIPID_... | 185 | 0.0241    | 0.00243   | 0.0568 | 0.33553  | 1 | REACTOME_PHOSPHOLIPID_METABOLISM                                                      |
| REACTOME_CS_DS_DEGRADA... | 10  | -0.224    | -0.00526  | 0.216  | 0.84969  | 1 | REACTOME_CS_DS_DEGRADATION                                                            |
| REACTOME_SYNTHESIS_OF_PA  | 27  | 0.00224   | 8.67E-05  | 0.149  | 0.494    | 1 | REACTOME_SYNTHESIS_OF_PA                                                              |
| REACTOME_OXYGEN_DEPEND... | 16  | 0.273     | 0.00813   | 0.198  | 0.083982 | 1 | REACTOME_OXYGEN_DEPENDENT_PROLINE_HYDROXYLA<br>TION_OF_HYPOXIA_INDUCIBLE_FACTOR_ALPHA |
| REACTOME_SYNTHESIS_OF_... | 9   | 0.179     | 0.00399   | 0.28   | 0.26141  | 1 | REACTOME_SYNTHESIS_OF_PIPS_AT_THE_LATE_ENDOSO<br>ME_MEMBRANE                          |
| REACTOME_SYNTHESIS_OF_PE  | 11  | -0.286    | -0.00706  | 0.233  | 0.89039  | 1 | REACTOME_SYNTHESIS_OF_PE                                                              |
| REACTOME_GASTRIN_CREB_... | 191 | 0.0727    | 0.00744   | 0.0586 | 0.10725  | 1 | REACTOME_GASTRIN_CREB_SIGNALLING_PATHWAY_VIA<br>_PKC_AND_MAPK                         |
| REACTOME_CHONDROITIN_S... | 17  | -0.169    | -0.00519  | 0.184  | 0.82104  | 1 | REACTOME_CHONDROITIN_SULFATE_BIOSYNTHESIS                                             |
| REACTOME_HYALURONAN_UP... | 10  | -0.0811   | -0.00191  | 0.209  | 0.65082  | 1 | REACTOME_HYALURONAN_UPTAKE_AND_DEGRADATION                                            |
| REACTOME_SIGNALING_BY_... | 29  | -0.0306   | -0.00122  | 0.142  | 0.58509  | 1 | REACTOME_SIGNALING_BY_FGFR1_MUTANTS                                                   |
| REACTOME_SYNTHESIS_OF_... | 28  | 0.0902    | 0.00355   | 0.152  | 0.27587  | 1 | REACTOME_SYNTHESIS_OF_PIPS_AT_THE_PLASMA_MEM<br>BRANE                                 |
| REACTOME_THE_ACTIVATIO... | 8   | -0.423    | -0.0089   | 0.284  | 0.93167  | 1 | REACTOME_THE_ACTIVATION_OF_ARYLSULFATASES                                             |

|                           |     |          |           |       |          |   |                                                                               |
|---------------------------|-----|----------|-----------|-------|----------|---|-------------------------------------------------------------------------------|
| REACTOME_TRANSCRIPTION... | 35  | 0.0482   | 0.00212   | 0.129 | 0.35478  | 1 | REACTOME_TRANSCRIPTIONAL_ACTIVITY_OF_SMAD2_S<br>MAD3_SMAD4_HETEROTRIMER       |
| REACTOME_HYALURONAN_ME... | 14  | -0.0571  | -0.00159  | 0.183 | 0.62246  | 1 | REACTOME_HYALURONAN_METABOLISM                                                |
| REACTOME_DOWNREGULATIO... | 18  | -0.0258  | -0.000813 | 0.197 | 0.55203  | 1 | REACTOME_DOWNREGULATION_OF_SMAD2_3_SMAD4_<br>TRANSCRIPTIONAL_ACTIVITY         |
| REACTOME_KERATAN_SULFA... | 26  | -0.178   | -0.00675  | 0.141 | 0.89638  | 1 | REACTOME_KERATAN_SULFATE_BIOSYNTHESIS                                         |
| REACTOME_REVERSIBLE_HY... | 11  | 0.00791  | 0.000195  | 0.246 | 0.48715  | 1 | REACTOME_REVERSIBLE_HYDRATION_OF_CARBON_DIOXI<br>DE                           |
| REACTOME_SIGNALING_BY_... | 18  | 0.0738   | 0.00233   | 0.184 | 0.34418  | 1 | REACTOME_SIGNALING_BY_FGFR1_FUSION_MUTANTS                                    |
| REACTOME_ALPHA_LINOLEN... | 10  | -0.113   | -0.00267  | 0.221 | 0.69631  | 1 | REACTOME_ALPHA_LINOLENIC_ACID_ALA_METABOLISM                                  |
| REACTOME_SIGNALING_BY_... | 11  | -0.186   | -0.0046   | 0.225 | 0.79654  | 1 | REACTOME_SIGNALING_BY_ACTIVATED_POINT_MUTANT<br>S_OF_FGFR1                    |
| REACTOME_PI_METABOLISM    | 44  | 0.0639   | 0.00315   | 0.124 | 0.30316  | 1 | REACTOME_PI_METABOLISM                                                        |
| REACTOME_ABACAVIR_TRAN... | 10  | 0.145    | 0.0034    | 0.268 | 0.29432  | 1 | REACTOME_ABACAVIR_TRANSPORT_AND_METABOLISM                                    |
| REACTOME_CHONDROITIN_S... | 42  | -0.07    | -0.00337  | 0.111 | 0.73553  | 1 | REACTOME_CHONDROITIN_SULFATE_DERMATAN_SULFA<br>TE_METABOLISM                  |
| REACTOME_LATENT_INFECT... | 28  | 0.0938   | 0.00369   | 0.15  | 0.26567  | 1 | REACTOME_LATENT_INFECTION_OF_HOMO_SAPIENS_WI<br>TH_MYCOBACTERIUM_TUBERCULOSIS |
| REACTOME_SYNTHESIS_OF_PC  | 17  | 0.0241   | 0.00074   | 0.158 | 0.43925  | 1 | REACTOME_SYNTHESIS_OF_PC                                                      |
| REACTOME_HS_GAG_BIOSYN... | 27  | 0.226    | 0.00874   | 0.167 | 0.088125 | 1 | REACTOME_HS_GAG_BIOSYNTHESIS                                                  |
| REACTOME_SIGNALING_BY_... | 11  | -0.232   | -0.00571  | 0.233 | 0.83938  | 1 | REACTOME_SIGNALING_BY_FGFR3_MUTANTS                                           |
| REACTOME_KERATAN_SULFA... | 30  | -0.133   | -0.00542  | 0.132 | 0.84422  | 1 | REACTOME_KERATAN_SULFATE_KERATIN_METABOLISM                                   |
| REACTOME_APOPTOSIS_IND... | 13  | -0.193   | -0.00517  | 0.192 | 0.8425   | 1 | REACTOME_APOPTOSIS_INDUCED_DNA_FRAGMENTATIO<br>N                              |
| REACTOME_KERATAN_SULFA... | 11  | -0.0809  | -0.002    | 0.226 | 0.64002  | 1 | REACTOME_KERATAN_SULFATE_DEGRADATION                                          |
| REACTOME_HEPARAN_SULFA... | 46  | -0.00398 | -0.000201 | 0.121 | 0.51318  | 1 | REACTOME_HEPARAN_SULFATE_HEPARIN_HS_GAG_MET<br>ABOLISM                        |
| REACTOME_GLYCOSAMINOGL... | 102 | -0.0833  | -0.00624  | 0.075 | 0.8667   | 1 | REACTOME_GLYCOSAMINOGLYCAN_METABOLISM                                         |
| REACTOME_ACYL_CHAIN_RE... | 16  | 0.152    | 0.00453   | 0.174 | 0.19125  | 1 | REACTOME_ACYL_CHAIN_REMODELLING_OF_PG                                         |

|                           |     |          |           |        |          |   |                                                                              |
|---------------------------|-----|----------|-----------|--------|----------|---|------------------------------------------------------------------------------|
| REACTOME_ACYL_CHAIN_RE... | 21  | -0.0371  | -0.00126  | 0.153  | 0.59565  | 1 | REACTOME_ACYL_CHAIN_REMODELLING_OF_PE                                        |
| REACTOME_ACYL_CHAIN_RE... | 15  | 0.132    | 0.00379   | 0.176  | 0.22683  | 1 | REACTOME_ACYL_CHAIN_REMODELLING_OF_PS                                        |
| REACTOME_SIGNALING_BY_... | 43  | -0.13    | -0.00635  | 0.116  | 0.86872  | 1 | REACTOME_SIGNALING_BY_FGFR_MUTANTS                                           |
| REACTOME_MHC_CLASS_II_... | 86  | 0.0427   | 0.00294   | 0.0793 | 0.29523  | 1 | REACTOME_MHC_CLASS_II_ANTIGEN_PRESENTATION                                   |
| REACTOME_GLYCEROPHOSPH... | 80  | 0.0323   | 0.00214   | 0.0807 | 0.34456  | 1 | REACTOME_GLYCEROPHOSPHOLIPID_BIOSYNTHESIS                                    |
| REACTOME_A_TETRASACCHA... | 22  | 0.0522   | 0.00182   | 0.165  | 0.376    | 1 | REACTOME_A_TETRASACCHARIDE_LINKER_SEQUENCE_IS<br>_REQUIRED_FOR_GAG_SYNTHESIS |
| REACTOME_CDK_MEDIATED_... | 45  | 0.125    | 0.00624   | 0.106  | 0.1194   | 1 | REACTOME_CDK_MEDIATED_PHOSPHORYLATION_AND_R<br>EMOVAL_OF_CDC6                |
| REACTOME_PLATELET_ADHE... | 11  | -0.153   | -0.00377  | 0.242  | 0.73644  | 1 | REACTOME_PLATELET_ADHESION_TO_EXPOSED_COLLAG<br>EN                           |
| REACTOME_VEGF_LIGAND_R... | 9   | 0.313    | 0.00698   | 0.296  | 0.1456   | 1 | REACTOME_VEGF_LIGAND_RECEPTOR_INTERACTIONS                                   |
| REACTOME_ENOS_ACTIVATI... | 19  | -0.207   | -0.00672  | 0.162  | 0.89929  | 1 | REACTOME_ENOS_ACTIVATION_AND_REGULATION                                      |
| REACTOME_MICRORNA_MIRN... | 22  | -0.0881  | -0.00307  | 0.152  | 0.71938  | 1 | REACTOME_MICRORNA_MIRNA_BIOGENESIS                                           |
| REACTOME_NUCLEAR_EVENT... | 22  | -0.113   | -0.00393  | 0.159  | 0.76148  | 1 | REACTOME_NUCLEAR_EVENTS_KINASE_AND_TRANSCRIP<br>TION_FACTOR_ACTIVATION       |
| REACTOME_RETROGRADE_NE... | 13  | -0.0158  | -0.000425 | 0.211  | 0.52999  | 1 | REACTOME_RETROGRADE_NEUROTROPHIN_SIGNALLING                                  |
| REACTOME_ERKS_ARE_INAC... | 12  | -0.387   | -0.00998  | 0.21   | 0.96762  | 1 | REACTOME_ERKS_ARE_INACTIVATED                                                |
| REACTOME_NEGATIVE_REGU... | 7   | -0.00901 | -0.000177 | 0.294  | 0.51222  | 1 | REACTOME_NEGATIVE_REGULATION_OF_THE_PI3K_AKT_<br>NETWORK                     |
| REACTOME_PI3K_AKT_ACTI... | 35  | 0.115    | 0.00506   | 0.123  | 0.17536  | 1 | REACTOME_PI3K_AKT_ACTIVATION                                                 |
| REACTOME_REGULATORY_RN... | 25  | -0.117   | -0.00433  | 0.146  | 0.7878   | 1 | REACTOME_REGULATORY_RNA_PATHWAYS                                             |
| REACTOME_EGFR_DOWNREGU... | 23  | 0.265    | 0.00943   | 0.165  | 0.054401 | 1 | REACTOME_EGFR_DOWNREGULATION                                                 |
| REACTOME_PROCESSING_OF... | 129 | 0.0403   | 0.00339   | 0.0641 | 0.26458  | 1 | REACTOME_PROCESSING_OF_CAPPED_INTRON_CONTAIN<br>ING_PRE_MRNA                 |
| REACTOME_PECAM1_INTERA... | 10  | 0.081    | 0.00191   | 0.232  | 0.36327  | 1 | REACTOME_PECAM1_INTERACTIONS                                                 |
| REACTOME_REGULATION_OF... | 10  | -0.0965  | -0.00227  | 0.234  | 0.66014  | 1 | REACTOME_REGULATION_OF_PYRUVATE_DEHYDROGEN<br>ASE_PDH_COMPLEX                |
| REACTOME_BASIGIN_INTER... | 23  | -0.186   | -0.00662  | 0.144  | 0.90069  | 1 | REACTOME_BASIGIN_INTERACTIONS                                                |

|                           |     |        |          |        |          |   |                                                                                                                        |
|---------------------------|-----|--------|----------|--------|----------|---|------------------------------------------------------------------------------------------------------------------------|
| REACTOME_AKT_PHOSPHORY... | 12  | 0.222  | 0.00571  | 0.206  | 0.14126  | 1 | REACTOME_AKT_PHOSPHORYLATES_TARGETS_IN_THE_C<br>YTOSOL                                                                 |
| REACTOME_GAB1_SIGNALOSOME | 35  | 0.174  | 0.00765  | 0.122  | 0.076583 | 1 | REACTOME_GAB1_SIGNALOSOME                                                                                              |
| REACTOME_SHC1_EVENTS_I... | 15  | -0.194 | -0.0056  | 0.175  | 0.86698  | 1 | REACTOME_SHC1_EVENTS_IN_EGFR_SIGNALING                                                                                 |
| REACTOME_ACTIVATION_OF... | 51  | 0.0823 | 0.00437  | 0.0929 | 0.18778  | 1 | REACTOME_ACTIVATION_OF_THE_MRNA_UPON_BINDIN<br>G_OF_THE_CAP_BINDING_COMPLEX_AND_EIFS_AND_SU<br>BSEQUENT_BINDING_TO_43S |
| REACTOME_PHOSPHORYLATI... | 13  | 0.216  | 0.00579  | 0.22   | 0.163    | 1 | REACTOME_PHOSPHORYLATION_OF_CD3_AND_TCR_ZET<br>A_CHAINS                                                                |
| REACTOME_GLUTAMATE_NEU... | 15  | 0.0619 | 0.00178  | 0.203  | 0.3801   | 1 | REACTOME_GLUTAMATE_NEUROTRANSMITTER_RELEASE<br>_CYCLE                                                                  |
| REACTOME_TRANSLOCATION... | 11  | 0.159  | 0.00391  | 0.248  | 0.26092  | 1 | REACTOME_TRANSLOCATION_OF_ZAP_70_TO_IMMUNO<br>LOGICAL_SYNAPSE                                                          |
| REACTOME_ERK_MAPK_TARGETS | 19  | -0.22  | -0.00714 | 0.176  | 0.89468  | 1 | REACTOME_ERK_MAPK_TARGETS                                                                                              |
| REACTOME_TIE2_SIGNALING   | 17  | -0.271 | -0.00832 | 0.173  | 0.94122  | 1 | REACTOME_TIE2_SIGNALING                                                                                                |
| REACTOME_GENERATION_OF... | 23  | 0.157  | 0.00561  | 0.16   | 0.16226  | 1 | REACTOME_GENERATION_OF_SECOND_MESSENGER_MO<br>LECULES                                                                  |
| REACTOME_GENERIC_TRANS... | 333 | 0.0743 | 0.00999  | 0.0461 | 0.053795 | 1 | REACTOME_GENERIC_TRANSCRIPTION_PATHWAY                                                                                 |
| REACTOME_RESPONSE_TO_E... | 73  | 0.0959 | 0.00608  | 0.0893 | 0.14148  | 1 | REACTOME_RESPONSE_TO_ELEVATED_PLATELET_CYTOS<br>OLIC_CA2_                                                              |
| REACTOME_TRANSPORT_OF_... | 51  | 0.0488 | 0.00259  | 0.103  | 0.31715  | 1 | REACTOME_TRANSPORT_OF_MATURE_TRANSCRIPT_TO_<br>CYTOPLASM                                                               |
| REACTOME_METABOLISM_OF... | 188 | 0.0397 | 0.00403  | 0.053  | 0.22708  | 1 | REACTOME_METABOLISM_OF_AMINO_ACIDS_AND_DERI<br>VATIVES                                                                 |
| REACTOME_RNA_POL_I_TRA... | 66  | -0.107 | -0.00645 | 0.0954 | 0.86887  | 1 | REACTOME_RNA_POL_I_TRANSCRIPTION                                                                                       |
| REACTOME_FATTY_ACYL_CO... | 17  | 0.185  | 0.00567  | 0.185  | 0.15846  | 1 | REACTOME_FATTY_ACYL_COA_BIOSYNTHESIS                                                                                   |
| REACTOME_E2F_ENABLED_I... | 10  | 0.227  | 0.00534  | 0.258  | 0.18946  | 1 | REACTOME_E2F_ENABLED_INHIBITION_OF_PRE_REPLICA<br>TION_COMPLEX_FORMATION                                               |
| REACTOME_P75NTR_RECRUI... | 10  | 0.453  | 0.0106   | 0.22   | 0.01973  | 1 | REACTOME_P75NTR_RECRUITS_SIGNALLING_COMPLEXES                                                                          |
| REACTOME_BIOLOGICAL_OX... | 134 | 0.0034 | 0.000292 | 0.0746 | 0.48182  | 1 | REACTOME_BIOLOGICAL_OXIDATIONS                                                                                         |
| REACTOME_REGULATED_PRO... | 10  | 0.0264 | 0.00062  | 0.225  | 0.45341  | 1 | REACTOME_REGULATED_PROTEOLYSIS_OF_P75NTR                                                                               |



|                           |     |          |           |        |          |   |                                                                                          |
|---------------------------|-----|----------|-----------|--------|----------|---|------------------------------------------------------------------------------------------|
| REACTOME_TRANSMISSION_... | 175 | 0.0236   | 0.00231   | 0.0621 | 0.35207  | 1 | REACTOME_TRANSMISSION_ACROSS_CHEMICAL_SYNAPSES                                           |
| REACTOME_P75NTR_SIGNAL... | 12  | 0.413    | 0.0106    | 0.202  | 0.020688 | 1 | REACTOME_P75NTR_SIGNALS_VIA_NFKB                                                         |
| REACTOME_CASPASE_MEDIA... | 12  | -0.293   | -0.00755  | 0.192  | 0.93665  | 1 | REACTOME_CASPASE_MEDIATED_CLEAVAGE_OF_CYTOSKELETAL_PROTEINS                              |
| REACTOME_INTEGRIN_CELL... | 77  | 0.0998   | 0.0065    | 0.0885 | 0.12983  | 1 | REACTOME_INTEGRIN_CELL_SURFACE_INTERACTIONS                                              |
| REACTOME_REGULATION_OF... | 47  | -0.0206  | -0.00105  | 0.106  | 0.57741  | 1 | REACTOME_REGULATION_OF_ORNITHINE_DECARBOXYLASE_ODC                                       |
| REACTOME_CYTOCHROME_P4... | 50  | 0.00937  | 0.000492  | 0.122  | 0.46942  | 1 | REACTOME_CYTOCHROME_P450_ARRANGED_BY_SUBSTRATE_RATE_TYPE                                 |
| REACTOME_BASE_FREE_SUG... | 10  | 0.145    | 0.00342   | 0.251  | 0.28157  | 1 | REACTOME_BASE_FREE_SUGAR_PHOSPHATE_REMOVAL_VIA_THE_SINGLE_NUCLEOTIDE_REPLACEMENT_PATHWAY |
| REACTOME_APOPTOTIC_CLE... | 11  | -0.305   | -0.00752  | 0.275  | 0.8663   | 1 | REACTOME_APOPTOTIC_CLEAVAGE_OF_CELL_ADHESION_PROTEINS                                    |
| REACTOME_HDL_MEDIATED_... | 15  | 0.025    | 0.00072   | 0.188  | 0.44715  | 1 | REACTOME_HDL_MEDIATED_LIPID_TRANSPORT                                                    |
| REACTOME_NRAGE_SIGNALS... | 37  | 0.0523   | 0.00237   | 0.13   | 0.34324  | 1 | REACTOME_NRAGE_SIGNALS_DEATH_THROUGH_JNK                                                 |
| REACTOME_SLBP_DEPENDEN... | 11  | 0.0757   | 0.00187   | 0.188  | 0.34333  | 1 | REACTOME_SLBP_DEPENDENT_PROCESSING_OF_REPLICATION_DEPENDENT_HISTONE_PRE_MRNAs            |
| REACTOME_NRIF_SIGNALS_... | 14  | 0.26     | 0.00725   | 0.192  | 0.087896 | 1 | REACTOME_NRIF_SIGNALS_CELL_DEATH_FROM_THE_NUCLEUS                                        |
| REACTOME_REGULATION_OF... | 54  | 0.0753   | 0.00411   | 0.104  | 0.23434  | 1 | REACTOME_REGULATION_OF_APOPTOSIS                                                         |
| REACTOME_RNA_POL_II_TR... | 96  | -0.00662 | -0.000481 | 0.0721 | 0.53656  | 1 | REACTOME_RNA_POL_II_TRANSCRIPTION                                                        |
| REACTOME_NEURONAL_SYSTEM  | 265 | 0.0263   | 0.00317   | 0.0517 | 0.30514  | 1 | REACTOME_NEURONAL_SYSTEM                                                                 |
| REACTOME_REGULATION_OF... | 30  | -0.216   | -0.0088   | 0.149  | 0.92605  | 1 | REACTOME_REGULATION_OF_BETA_CELL_DEVELOPMENT                                             |
| REACTOME_PHASE1_FUNC...   | 67  | -0.0401  | -0.00244  | 0.107  | 0.64552  | 1 | REACTOME_PHASE1_FUNCTIONALIZATION_OF_COMPOUNDS                                           |
| REACTOME_RNA_POL_III_T... | 33  | -0.125   | -0.00533  | 0.123  | 0.84499  | 1 | REACTOME_RNA_POL_III_TRANSCRIPTION                                                       |
| REACTOME_CELL_DEATH_SI... | 51  | 0.108    | 0.00574   | 0.107  | 0.15556  | 1 | REACTOME_CELL_DEATH_SIGNALLING_VIA_NRAGE_NRIF_AND_NADE                                   |

|                           |     |          |           |        |          |   |                                                                   |
|---------------------------|-----|----------|-----------|--------|----------|---|-------------------------------------------------------------------|
| REACTOME_NEUROTRANSMIT... | 32  | 0.0575   | 0.00242   | 0.144  | 0.34502  | 1 | REACTOME_NEUROTRANSMITTER_RELEASE_CYCLE                           |
| REACTOME_P75_NTR_RECEP... | 71  | 0.155    | 0.00969   | 0.0906 | 0.043768 | 1 | REACTOME_P75_NTR_RECEPTOR_MEDIATED_SIGNALLING                     |
| REACTOME_AMINO_ACID_TR... | 28  | -0.114   | -0.00448  | 0.144  | 0.78582  | 1 | REACTOME_AMINO_ACID_TRANSPORT_ACROSS_THE_PLASMA_MEMBRANE          |
| REACTOME_ENDOGENOUS_ST... | 15  | -0.201   | -0.0058   | 0.205  | 0.83667  | 1 | REACTOME_ENDOGENOUS_STEROLS                                       |
| REACTOME_REGULATION_OF... | 20  | 0.043    | 0.00143   | 0.175  | 0.40317  | 1 | REACTOME_REGULATION_OF_GENE_EXPRESSION_IN_BETA_TLymphocytes       |
| REACTOME_GLYCOLYSIS       | 25  | -0.0247  | -0.000918 | 0.149  | 0.56573  | 1 | REACTOME_GLYCOLYSIS                                               |
| REACTOME_PROCESSIVE_SY... | 13  | -0.233   | -0.00624  | 0.174  | 0.90982  | 1 | REACTOME_PROCESSIVE_SYNTHESIS_ON_THE_LAGGING_STRAND               |
| REACTOME_PEPTIDE_CHAIN... | 79  | 0.121    | 0.00796   | 0.0782 | 0.061398 | 1 | REACTOME_PEPTIDE_CHAIN_ELONGATION                                 |
| REACTOME_COMMON_PATHWAY   | 14  | -0.518   | -0.0144   | 0.209  | 0.99344  | 1 | REACTOME_COMMON_PATHWAY                                           |
| REACTOME_MRNA_CAPPING     | 27  | -0.0746  | -0.00288  | 0.13   | 0.71746  | 1 | REACTOME_MRNA_CAPPING                                             |
| REACTOME_MITOCHONDRIAL... | 14  | 0.186    | 0.00517   | 0.191  | 0.16529  | 1 | REACTOME_MITOCHONDRIAL_FATTY_ACID_BETA_OXIDATION                  |
| REACTOME_SIGNALING_BY_... | 824 | -0.00403 | -0.00084  | 0.0314 | 0.55108  | 1 | REACTOME_SIGNALING_BY_GPCR                                        |
| REACTOME_PEPTIDE_LIGAN... | 169 | 0.11     | 0.0106    | 0.0664 | 0.048728 | 1 | REACTOME_PEPTIDE_LIGAND_BINDING_RECEPTORS                         |
| REACTOME_METABOLISM_OF... | 13  | 0.215    | 0.00578   | 0.176  | 0.11083  | 1 | REACTOME_METABOLISM_OF_POLYAMINES                                 |
| REACTOME_CLASS_A1_RHOD... | 275 | 0.0308   | 0.00377   | 0.0511 | 0.27318  | 1 | REACTOME_CLASS_A1_RHODOPSIN_LIKE_RECEPTORS                        |
| REACTOME_NOTCH_HLH_TRA... | 11  | -0.209   | -0.00517  | 0.275  | 0.77664  | 1 | REACTOME_NOTCH_HLH_TRANSCRIPTION_PATHWAY                          |
| REACTOME_INTEGRATION_O... | 113 | 0.00479  | 0.000377  | 0.0723 | 0.47361  | 1 | REACTOME_INTEGRATION_OF_ENERGY_METABOLISM                         |
| REACTOME_CELL_CYCLE_MI... | 296 | 0.0556   | 0.00705   | 0.0438 | 0.10238  | 1 | REACTOME_CELL_CYCLE_MITOTIC                                       |
| REACTOME_GLUCONEOGENESIS  | 29  | -0.0956  | -0.00383  | 0.138  | 0.75592  | 1 | REACTOME_GLUCONEOGENESIS                                          |
| REACTOME_DOPAMINE_NEUR... | 10  | -0.147   | -0.00345  | 0.224  | 0.74384  | 1 | REACTOME_DOPAMINE_NEUROTRANSMITTER_RELEASE_CYCLE                  |
| REACTOME_OPIOID_SIGNAL... | 77  | 0.00584  | 0.000381  | 0.0881 | 0.47355  | 1 | REACTOME_OPIOID_SIGNALLING                                        |
| REACTOME_RECRUITMENT_O... | 61  | 0.107    | 0.00624   | 0.105  | 0.15273  | 1 | REACTOME_RECRUITMENT_OF_MITOTIC_CENTROSOME_PROTEINS_AND_COMPLEXES |

|                           |     |         |           |        |          |   |                                                                                                                      |
|---------------------------|-----|---------|-----------|--------|----------|---|----------------------------------------------------------------------------------------------------------------------|
| REACTOME_MITOCHONDRIAL... | 21  | -0.366  | -0.0125   | 0.165  | 0.98675  | 1 | REACTOME_MITOCHONDRIAL_TRNA_AMINOACYLATION                                                                           |
| REACTOME_CYTOSOLIC_TRN... | 24  | -0.127  | -0.00461  | 0.138  | 0.81985  | 1 | REACTOME_CYTOSOLIC_TRNA_AMINOACYLATION                                                                               |
| REACTOME_CA_DEPENDENT_... | 29  | 0.0177  | 0.000708  | 0.159  | 0.45565  | 1 | REACTOME_CA_DEPENDENT_EVENTS                                                                                         |
| REACTOME_ACETYLCHOLINE... | 10  | 0.0618  | 0.00145   | 0.251  | 0.40258  | 1 | REACTOME_ACETYLCHOLINE_NEUROTRANSMITTER_RELEASE_CYCLE                                                                |
| REACTOME_ADENYLATE_CYC... | 10  | -0.263  | -0.00618  | 0.265  | 0.83898  | 1 | REACTOME_ADENYLATE_CYCLASE_ACTIVATING_PATHWAY                                                                        |
| REACTOME_ADENYLATE_CYC... | 13  | -0.11   | -0.00294  | 0.212  | 0.69793  | 1 | REACTOME_ADENYLATE_CYCLASE_INHIBITORY_PATHWAY                                                                        |
| REACTOME_DARPP_32_EVENTS  | 24  | -0.0345 | -0.00126  | 0.164  | 0.58319  | 1 | REACTOME_DARPP_32_EVENTS                                                                                             |
| REACTOME_CHEMOKINE_REC... | 51  | 0.234   | 0.0124    | 0.126  | 0.031791 | 1 | REACTOME_CHEMOKINE_RECEPTORS_BINDING_CHEMOKINES                                                                      |
| REACTOME_LOSS_OF_NLP_F... | 54  | 0.105   | 0.00575   | 0.11   | 0.16856  | 1 | REACTOME_LOSS_OF_NLP_FROM_MITOTIC_CENTROSOMES                                                                        |
| REACTOME_NEUROTRANSMIT... | 128 | 0.0301  | 0.00252   | 0.0724 | 0.33901  | 1 | REACTOME_NEUROTRANSMITTER_RECEPTOR_BINDING_AND_DOWNSTREAM_TRANSMISSION_IN_THE_POSTSYNAPTIC_CELL                      |
| REACTOME_CELL_CYCLE_CH... | 109 | 0.0881  | 0.00682   | 0.0701 | 0.1045   | 1 | REACTOME_CELL_CYCLE_CHECKPOINTS                                                                                      |
| REACTOME_DIABETES_PATH... | 124 | 0.105   | 0.00866   | 0.0646 | 0.052125 | 1 | REACTOME_DIABETES_PATHWAYS                                                                                           |
| REACTOME_P130CAS_LINKA... | 15  | -0.115  | -0.00333  | 0.205  | 0.71321  | 1 | REACTOME_P130CAS_LINKAGE_TO_MAPK_SIGNALING_FACTOR_INTEGRINS                                                          |
| REACTOME_GLYCOPROTEIN_... | 12  | -0.0356 | -0.000916 | 0.235  | 0.56003  | 1 | REACTOME_GLYCOPROTEIN_HORMONES                                                                                       |
| REACTOME_NOREPINEPHRIN... | 9   | -0.166  | -0.0037   | 0.248  | 0.74772  | 1 | REACTOME_NOREPINEPHRINE_NEUROTRANSMITTER_RELEASE_CYCLE                                                               |
| REACTOME_PLC_BETA_MEDI... | 42  | 0.0623  | 0.003     | 0.126  | 0.31036  | 1 | REACTOME_PLC_BETA_MEDIATED_EVENTS                                                                                    |
| REACTOME_REGULATION_OF... | 16  | -0.0509 | -0.00151  | 0.208  | 0.59662  | 1 | REACTOME_REGULATION_OF_INSULIN_LIKE_GROWTH_FACTOR_IGF_ACTIVITY_BY_INSULIN_LIKE_GROWTH_FACTOR_BINDING_PROTEINS_IGFBP3 |
| REACTOME_GRB2_SOS_PROV... | 15  | -0.119  | -0.00343  | 0.202  | 0.72246  | 1 | REACTOME_GRB2_SOS_PROVIDES_LINKAGE_TO_MAPK_SIGNALING_FOR_INTEGRINS                                                   |
| REACTOME_PEPTIDE_HORMO... | 14  | -0.0871 | -0.00242  | 0.217  | 0.65577  | 1 | REACTOME_PEPTIDE_HORMONE_BIOSYNTHESIS                                                                                |
| REACTOME_G_PROTEIN_ACT... | 27  | 0.0409  | 0.00158   | 0.138  | 0.38344  | 1 | REACTOME_G_PROTEIN_ACTIVATION                                                                                        |

|                           |     |         |          |        |          |   |                                                                                                                                                                     |
|---------------------------|-----|---------|----------|--------|----------|---|---------------------------------------------------------------------------------------------------------------------------------------------------------------------|
| REACTOME_ACETYLCHOLINE... | 14  | 0.161   | 0.00448  | 0.258  | 0.266    | 1 | REACTOME_ACETYLCHOLINE_BINDING_AND_DOWNSTRE<br>AM_EVENTS                                                                                                            |
| REACTOME_ABC_FAMILY_PR... | 32  | -0.177  | -0.00744 | 0.131  | 0.91156  | 1 | REACTOME_ABC_FAMILY_PROTEINS_MEDIATED_TRANSP<br>ORT                                                                                                                 |
| REACTOME_TRNA_AMINOACY... | 42  | -0.215  | -0.0104  | 0.109  | 0.97586  | 1 | REACTOME_TRNA_AMINOACYLATION                                                                                                                                        |
| REACTOME_OLFACTORY_SIG... | 277 | -0.0096 | -0.00118 | 0.0641 | 0.55947  | 1 | REACTOME_OLFACTORY_SIGNALING_PATHWAY                                                                                                                                |
| REACTOME_STEROID_HORMONES | 29  | -0.119  | -0.00478 | 0.142  | 0.79993  | 1 | REACTOME_STEROID_HORMONES                                                                                                                                           |
| REACTOME_PKA_MEDIATED_... | 17  | -0.0533 | -0.00163 | 0.201  | 0.6048   | 1 | REACTOME_PKA_MEDIATED_PHOSPHORYLATION_OF_CR<br>EB                                                                                                                   |
| REACTOME_RECRUITMENT_O... | 10  | 0.0294  | 0.000692 | 0.307  | 0.46188  | 1 | REACTOME_RECRUITMENT_OF_NUMA_TO_MITOTIC_CE<br>NTROSOMES                                                                                                             |
| REACTOME_AMINE_DERIVED... | 15  | 0.143   | 0.00413  | 0.2    | 0.2366   | 1 | REACTOME_AMINE_DERIVED_HORMONES                                                                                                                                     |
| REACTOME_TRANSMEMBRANE... | 392 | 0.00795 | 0.00116  | 0.0398 | 0.42084  | 1 | REACTOME_TRANSMEMBRANE_TRANSPORT_OF_SMALL_<br>MOLECULES                                                                                                             |
| REACTOME_INTEGRIN_ALPH... | 27  | 0.0726  | 0.0028   | 0.139  | 0.30105  | 1 | REACTOME_INTEGRIN_ALPHAIIIB_BETA3_SIGNALING                                                                                                                         |
| REACTOME_NUCLEAR_RECEP... | 45  | 0.206   | 0.0103   | 0.124  | 0.047391 | 1 | REACTOME_NUCLEAR_RECEPTOR_TRANSCRIPTION_PATH<br>WAY                                                                                                                 |
| REACTOME_INSULIN_SYNT...  | 20  | -0.0427 | -0.00142 | 0.181  | 0.59346  | 1 | REACTOME_INSULIN_SYNTHESIS_AND_PROCESSING                                                                                                                           |
| REACTOME_CYCLIN_E_ASSO... | 61  | 0.142   | 0.00825  | 0.0957 | 0.068637 | 1 | REACTOME_CYCLIN_E_ASSOCIATED_EVENTS_DURING_G1<br>_S_TRANSITION_<br>REACTOME_HOMOLOGOUS_RECOMBINATION_REPAIR_O<br>F_REPLICATION_INDEPENDENT_DOUBLE_STRAND_BREAK<br>S |
| REACTOME_HOMOLOGOUS_RE... | 16  | -0.196  | -0.00584 | 0.184  | 0.85689  | 1 |                                                                                                                                                                     |
| REACTOME_G1_PHASE         | 34  | 0.109   | 0.00472  | 0.134  | 0.20807  | 1 | REACTOME_G1_PHASE                                                                                                                                                   |
| REACTOME_ELEVATION_OF_... | 8   | 0.0352  | 0.000741 | 0.277  | 0.44946  | 1 | REACTOME_ELEVATION_OF_CYTOSOLIC_CA2_LEVELS                                                                                                                          |
| REACTOME_P53_DEPENDENT... | 52  | 0.0627  | 0.00336  | 0.102  | 0.26967  | 1 | REACTOME_P53_DEPENDENT_G1_DNA_DAMAGE_RESPO<br>NSE                                                                                                                   |
| REACTOME_TRANSCRIPTION... | 42  | -0.295  | -0.0142  | 0.109  | 0.99659  | 1 | REACTOME_TRANSCRIPTION_COUPLED_NER_TC_NER                                                                                                                           |

|                           |     |           |           |        |          |   |                                                                           |
|---------------------------|-----|-----------|-----------|--------|----------|---|---------------------------------------------------------------------------|
| REACTOME_RNA_POL_II_TR... | 37  | -0.179    | -0.00808  | 0.118  | 0.93576  | 1 | REACTOME_RNA_POL_II_TRANSCRIPTION_PRE_INITIATION_AND_PROMOTER_OPENING     |
| REACTOME_GLUCAGON_SIGN... | 33  | 0.00621   | 0.000265  | 0.136  | 0.48181  | 1 | REACTOME_GLUCAGON_SIGNALING_IN_METABOLIC_REGULATION                       |
| REACTOME_MRNA_PROCESSING  | 147 | 0.0221    | 0.00199   | 0.0595 | 0.35481  | 1 | REACTOME_MRNA_PROCESSING                                                  |
| REACTOME_SIGNALING_BY_... | 115 | 0.0087    | 0.000692  | 0.0734 | 0.45285  | 1 | REACTOME_SIGNALING_BY_PDGF                                                |
| REACTOME_ASSOCIATION_O... | 25  | -0.000994 | -3.69E-05 | 0.136  | 0.50292  | 1 | REACTOME_ASSOCIATION_OF_TRIC_CCT_WITH_TARGET_PROTEINS_DURING_BIOSYNTHESIS |
| REACTOME_PREFOLDIN_MED... | 26  | 0.199     | 0.00753   | 0.142  | 0.080347 | 1 | REACTOME_PREFOLDIN_MEDIATED_TRANSFER_OF_SUBSTRATE_TO_CCT_TRIC             |
| REACTOME_HORMONE_LIGAN... | 10  | 0.0806    | 0.0019    | 0.245  | 0.37128  | 1 | REACTOME_HORMONE_LIGAND_BINDING_RECEPTORS                                 |
| REACTOME_GPVI_MEDIATED... | 31  | 0.0911    | 0.00377   | 0.144  | 0.264    | 1 | REACTOME_GPVI_MEDIATED_ACTIVATION_CASCADE                                 |
| REACTOME_PROTEIN_FOLDING  | 49  | 0.0341    | 0.00177   | 0.103  | 0.37015  | 1 | REACTOME_PROTEIN_FOLDING                                                  |
| REACTOME_FORMATION_OF_... | 21  | 0.346     | 0.0118    | 0.161  | 0.016055 | 1 | REACTOME_FORMATION_OF_TUBULIN_FOLDING_INTERMEDIATES_BY_CCT_TRIC           |
| REACTOME_PEROXISOMAL_L... | 19  | -0.152    | -0.00492  | 0.173  | 0.80953  | 1 | REACTOME_PEROXISOMAL_LIPID_METABOLISM                                     |
| REACTOME_POST_CHAPERON... | 18  | 0.233     | 0.00735   | 0.191  | 0.11134  | 1 | REACTOME_POST_CHAPERONIN_TUBULIN_FOLDING_PATHWAY                          |
| REACTOME_STRIATED_MUSC... | 26  | -0.048    | -0.00182  | 0.149  | 0.62598  | 1 | REACTOME_STRIATED_MUSCLE_CONTRACTION                                      |
| REACTOME_METABOLISM_OF... | 70  | -0.074    | -0.0046   | 0.0927 | 0.78753  | 1 | REACTOME_METABOLISM_OF_NUCLEOTIDES                                        |
| REACTOME_AMINE_LIGAND_... | 36  | -0.372    | -0.0166   | 0.15   | 0.99333  | 1 | REACTOME_AMINE_LIGAND_BINDING_RECEPTORS                                   |
| REACTOME_METABOLISM_OF... | 396 | 0.0211    | 0.0031    | 0.0361 | 0.27917  | 1 | REACTOME_METABOLISM_OF_PROTEINS                                           |
| REACTOME_DOWNSTREAM_SI... | 89  | 0.0233    | 0.00163   | 0.083  | 0.38966  | 1 | REACTOME_DOWNSTREAM_SIGNAL_TRANSDUCTION                                   |
| REACTOME_MUSCLE_CONTRA... | 45  | 0.0182    | 0.000908  | 0.115  | 0.43708  | 1 | REACTOME_MUSCLE_CONTRACTION                                               |
| REACTOME_SEROTONIN_REC... | 11  | -0.615    | -0.0152   | 0.268  | 0.98925  | 1 | REACTOME_SEROTONIN_RECEPTORS                                              |
| REACTOME_CDC6_ASSOCIAT... | 11  | 0.05      | 0.00123   | 0.235  | 0.41583  | 1 | REACTOME_CDC6_ASSOCIATION_WITH_THE_ORC_ORIGIN_COMPLEX                     |
| REACTOME_M_G1_TRANSITION  | 74  | 0.0178    | 0.00114   | 0.0821 | 0.41426  | 1 | REACTOME_M_G1_TRANSITION                                                  |
| REACTOME_MRNA_SPLICING    | 100 | 0.0797    | 0.00591   | 0.0729 | 0.13729  | 1 | REACTOME_MRNA_SPLICING                                                    |
| REACTOME_MRNA_SPLICING... | 41  | 0.0318    | 0.00151   | 0.111  | 0.38728  | 1 | REACTOME_MRNA_SPLICING_MINOR_PATHWAY                                      |

|                           |     |           |           |        |          |   |                                                                      |
|---------------------------|-----|-----------|-----------|--------|----------|---|----------------------------------------------------------------------|
| REACTOME_3_UTR_MEDIATE... | 97  | 0.0919    | 0.00671   | 0.0697 | 0.093636 | 1 | REACTOME_3_UTR_MEDIATED_TRANSLATIONAL_REGULATION                     |
| REACTOME_PROCESSING_OF... | 22  | 0.0073    | 0.000255  | 0.129  | 0.47735  | 1 | REACTOME_PROCESSING_OF_CAPPED_INTRONLESS_PRE_MRNA                    |
| REACTOME_PURINE_RIBONU... | 11  | 0.144     | 0.00356   | 0.191  | 0.22477  | 1 | REACTOME_PURINE_RIBONUCLEOSIDE_MONOPHOSPHATE_BIOSYNTHESIS            |
| REACTOME_G1_S_TRANSITION  | 101 | 0.0699    | 0.00521   | 0.0722 | 0.16664  | 1 | REACTOME_G1_S_TRANSITION                                             |
| REACTOME_CITRIC_ACID_C... | 18  | 0.071     | 0.00224   | 0.184  | 0.35002  | 1 | REACTOME_CITRIC_ACID_CYCLE_TCA_CYCLE                                 |
| REACTOME_TRANSCRIPTION    | 181 | -0.000303 | -3.01E-05 | 0.0544 | 0.50222  | 1 | REACTOME_TRANSCRIPTION                                               |
| REACTOME_POL_SWITCHING    | 11  | -0.312    | -0.0077   | 0.189  | 0.95029  | 1 | REACTOME_POL_SWITCHING                                               |
| REACTOME_NUCLEOTIDE_EX... | 47  | -0.282    | -0.0144   | 0.103  | 0.99692  | 1 | REACTOME_NUCLEOTIDE_EXCISION_REPAIR                                  |
| REACTOME_REGULATION_OF... | 7   | 0.297     | 0.00584   | 0.302  | 0.16271  | 1 | REACTOME_REGULATION_OF_THE_FANCONI_ANEMIA_PATHWAY                    |
| REACTOME_AXON_GUIDANCE    | 228 | -0.00629  | -0.000703 | 0.0518 | 0.5484   | 1 | REACTOME_AXON_GUIDANCE                                               |
| REACTOME_ACTIVATION_OF... | 43  | 0.06      | 0.00292   | 0.104  | 0.28289  | 1 | REACTOME_ACTIVATION_OF_CHAPERONE_GENES_BY_XBP1S                      |
| REACTOME_REGULATION_OF... | 42  | -0.00825  | -0.000397 | 0.122  | 0.52704  | 1 | REACTOME_REGULATION_OF_INSULIN_SECRETION_BY_GLUCAGON_LIKE_PEPTIDE1   |
| REACTOME_G_ALPHA_Q_SIG... | 171 | 0.136     | 0.0132    | 0.0629 | 0.015277 | 1 | REACTOME_G_ALPHA_Q_SIGNALLING_EVENTS                                 |
| REACTOME_P2Y_RECEPTORS    | 9   | -0.0483   | -0.00108  | 0.242  | 0.57895  | 1 | REACTOME_P2Y_RECEPTORS                                               |
| REACTOME_TRAFFICKING_O... | 26  | 0.124     | 0.0047    | 0.161  | 0.22045  | 1 | REACTOME_TRAFFICKING_OF_AMPA_RECEPTORS                               |
| REACTOME_NCAM1_INTERAC... | 38  | -0.00458  | -0.00021  | 0.133  | 0.51376  | 1 | REACTOME_NCAM1_INTERACTIONS                                          |
| REACTOME_CLASS_C_3_MET... | 14  | 0.027     | 0.000752  | 0.21   | 0.44884  | 1 | REACTOME_CLASS_C_3_METABOTROPIC_Glutamate_HEROMONE_RECEPTORS         |
| REACTOME_REGULATION_OF... | 87  | -0.0486   | -0.00336  | 0.0844 | 0.71734  | 1 | REACTOME_REGULATION_OF_INSULIN_SECRETION                             |
| REACTOME_NCAM_SIGNALIN... | 63  | -0.2      | -0.0118   | 0.0967 | 0.98044  | 1 | REACTOME_NCAM_SIGNALING_FOR_NEURITE_OUTGROWTH                        |
| REACTOME_INHIBITION_OF... | 25  | -0.113    | -0.00421  | 0.149  | 0.77693  | 1 | REACTOME_INHIBITION_OF_INSULIN_SECRETION_BY_ADRENALINE_NORADRENALINE |
| REACTOME_NUCLEOTIDE_LI... | 13  | -0.113    | -0.00304  | 0.21   | 0.70568  | 1 | REACTOME_NUCLEOTIDE_LIKE_PURINERGIC_RECEPTORS                        |
| REACTOME_ACTIVATION_OF... | 10  | 0.0967    | 0.00227   | 0.19   | 0.30546  | 1 | REACTOME_ACTIVATION_OF_CHAPERONES_BY_ATF6_ALPHA                      |

|                           |     |          |           |        |          |   |                                                                             |
|---------------------------|-----|----------|-----------|--------|----------|---|-----------------------------------------------------------------------------|
| REACTOME_TRANSPORT_OF_... | 32  | -0.0287  | -0.00121  | 0.123  | 0.59229  | 1 | REACTOME_TRANSPORT_OF_MATURE_MRNA_DERIVED_FROM_AN_INTRONLESS_TRANSCRIPT     |
| REACTOME_EICOSANOID_LI... | 14  | 0.0859   | 0.00239   | 0.212  | 0.34251  | 1 | REACTOME_EICOSANOID_LIGAND_BINDING_RECEPTORS                                |
| REACTOME_ACTIVATION_OF... | 23  | 0.297    | 0.0106    | 0.138  | 0.015392 | 1 | REACTOME_ACTIVATION_OF_GENES_BY_ATF4                                        |
| REACTOME_UNFOLDED_PROT... | 73  | 0.165    | 0.0105    | 0.0791 | 0.018287 | 1 | REACTOME_UNFOLDED_PROTEIN_RESPONSE                                          |
| REACTOME_CLASS_B_2_SEC... | 85  | -0.0571  | -0.00391  | 0.0859 | 0.74679  | 1 | REACTOME_CLASS_B_2_SECRETIN_FAMILY_RECEPTORS                                |
| REACTOME_GLUCAGON_TYPE... | 33  | -0.0501  | -0.00214  | 0.135  | 0.64506  | 1 | REACTOME_GLUCAGON_TYPE_LIGAND_RECEPTORS                                     |
| REACTOME_REGULATION_OF... | 10  | 0.174    | 0.00409   | 0.276  | 0.26438  | 1 | REACTOME_REGULATION_OF_INSULIN_SECRETION_BY_A_CETYLCHOLINE                  |
| REACTOME_G_ALPHA1213_S... | 68  | 0.0428   | 0.00262   | 0.0937 | 0.32384  | 1 | REACTOME_G_ALPHA1213_SIGNALLING_EVENTS                                      |
| REACTOME_FANCONI_ANEMI... | 20  | 0.178    | 0.00593   | 0.171  | 0.14804  | 1 | REACTOME_FANCONI_ANEMIA_PATHWAY                                             |
| REACTOME_TRAFFICKING_O... | 14  | 0.204    | 0.00568   | 0.203  | 0.15782  | 1 | REACTOME_TRAFFICKING_OF_GLUR2_CONTAINING_AMP_A_RECEPTORS                    |
| REACTOME_ACTIVATION_OF... | 9   | 0.137    | 0.00307   | 0.196  | 0.24166  | 1 | REACTOME_ACTIVATION_OF_CHAPERONE_GENES_BY_ATF6_ALPHA                        |
| REACTOME_PROSTANOID_LI... | 9   | 0.00523  | 0.000117  | 0.24   | 0.4913   | 1 | REACTOME_PROSTANOID_LIGAND_RECEPTORS                                        |
| REACTOME_OPSINS           | 7   | -0.0336  | -0.00066  | 0.241  | 0.55539  | 1 | REACTOME_OPSINS                                                             |
| REACTOME_FORMATION_OF_... | 41  | -0.0565  | -0.00269  | 0.107  | 0.70099  | 1 | REACTOME_FORMATION_OF_RNA_POL_II_ELONGATION_COMPLEX                         |
| REACTOME_MRNA_3_END_PR... | 31  | 0.114    | 0.00473   | 0.126  | 0.18284  | 1 | REACTOME_MRNA_3_END_PROCESSING                                              |
| REACTOME_POST_TRANSLAT... | 24  | 0.182    | 0.00662   | 0.137  | 0.092755 | 1 | REACTOME_POST_TRANSLATIONAL_MODIFICATION_SYNTHESIS_OF_GPI_ANCHORED_PROTEINS |
| REACTOME_CYCLIN_A_B1_A... | 15  | 0.119    | 0.00342   | 0.183  | 0.25835  | 1 | REACTOME_CYCLIN_A_B1_ASSOCIATED_EVENTS_DURING_G2_M_TRANSITION               |
| REACTOME_ELONGATION_AR... | 31  | -0.00128 | -5.28E-05 | 0.127  | 0.50402  | 1 | REACTOME_ELONGATION_ARREST_AND_RECOVERY                                     |
| REACTOME_SLC_MEDIATED_... | 232 | 0.0268   | 0.00302   | 0.0507 | 0.29844  | 1 | REACTOME_SLC_MEDIATED_TRANSMEMBRANE_TRANSPORT                               |
| REACTOME_ADP_SIGNALLIN... | 25  | 0.0605   | 0.00225   | 0.153  | 0.34598  | 1 | REACTOME_ADP_SIGNALLING_THROUGH_P2RY1                                       |
| REACTOME_G_BETA_GAMMA_... | 20  | 0.0136   | 0.000452  | 0.16   | 0.46618  | 1 | REACTOME_G_BETA_GAMMA_SIGNALLING_THROUGH_PLATELET_ALPHA_2B_RECEPTOR         |
| REACTOME_CD28_CO_STIMU... | 31  | -0.082   | -0.00339  | 0.134  | 0.72984  | 1 | REACTOME_CD28_CO-STIMULATION                                                |

|                           |     |         |           |        |          |   |                                                                                                            |
|---------------------------|-----|---------|-----------|--------|----------|---|------------------------------------------------------------------------------------------------------------|
| REACTOME_GPCR_DOWNSTRE... | 719 | 0.0224  | 0.00438   | 0.034  | 0.25508  | 1 | REACTOME_GPCR_DOWNSTREAM_SIGNALING                                                                         |
| REACTOME_SYNTHESIS_SEC... | 15  | 0.0475  | 0.00137   | 0.185  | 0.39858  | 1 | REACTOME_SYNTHESIS_SECRETION_AND_DEACYLATION_OF_GHRELIN                                                    |
| REACTOME_ADHERENS_JUNC... | 27  | -0.0591 | -0.00228  | 0.173  | 0.63368  | 1 | REACTOME_ADHERENS_JUNCTIONS_INTERACTIONS                                                                   |
| REACTOME_CRMP5_IN_SEMA... | 13  | -0.0504 | -0.00135  | 0.218  | 0.5915   | 1 | REACTOME_CRMP5_IN_SEMA3A_SIGNALING                                                                         |
| REACTOME_OTHER_SEMAPHO... | 14  | 0.0168  | 0.000466  | 0.219  | 0.46952  | 1 | REACTOME_OTHER_SEMAPHORIN_INTERACTIONS                                                                     |
| REACTOME_ACTIVATION_OF... | 13  | 0.443   | 0.0119    | 0.231  | 0.027579 | 1 | REACTOME_ACTIVATION_OF_RAC                                                                                 |
| REACTOME_PURINE_SALVAGE   | 12  | 0.00774 | 0.000199  | 0.261  | 0.48815  | 1 | REACTOME_PURINE_SALVAGE                                                                                    |
| REACTOME_G_ALPHA_I_SIG... | 181 | -0.0022 | -0.000219 | 0.0609 | 0.51438  | 1 | REACTOME_G_ALPHA_I_SIGNALLING_EVENTS                                                                       |
| REACTOME_SEMA3A_PAK_DE... | 13  | -0.108  | -0.00289  | 0.21   | 0.69613  | 1 | REACTOME_SEMA3A_PAK_DEPENDENT_AXON_REPULSION                                                               |
| REACTOME_CD28_DEPENDEN... | 11  | -0.232  | -0.00572  | 0.229  | 0.84421  | 1 | REACTOME_CD28_DEPENDENT_VAV1_PATHWAY                                                                       |
| REACTOME_SEMA4D_IN_SEM... | 29  | -0.148  | -0.00594  | 0.147  | 0.84356  | 1 | REACTOME_SEMA4D_IN_SEMAPHORIN_SIGNALING                                                                    |
| REACTOME_SEMAPHORIN_IN... | 62  | -0.107  | -0.00627  | 0.0966 | 0.86655  | 1 | REACTOME_SEMAPHORIN_INTERACTIONS                                                                           |
| REACTOME_SEMA4D_INDUCE... | 24  | -0.129  | -0.00471  | 0.159  | 0.7912   | 1 | REACTOME_SEMA4D_INDUCED_CELL_MIGRATION_AND_GROWTH_CONE_COLLAPSE                                            |
| REACTOME_SEMA3A_PLEXIN... | 12  | -0.0318 | -0.000819 | 0.208  | 0.56071  | 1 | REACTOME_SEMA3A_PLEXIN_REPULSION_SIGNALING_BY_INHIBITING_INTEGRIN_ADHESION                                 |
| REACTOME_LYSOSOME_VESI... | 21  | -0.0615 | -0.0021   | 0.163  | 0.64707  | 1 | REACTOME_LYSOSOME_VESICLE_BIOGENESIS                                                                       |
| REACTOME_G_BETA_GAMMA_... | 25  | 0.176   | 0.00653   | 0.149  | 0.11848  | 1 | REACTOME_G_BETA_GAMMA_SIGNALLING_THROUGH_PI3K_GAMMA                                                        |
| REACTOME_TRANSPORT_OF_... | 87  | 0.0936  | 0.00648   | 0.0861 | 0.13847  | 1 | REACTOME_TRANSPORT_OF_GLUCOSE_AND_OTHER_SUGARS_BILE_SALTS_AND_ORGANIC_ACIDS_METAL_IONS_AND_AMINE_COMPOUNDS |
| REACTOME_SPHINGOLIPID_... | 62  | -0.0288 | -0.00169  | 0.102  | 0.61133  | 1 | REACTOME_SPHINGOLIPID_METABOLISM                                                                           |
| REACTOME_PD1_SIGNALING    | 15  | 0.232   | 0.00667   | 0.206  | 0.13083  | 1 | REACTOME_PD1_SIGNALING                                                                                     |
| REACTOME_G_ALPHA_S_SIG... | 118 | -0.0788 | -0.00634  | 0.0742 | 0.85566  | 1 | REACTOME_G_ALPHA_S_SIGNALLING_EVENTS                                                                       |
| REACTOME_CELL_CELL_JUN... | 55  | -0.0821 | -0.00452  | 0.113  | 0.76656  | 1 | REACTOME_CELL_CELL_JUNCTION_ORGANIZATION                                                                   |
| REACTOME_G_ALPHA_Z_SIG... | 44  | -0.0381 | -0.00188  | 0.117  | 0.62715  | 1 | REACTOME_G_ALPHA_Z_SIGNALLING_EVENTS                                                                       |
| REACTOME_FACILITATIVE_... | 12  | -0.394  | -0.0101   | 0.245  | 0.94588  | 1 | REACTOME_FACILITATIVE_NA_INDEPENDENT_GLUCOSE_TRANSPORTERS                                                  |
| REACTOME_COSTIMULATION... | 59  | 0.00752 | 0.000429  | 0.1    | 0.47002  | 1 | REACTOME_COSTIMULATION_BY_THE_CD28_FAMILY                                                                  |



|                           |    |         |           |        |         |   |                                                                                              |
|---------------------------|----|---------|-----------|--------|---------|---|----------------------------------------------------------------------------------------------|
| REACTOME_SIGNALING_BY_... | 28 | 0.19    | 0.00749   | 0.151  | 0.10339 | 1 | REACTOME_SIGNALING_BY_ROBO_RECEPTOR                                                          |
| REACTOME_CD28_DEPENDEN... | 21 | -0.0108 | -0.000368 | 0.161  | 0.52678 | 1 | REACTOME_CD28_DEPENDENT_PI3K_AKT_SIGNALING                                                   |
| REACTOME_TIGHT_JUNCTIO... | 28 | -0.0993 | -0.00391  | 0.149  | 0.74744 | 1 | REACTOME_TIGHT_JUNCTION_INTERACTIONS                                                         |
| REACTOME_G_PROTEIN_BET... | 28 | 0.13    | 0.00512   | 0.141  | 0.17751 | 1 | REACTOME_G_PROTEIN_BETA_GAMMA_SIGNALLING                                                     |
| REACTOME_TRANSPORT_OF_... | 87 | 0.0583  | 0.00404   | 0.0826 | 0.23991 | 1 | REACTOME_TRANSPORT_OF_INORGANIC_CATIONS_ANIONS_AND_AMINO_ACIDS_OLIGOPEPTIDES                 |
| REACTOME_GOLGI_ASSOCIA... | 47 | 0.0347  | 0.00177   | 0.116  | 0.38197 | 1 | REACTOME_GOLGI_ASSOCIATED_VESICLE_BIOGENESIS                                                 |
| REACTOME_CTLA4_INHIBIT... | 21 | -0.277  | -0.00945  | 0.168  | 0.95035 | 1 | REACTOME_CTLA4_INHIBITORY_SIGNALING                                                          |
| REACTOME_FORMATION_OF_... | 27 | -0.158  | -0.0061   | 0.134  | 0.88082 | 1 | REACTOME_FORMATION_OF_TRANSCRIPTION_COUPLED_NER_TC_NER_REPAIR_COMPLEX                        |
| REACTOME_AMINO_ACID_AN... | 46 | -0.0338 | -0.0017   | 0.111  | 0.61995 | 1 | REACTOME_AMINO_ACID_AND_OLIGOPEPTIDE_SLC_TRANSPORTERS                                        |
| REACTOME_CDT1_ASSOCIAT... | 53 | 0.0645  | 0.00349   | 0.101  | 0.26202 | 1 | REACTOME_CDT1_ASSOCIATION_WITH_THE_CDC6_ORC_ORIGIN_COMPLEX                                   |
| REACTOME_BRANCHED_CHAI... | 16 | -0.138  | -0.00409  | 0.171  | 0.78984 | 1 | REACTOME_BRANCHED_CHAIN_AMINO_ACID_CATABOLISM                                                |
| REACTOME_REPAIR_SYNTHE... | 14 | -0.575  | -0.016    | 0.199  | 0.99806 | 1 | REACTOME_REPAIR_SYNTHESIS_FOR_GAP_FILLING_BY_DNA_POL_IN_TC_NER                               |
| REACTOME_RECEPTOR_LIGA... | 11 | -0.0224 | -0.000552 | 0.229  | 0.53886 | 1 | REACTOME_RECEPTOR_LIGAND_BINDING_INITIATES_THE_SECOND_PROTEOLYTIC_CLEAVAGE_OF_NOTCH_RECEPTOR |
| REACTOME_SYNTHESIS_OF_DNA | 87 | 0.00617 | 0.000427  | 0.0761 | 0.46767 | 1 | REACTOME_SYNTHESIS_OF_DNA                                                                    |
| REACTOME_NA_CL_DEPENDE... | 16 | 0.00845 | 0.000251  | 0.226  | 0.48508 | 1 | REACTOME_NA_CL_DEPENDENT_NEUROTRANSMITTER_TRANSPORTERS                                       |
| REACTOME_FORMATION_OF_... | 29 | -0.222  | -0.00888  | 0.143  | 0.93939 | 1 | REACTOME_FORMATION_OF_FIBRIN_CLOT_CLOTTING_CASCADE                                           |
| REACTOME_DEADENYLATION... | 19 | -0.0811 | -0.00263  | 0.163  | 0.69006 | 1 | REACTOME_DEADENYLATION_OF_MRNA                                                               |
| REACTOME_MRNA_DECAY_BY... | 14 | 0.105   | 0.00292   | 0.206  | 0.30505 | 1 | REACTOME_MRNA_DECAY_BY_5_TO_3_EXORIBONUCLEASE                                                |
| REACTOME_SIGNAL_AMPLIF... | 31 | 0.0796  | 0.0033    | 0.132  | 0.27316 | 1 | REACTOME_SIGNAL_AMPLIFICATION                                                                |

|                           |    |          |           |        |          |   |                                                                                         |
|---------------------------|----|----------|-----------|--------|----------|---|-----------------------------------------------------------------------------------------|
| REACTOME_ZINC_TRANSPOR... | 15 | 0.148    | 0.00426   | 0.199  | 0.22807  | 1 | REACTOME_ZINC_TRANSPORTERS                                                              |
| REACTOME_DOUBLE_STRAND... | 22 | -0.0143  | -0.000498 | 0.166  | 0.53436  | 1 | REACTOME_DOUBLE_STRAND_BREAK_REPAIR                                                     |
| REACTOME_RAS_ACTIVATIO... | 17 | 0.127    | 0.00391   | 0.199  | 0.26112  | 1 | REACTOME_RAS_ACTIVATION_UOPN_CA2_INFUX_THRO<br>UGH_NMDA_RECEPTOR                        |
| REACTOME_METAL_ION_SLC... | 21 | 0.127    | 0.00433   | 0.17   | 0.22751  | 1 | REACTOME_METAL_ION_SLC_TRANSPORTERS                                                     |
| REACTOME_AUTODEGRADATI... | 46 | 0.0375   | 0.00189   | 0.109  | 0.36512  | 1 | REACTOME_AUTODEGRADATION_OF_THE_E3_UBIQUITIN<br>_LIGASE_COP1                            |
| REACTOME_SMOOTH_MUSCLE... | 23 | 0.0484   | 0.00172   | 0.159  | 0.3807   | 1 | REACTOME_SMOOTH_MUSCLE_CONTRACTION                                                      |
| REACTOME_ACTIVATION_OF... | 34 | 0.0484   | 0.0021    | 0.14   | 0.36463  | 1 | REACTOME_ACTIVATION_OF_NMDA_RECEPTOR_UPON_<br>GLUTAMATE_BINDING_AND_POSTSYNAPTIC_EVENTS |
| REACTOME_CREB_PHOSPHOR... | 25 | -0.0187  | -0.000697 | 0.157  | 0.54738  | 1 | REACTOME_CREB_PHOSPHORYLATION_THROUGH_THE_<br>ACTIVATION_OF_RAS                         |
| REACTOME_POST_NMDA_REC... | 31 | -0.00174 | -7.20E-05 | 0.145  | 0.5048   | 1 | REACTOME_POST_NMDA_RECEPTOR_ACTIVATION_EVEN<br>TS                                       |
| REACTOME_UNBLOCKING_OF... | 14 | 0.321    | 0.00893   | 0.219  | 0.071672 | 1 | REACTOME_UNBLOCKING_OF_NMDA_RECEPTOR_GLUTA<br>MATE_BINDING_AND_ACTIVATION               |
| REACTOME_MRNA_DECAY_BY... | 10 | 0.373    | 0.00878   | 0.187  | 0.023189 | 1 | REACTOME_MRNA_DECAY_BY_3_TO_5_EXORIBONUCLEA<br>SE                                       |
| REACTOME_BILE_SALT_AND... | 11 | 0.177    | 0.00436   | 0.213  | 0.20319  | 1 | REACTOME_BILE_SALT_AND_ORGANIC_ANION_SLC_TRA<br>NSPORTERS                               |
| REACTOME_DEADENYLATION... | 43 | 0.113    | 0.00549   | 0.106  | 0.14348  | 1 | REACTOME_DEADENYLATION_DEPENDENT_MRNA_DECA<br>Y                                         |
| REACTOME_CREB_PHOSPHOR... | 15 | 0.255    | 0.00734   | 0.199  | 0.1005   | 1 | REACTOME_CREB_PHOSPHORYLATION_THROUGH_THE_<br>ACTIVATION_OF_CAMKII                      |
| REACTOME_THROMBOXANE_S... | 23 | 0.122    | 0.00435   | 0.155  | 0.21556  | 1 | REACTOME_THROMBOXANE_SIGNALLING_THROUGH_TP<br>_RECEPTOR                                 |
| REACTOME_CELL_EXTRACEL... | 12 | -0.0634  | -0.00163  | 0.221  | 0.61315  | 1 | REACTOME_CELL_EXTRACELLULAR_MATRIX_INTERACTIO<br>NS                                     |
| REACTOME_ADP_SIGNALLIN... | 21 | 0.043    | 0.00147   | 0.15   | 0.38684  | 1 | REACTOME_ADP_SIGNALLING_THROUGH_P2RY12                                                  |
| REACTOME_CELL_JUNCTION... | 74 | -0.0511  | -0.00327  | 0.0953 | 0.70415  | 1 | REACTOME_CELL_JUNCTION_ORGANIZATION                                                     |
| REACTOME_AMINE_COMPOUN... | 26 | 0.221    | 0.00838   | 0.17   | 0.096899 | 1 | REACTOME_AMINE_COMPOUND_SLC_TRANSPORTERS                                                |

|                           |     |           |           |        |          |   |                                                                                |
|---------------------------|-----|-----------|-----------|--------|----------|---|--------------------------------------------------------------------------------|
| REACTOME_PYRUVATE_META... | 16  | -0.0495   | -0.00147  | 0.184  | 0.60613  | 1 | REACTOME_PYRUVATE_METABOLISM                                                   |
| REACTOME_PURINE_CATABO... | 10  | -0.1      | -0.00235  | 0.243  | 0.65955  | 1 | REACTOME_PURINE_CATABOLISM                                                     |
| REACTOME_GLUCOSE_TRANS... | 38  | 0.00423   | 0.000194  | 0.119  | 0.4858   | 1 | REACTOME_GLUCOSE_TRANSPORT                                                     |
| REACTOME_FRS2_MEDIATED... | 36  | -0.271    | -0.0121   | 0.127  | 0.98395  | 1 | REACTOME_FRS2_MEDIATED_CASCADE                                                 |
| REACTOME_METABOLISM_OF... | 243 | 0.0879    | 0.0101    | 0.0463 | 0.028707 | 1 | REACTOME_METABOLISM_OF_RNA                                                     |
| REACTOME_MITOTIC_G1_G1... | 125 | 0.0698    | 0.00579   | 0.0662 | 0.14572  | 1 | REACTOME_MITOTIC_G1_G1_S_PHASES                                                |
| REACTOME_PI_3K_CASCADE    | 53  | 0.0137    | 0.000741  | 0.103  | 0.44721  | 1 | REACTOME_PI_3K_CASCADE                                                         |
| REACTOME_DOWNSTREAM_SI... | 96  | -0.000578 | -4.20E-05 | 0.0773 | 0.50298  | 1 | REACTOME_DOWNSTREAM_SIGNALING_OF_ACTIVATED_FGFR                                |
| REACTOME_REGULATION_OF... | 75  | 0.181     | 0.0117    | 0.0857 | 0.01722  | 1 | REACTOME_REGULATION_OF_MITOTIC_CELL_CYCLE                                      |
| REACTOME_TAK1_ACTIVATE... | 20  | 0.17      | 0.00565   | 0.157  | 0.13922  | 1 | REACTOME_TAK1_ACTIVATES_NFKB_BY_PHOSPHORYLATION_AND_ACTIVATION_OF_IKKS_COMPLEX |
| REACTOME_REGULATION_OF... | 14  | -0.158    | -0.00441  | 0.207  | 0.77775  | 1 | REACTOME_REGULATION_OF_AMPK_ACTIVITY_VIA_LKB1                                  |
| REACTOME_MITOTIC_M_M_G... | 160 | 0.000414  | 3.88E-05  | 0.0578 | 0.49714  | 1 | REACTOME_MITOTIC_M_M_G1_PHASES                                                 |
| REACTOME_MYOGENESIS       | 27  | 0.112     | 0.00431   | 0.165  | 0.24906  | 1 | REACTOME_MYOGENESIS                                                            |
| REACTOME_MAP_KINASE_AC... | 44  | -0.0958   | -0.00472  | 0.112  | 0.80301  | 1 | REACTOME_MAP_KINASE_ACTIVATION_IN_TLR_CASCADE                                  |
| REACTOME_PHOSPHOLIPASE... | 53  | 0.00558   | 0.000302  | 0.112  | 0.48013  | 1 | REACTOME_PHOSPHOLIPASE_C_MEDIATED_CASCADE                                      |
| REACTOME_ACTIVATION_OF... | 30  | 0.0983    | 0.004     | 0.137  | 0.236    | 1 | REACTOME_ACTIVATION_OF_KAINATE_RECEPTORS_UPON_N_GLUTAMATE_BINDING              |
| REACTOME_IONOTROPIC_AC... | 10  | 0.324     | 0.00761   | 0.262  | 0.10797  | 1 | REACTOME_IONOTROPIC_ACTIVITY_OF_KAINATE_RECEPTORS                              |
| REACTOME_ACTIVATION_OF... | 10  | -0.0726   | -0.00171  | 0.255  | 0.61198  | 1 | REACTOME_ACTIVATION_OF_THE_AP1_FAMILY_OF_TRANSCRIPTION_FACTORS                 |
| REACTOME_MAPK_TARGETS_... | 28  | -0.0656   | -0.00258  | 0.144  | 0.67605  | 1 | REACTOME_MAPK_TARGETS_NUCLEAR_EVENTS_MEDIATED_BY_MAP_KINASES                   |
| REACTOME_SYNTHESIS_AND... | 18  | -0.146    | -0.0046   | 0.19   | 0.77842  | 1 | REACTOME_SYNTHESIS_AND_INTERCONVERSION_OF_NUCLEOTIDE_DI_AND_TRIPHOSPHATES      |
| REACTOME_GPCR_LIGAND_B... | 374 | 0.00873   | 0.00124   | 0.0431 | 0.41981  | 1 | REACTOME_GPCR_LIGAND_BINDING                                                   |
| REACTOME_RNA_POL_I_RNA... | 99  | -0.0762   | -0.00563  | 0.0758 | 0.84273  | 1 | REACTOME_RNA_POL_I_RNA_POL_III_AND_MITOCHONDRIAL_TRANSCRIPTION                 |

|                           |     |          |           |        |          |   |                                                                                                      |
|---------------------------|-----|----------|-----------|--------|----------|---|------------------------------------------------------------------------------------------------------|
| REACTOME_JNK_C_JUN_KIN... | 13  | 0.135    | 0.00361   | 0.205  | 0.2552   | 1 | REACTOME_JNK_C_JUN_KINASES_PHOSPHORYLATION_A<br>ND_ACTIVATION_MEDIATED_BY_ACTIVATED_HUMAN_TA<br>K1   |
| REACTOME_SHC_MEDIATED_... | 28  | -0.19    | -0.00748  | 0.138  | 0.91589  | 1 | REACTOME_SHC_MEDIATED_CASCADE                                                                        |
| REACTOME_THROMBIN_SIGN... | 32  | 0.142    | 0.00598   | 0.131  | 0.13833  | 1 | REACTOME_THROMBIN_SIGNALING_THROUGH_PROTEI<br>NASE_ACTIVATED_RECEPTORS_PARS                          |
| REACTOME_ENERGY_DEPEND... | 17  | -0.0871  | -0.00267  | 0.19   | 0.67691  | 1 | REACTOME_ENERGY_DEPENDENT_REGULATION_OF_MT<br>OR_BY_LKB1_AMPK                                        |
| REACTOME_MITOTIC_G2_G2... | 76  | 0.107    | 0.00694   | 0.0891 | 0.11438  | 1 | REACTOME_MITOTIC_G2_G2_M_PHASES                                                                      |
| REACTOME_REGULATION_OF... | 10  | -0.048   | -0.00113  | 0.226  | 0.58409  | 1 | REACTOME_REGULATION_OF_RHEB_GTPASE_ACTIVITY_B<br>Y_AMPK                                              |
| REACTOME_ACTIVATED_TAK... | 14  | -0.179   | -0.00499  | 0.189  | 0.82912  | 1 | REACTOME_ACTIVATED_TAK1_MEDIATES_P38_MAPK_AC<br>TIVATION                                             |
| REACTOME_DNA_REPAIR       | 102 | -0.0381  | -0.00286  | 0.0722 | 0.70131  | 1 | REACTOME_DNA_REPAIR                                                                                  |
| REACTOME_EFFECTS_OF_PI... | 22  | -0.00235 | -8.20E-05 | 0.175  | 0.50535  | 1 | REACTOME_EFFECTS_OF_PIP2_HYDROLYSIS                                                                  |
| REACTOME_RNA_POL_II_PR... | 56  | -0.0692  | -0.00385  | 0.0947 | 0.76749  | 1 | REACTOME_RNA_POL_II_PRE_TRANSCRIPTION_EVENTS                                                         |
| REACTOME_ROLE_OF_DCC_I... | 9   | 0.0464   | 0.00104   | 0.322  | 0.44264  | 1 | REACTOME_ROLE_OF_DCC_IN_REGULATING_APOPTOSIS<br>REACTOME_POST_TRANSLATIONAL_PROTEIN_MODIFICA<br>TION |
| REACTOME_POST_TRANSLAT... | 170 | -0.0244  | -0.00236  | 0.0558 | 0.6691   | 1 |                                                                                                      |
| REACTOME_CHROMOSOME_MA... | 99  | -0.0451  | -0.00333  | 0.0728 | 0.73214  | 1 | REACTOME_CHROMOSOME_MAINTENANCE                                                                      |
| REACTOME_DEPOSITION_OF... | 48  | 0.0242   | 0.00124   | 0.11   | 0.41293  | 1 | REACTOME_DEPOSITION_OF_NEW_CENPA_CONTAINING<br>_NUCLEOSOMES_AT_THE_CENTROMERE                        |
| REACTOME_L1CAM_INTERAC... | 76  | 0.0398   | 0.00258   | 0.0894 | 0.32817  | 1 | REACTOME_L1CAM_INTERACTIONS                                                                          |
| REACTOME_ROLE_OF_SECON... | 8   | 0.342    | 0.00719   | 0.246  | 0.082738 | 1 | REACTOME_ROLE_OF_SECOND_MESSENGERS_IN_NETRIN<br>1_SIGNALING                                          |
| REACTOME_SIGNALING_BY_ILS | 100 | 0.021    | 0.00156   | 0.0771 | 0.39263  | 1 | REACTOME_SIGNALING_BY_ILS                                                                            |
| REACTOME_NETRIN1_SIGNA... | 37  | 0.185    | 0.00835   | 0.129  | 0.07546  | 1 | REACTOME_NETRIN1_SIGNALING                                                                           |
| REACTOME_METABOLISM_OF... | 453 | 0.00849  | 0.00133   | 0.0361 | 0.40705  | 1 | REACTOME_METABOLISM_OF_LIPIDS_AND_LIPOPROTEIN<br>S                                                   |

|                           |     |          |           |        |          |   |                                                                                                                             |
|---------------------------|-----|----------|-----------|--------|----------|---|-----------------------------------------------------------------------------------------------------------------------------|
| REACTOME_INTERACTION_B... | 20  | -0.291   | -0.00966  | 0.184  | 0.94299  | 1 | REACTOME_INTERACTION_BETWEEN_L1_AND_ANKYRINS                                                                                |
| REACTOME_SIGNAL_TRANSD... | 31  | 0.066    | 0.00273   | 0.137  | 0.31454  | 1 | REACTOME_SIGNAL_TRANSDUCTION_BY_L1                                                                                          |
| REACTOME_FATTY_ACID_TR... | 163 | 0.0555   | 0.00525   | 0.0585 | 0.17138  | 1 | REACTOME_FATTY_ACID_TRIACYLGLYCEROL_AND_KETONE_BODY_METABOLISM                                                              |
| REACTOME_TRANSPORT_OF_... | 30  | -0.157   | -0.00639  | 0.135  | 0.87707  | 1 | REACTOME_TRANSPORT_OF_VITAMINS_NUCLEOSIDES_AND_RELATED_MOLECULES                                                            |
| REACTOME_HIGHLY_CALCIU... | 11  | 0.0191   | 0.000471  | 0.28   | 0.4728   | 1 | REACTOME_HIGHLY_CALCIIUM_PERMEABLE_POSTSYNAPTIC_NICOTINIC_ACETYLCHOLINE_RECEPTORS                                           |
| REACTOME_RNA_POL_I_PRO... | 43  | 0.0487   | 0.00237   | 0.131  | 0.35478  | 1 | REACTOME_RNA_POL_I_PROMOTER_OPENING                                                                                         |
| REACTOME_PRESYNAPTIC_N... | 12  | 0.522    | 0.0135    | 0.279  | 0.030854 | 1 | REACTOME_PRESYNAPTIC_NICOTINIC_ACETYLCHOLINE_RECEPTORS                                                                      |
| REACTOME_ORGANIC_CATIO... | 13  | 0.225    | 0.00605   | 0.218  | 0.15076  | 1 | REACTOME_ORGANIC_CATION_ANION_ZWITTERION_TRANSPORT                                                                          |
| REACTOME_DCC_MEDIATED_... | 13  | -0.00694 | -0.000186 | 0.218  | 0.51267  | 1 | REACTOME_DCC_MEDIATED_ATTRACTIVE_SIGNALING                                                                                  |
| REACTOME_RECYCLING_PAT... | 22  | 0.0719   | 0.00251   | 0.163  | 0.32922  | 1 | REACTOME_RECYCLING_PATHWAY_OF_L1                                                                                            |
| REACTOME_SYNTHESIS_OF_... | 12  | -0.144   | -0.00372  | 0.202  | 0.76251  | 1 | REACTOME_SYNTHESIS_OF_SUBSTRATES_IN_N_GLYCAN_BIOSYTHESIS                                                                    |
| REACTOME_RESPIRATORY_E... | 62  | -0.00813 | -0.000475 | 0.0889 | 0.53644  | 1 | REACTOME_RESPIRATORY_ELECTRON_TRANSPORT                                                                                     |
| REACTOME_ASPARAGINE_N_... | 77  | -0.0316  | -0.00206  | 0.0853 | 0.64463  | 1 | REACTOME_ASPARAGINE_N_LINKED_GLYCOSYLATION                                                                                  |
| REACTOME_ASSEMBLY_OF_T... | 62  | 0.078    | 0.00456   | 0.0924 | 0.19924  | 1 | REACTOME_ASSEMBLY_OF_THE_PRE_REPLICATIVE_COMPLEX                                                                            |
| REACTOME_BIOSYNTHESIS_... | 25  | -0.00993 | -0.000369 | 0.151  | 0.52628  | 1 | REACTOME_BIOSYNTHESIS_OF_THE_N_GLYCAN_PRECURSOR_DOLICHOL_LIPID_LINKED_OLIGOSACCHARIDE_LLO_AND_TRANSFER_TO_A_NASCENT_PROTEIN |
| REACTOME_IL1_SIGNALING    | 36  | 0.19     | 0.00848   | 0.125  | 0.064241 | 1 | REACTOME_IL1_SIGNALING                                                                                                      |
| REACTOME_GLOBAL_GENOMI... | 31  | -0.4     | -0.0166   | 0.127  | 0.99921  | 1 | REACTOME_GLOBAL_GENOMIC_NER_GG_NER                                                                                          |
| REACTOME_CGMP_EFFECTS     | 19  | -0.0957  | -0.0031   | 0.186  | 0.69623  | 1 | REACTOME_CGMP_EFFECTS                                                                                                       |
| REACTOME_REGULATION_OF... | 18  | -0.357   | -0.0113   | 0.203  | 0.96066  | 1 | REACTOME_REGULATION_OF_SIGNALING_BY_CBL                                                                                     |

|                           |    |          |          |        |         |   |                                                |
|---------------------------|----|----------|----------|--------|---------|---|------------------------------------------------|
| REACTOME_AMINO_ACID_SY... | 15 | 0.0439   | 0.00126  | 0.198  | 0.41215 | 1 | REACTOME_AMINO_ACID_SYNTHESIS_AND_INTERCONVE   |
| REACTOME_CALNEXIN_CALR... | 11 | 0.0646   | 0.00159  | 0.214  | 0.38127 | 1 | RSION_TRANSAMINATION                           |
| REACTOME_SYNTHESIS_SEC... | 12 | -0.344   | -0.00886 | 0.206  | 0.95261 | 1 | REACTOME_CALNEXIN_CALRETICULIN_CYCLE           |
| REACTOME_PASSIVE_TRANS... | 11 | -0.131   | -0.00322 | 0.266  | 0.68852 | 1 | REACTOME_SYNTHESIS_SECRETION_AND_INACTIVATION  |
| REACTOME_NEPHRIN_INTER... | 19 | -0.244   | -0.00791 | 0.175  | 0.91873 | 1 | _OF_GIP                                        |
| REACTOME_IL_3_5_AND_GM... | 40 | -0.0616  | -0.0029  | 0.127  | 0.68589 | 1 | REACTOME_PASSIVE_TRANSPORT_BY_AQUAPORINS       |
| REACTOME_NITRIC_OXIDE_... | 25 | -0.101   | -0.00376 | 0.169  | 0.72555 | 1 | REACTOME_NEPHRIN_INTERACTIONS                  |
| REACTOME_PLATELET_HOME... | 75 | -0.0259  | -0.00167 | 0.0921 | 0.61099 | 1 | REACTOME_IL_3_5_AND_GM_CSF_SIGNALING           |
| REACTOME_N_GLYCAN_TRIM... | 13 | 0.109    | 0.00293  | 0.185  | 0.27733 | 1 | REACTOME_NITRIC_OXIDE_STIMULATES_GUANYLATE_CY  |
| REACTOME_PLATELET_SENS... | 16 | 0.0173   | 0.000515 | 0.191  | 0.46397 | 1 | CLASE                                          |
| REACTOME_AQUAPORIN_MED... | 49 | -0.0204  | -0.00106 | 0.116  | 0.56968 | 1 | REACTOME_PLATELET_HOMEOSTASIS                  |
| REACTOME_IL_RECEPTOR_S... | 24 | 0.022    | 0.000801 | 0.154  | 0.44311 | 1 | REACTOME_N_GLYCAN_TRIMMING_IN_THE_ER_AND_CA    |
| REACTOME_RAP1_SIGNALLING  | 16 | 0.0352   | 0.00105  | 0.201  | 0.43057 | 1 | LNEXIN_CALRETICULIN_CYCLE                      |
| REACTOME_PLATELET_CALC... | 15 | -0.0404  | -0.00116 | 0.219  | 0.57314 | 1 | REACTOME_PLATELET_SENSITIZATION_BY_LDL         |
| REACTOME_SIGNAL_REGULA... | 12 | -0.209   | -0.00537 | 0.234  | 0.81353 | 1 | REACTOME_AQUAPORIN_MEDIATED_TRANSPORT          |
| REACTOME_PROSTACYCLIN_... | 19 | 0.0246   | 0.000796 | 0.169  | 0.44211 | 1 | REACTOME_IL_RECEPTOR_SHC_SIGNALING             |
| REACTOME_GABA_SYNTHESI... | 17 | 0.134    | 0.00412  | 0.199  | 0.24988 | 1 | REACTOME_RAP1_SIGNALLING                       |
| REACTOME_INCRETIN_SYNT... | 20 | -0.177   | -0.00588 | 0.164  | 0.85912 | 1 | REACTOME_PLATELET_CALCIIUM_HOMEOSTASIS         |
| REACTOME_TRANSPORT_OF_... | 11 | -0.324   | -0.008   | 0.24   | 0.91218 | 1 | REACTOME_SIGNAL_REGULATORY_PROTEIN_SIRP_FAMIL  |
| REACTOME_SYNTHESIS_SEC... | 17 | 0.0232   | 0.000711 | 0.183  | 0.44967 | 1 | Y_INTERACTIONS                                 |
| REACTOME_REGULATION_OF... | 42 | 0.000911 | 4.39E-05 | 0.124  | 0.49706 | 1 | REACTOME_PROSTACYCLIN_SIGNALLING_THROUGH_PRO   |
| REACTOME_DESTABILIZATI... | 16 | 0.238    | 0.00708  | 0.162  | 0.07105 | 1 | STACYCLIN_RECEPTOR                             |
|                           |    |          |          |        |         |   | REACTOME_GABA_SYNTHESIS_RELEASE_REUPTAKE_AND   |
|                           |    |          |          |        |         |   | _DEGRADATION                                   |
|                           |    |          |          |        |         |   | REACTOME_INCRETIN_SYNTHESIS_SECRETION_AND_INAC |
|                           |    |          |          |        |         |   | TIVATION                                       |
|                           |    |          |          |        |         |   | REACTOME_TRANSPORT_OF_ORGANIC_ANIONS           |
|                           |    |          |          |        |         |   | REACTOME_SYNTHESIS_SECRETION_AND_INACTIVATION  |
|                           |    |          |          |        |         |   | _OF_GLP1                                       |
|                           |    |          |          |        |         |   | REACTOME_REGULATION_OF_WATER_BALANCE_BY_REN    |
|                           |    |          |          |        |         |   | AL_AQUAPORINS                                  |
|                           |    |          |          |        |         |   | REACTOME_DESTABILIZATION_OF_MRNA_BY_BRF1       |

|                           |     |         |          |        |          |   |                                                                                       |
|---------------------------|-----|---------|----------|--------|----------|---|---------------------------------------------------------------------------------------|
| REACTOME_IRAK1_RECRUIT... | 8   | 0.47    | 0.0099   | 0.239  | 0.024347 | 1 | REACTOME_IRAK1_RECRUITS_IKK_COMPLEX                                                   |
| REACTOME_TRAF6_MEDIATE... | 28  | -0.0829 | -0.00326 | 0.158  | 0.69997  | 1 | REACTOME_TRAF6_MEDIATED_IRF7_ACTIVATION                                               |
| REACTOME_CIRCADIAN_CLOCK  | 51  | -0.0511 | -0.00271 | 0.104  | 0.68868  | 1 | REACTOME_CIRCADIAN_CLOCK                                                              |
| REACTOME_TRAF6_MEDIATE... | 20  | -0.0625 | -0.00208 | 0.156  | 0.65537  | 1 | REACTOME_TRAF6_MEDIATED_NFKB_ACTIVATION                                               |
| REACTOME_FACTORS_INVOL... | 118 | 0.0162  | 0.00131  | 0.0735 | 0.41264  | 1 | REACTOME_FACTORS_INVOLVED_IN_MEGAKARYOCYTE_DEVELOPMENT_AND_PLATELET_PRODUCTION        |
| REACTOME_REGULATION_OF... | 13  | 0.17    | 0.00455  | 0.194  | 0.19069  | 1 | REACTOME_REGULATION_OF_IFNG_SIGNALING                                                 |
| REACTOME_GABA_A_RECEPT... | 10  | -0.0822 | -0.00193 | 0.303  | 0.60678  | 1 | REACTOME_GABA_A_RECEPTOR_ACTIVATION                                                   |
| REACTOME_INHIBITION_OF... | 25  | -0.121  | -0.0045  | 0.158  | 0.77879  | 1 | REACTOME_INHIBITION_OF_VOLTAGE_GATED_CA2_CHANNELS_VIA_GBETA_GAMMA_SUBUNITS            |
| REACTOME_IRAK2_MEDIATE... | 7   | 0.46    | 0.00905  | 0.277  | 0.048297 | 1 | REACTOME_IRAK2_MEDIATED_ACTIVATION_OF_TAK1_COMPLEX_UPON_TLR7_8_OR_9_STIMULATION       |
| REACTOME_TRAF6_MEDIATE... | 68  | -0.031  | -0.0019  | 0.0864 | 0.63998  | 1 | REACTOME_TRAF6_MEDIATED_INDUCTION_OF_NFKB_AND_MAP_KINASES_UPON_TLR7_8_OR_9_ACTIVATION |
| REACTOME_TRAF3_DEPENDE... | 14  | -0.1    | -0.00278 | 0.182  | 0.70838  | 1 | REACTOME_TRAF3_DEPENDENT_IRF_ACTIVATION_PATHWAY                                       |
| REACTOME_GABA_B_RECEPT... | 38  | -0.117  | -0.00537 | 0.127  | 0.82279  | 1 | REACTOME_GABA_B_RECEPTOR_ACTIVATION                                                   |
| REACTOME_NFKB_ACTIVATI... | 11  | 0.114   | 0.00281  | 0.206  | 0.29051  | 1 | REACTOME_NFKB_ACTIVATION_THROUGH_FADD_RIP1_PATHWAY_MEDIATED_BY_CASPASE_8_AND10        |
| REACTOME_DESTABILIZATI... | 16  | 0.336   | 0.00999  | 0.164  | 0.020369 | 1 | REACTOME_DESTABILIZATION_OF_MRNA_BY_KSRP                                              |
| REACTOME_TRANSPORT_TO_... | 33  | -0.0768 | -0.00328 | 0.14   | 0.70828  | 1 | REACTOME_TRANSPORT_TO_THE_GOLGI_AND_SUBSEQUENT_MODIFICATION                           |
| REACTOME_IRON_UPTAKE_A... | 34  | 0.244   | 0.0106   | 0.139  | 0.039744 | 1 | REACTOME_IRON_UPTAKE_AND_TRANSPORT                                                    |
| REACTOME_DESTABILIZATI... | 16  | 0.301   | 0.00894  | 0.162  | 0.031923 | 1 | REACTOME_DESTABILIZATION_OF_MRNA_BY_TRISTETRAPROLIN_TTP                               |
| REACTOME_INTERFERON_GA... | 55  | 0.122   | 0.00673  | 0.11   | 0.1328   | 1 | REACTOME_INTERFERON_GAMMA_SIGNALING                                                   |
| REACTOME_N_GLYCAN_ANTE... | 14  | -0.293  | -0.00814 | 0.227  | 0.90168  | 1 | REACTOME_N_GLYCAN_ANTENNAE_ELONGATION                                                 |
| REACTOME_TRAF6_MEDIATE... | 7   | -0.214  | -0.00421 | 0.219  | 0.8351   | 1 | REACTOME_TRAF6_MEDIATED_IRF7_ACTIVATION_IN_TLR7_8_OR_9_SIGNALING                      |
| REACTOME_ACTIVATION_OF... | 13  | 0.173   | 0.00463  | 0.217  | 0.21344  | 1 | REACTOME_ACTIVATION_OF_IRF3_IRF7_MEDIATED_BY_TBK1_IKK_EPSILON                         |

|                           |     |         |          |        |          |   |                                                                                |
|---------------------------|-----|---------|----------|--------|----------|---|--------------------------------------------------------------------------------|
| REACTOME_ION_TRANSPORT... | 30  | -0.0362 | -0.00147 | 0.156  | 0.59153  | 1 | REACTOME_ION_TRANSPORT_BY_P_TYPE_ATPASES                                       |
| REACTOME_INTERFERON_AL... | 60  | 0.136   | 0.00783  | 0.112  | 0.11131  | 1 | REACTOME_INTERFERON_ALPHA_BETA_SIGNALING                                       |
| REACTOME_ADVANCED_GLYC... | 13  | -0.142  | -0.00381 | 0.197  | 0.76492  | 1 | REACTOME_ADVANCED_GLYCOSYLATION_ENDPRODUCT_RECEPTOR_SIGNALING                  |
| REACTOME_GABA_RECEPTOR... | 50  | -0.113  | -0.00594 | 0.115  | 0.83689  | 1 | REACTOME_GABA_RECEPTOR_ACTIVATION                                              |
| REACTOME_KINESINS         | 23  | -0.0694 | -0.00247 | 0.156  | 0.67147  | 1 | REACTOME_KINESINS                                                              |
| REACTOME_N_GLYCAN_ANTE... | 18  | -0.23   | -0.00726 | 0.199  | 0.87612  | 1 | REACTOME_N_GLYCAN_ANTENNAE_ELONGATION_IN_THE_MEDIAL_TRANS_GOLGI                |
| REACTOME_REGULATION_OF... | 22  | 0.0983  | 0.00343  | 0.219  | 0.32692  | 1 | REACTOME_REGULATION_OF_IFNA_SIGNALING                                          |
| REACTOME_INTERFERON_SI... | 147 | 0.0629  | 0.00565  | 0.0647 | 0.16558  | 1 | REACTOME_INTERFERON_SIGNALING                                                  |
| REACTOME_NEGATIVE_REGU... | 29  | 0.107   | 0.00426  | 0.139  | 0.22095  | 1 | REACTOME_NEGATIVE_REGULATORS_OF_RIG_I_MDA5_SIGNALING                           |
| REACTOME_NFKB_AND_MAP_... | 65  | -0.0324 | -0.00194 | 0.0924 | 0.63719  | 1 | REACTOME_NFKB_AND_MAP_KINASES_ACTIVATION_MEDIATED_BY_TLR4_SIGNALING_REPERTOIRE |
| REACTOME_TRANSFERRIN_E... | 24  | 0.151   | 0.00548  | 0.159  | 0.17184  | 1 | REACTOME_TRANSFERRIN_ENDOCYTOSIS_AND_RECYCLING                                 |
| REACTOME_DSCAM_INTERAC... | 11  | 0.0166  | 0.000409 | 0.242  | 0.47264  | 1 | REACTOME_DSCAM_INTERACTIONS                                                    |
| REACTOME_ION_CHANNEL_T... | 48  | -0.0903 | -0.00465 | 0.124  | 0.76619  | 1 | REACTOME_ION_CHANNEL_TRANSPORT                                                 |
| REACTOME_DESTABILIZATI... | 49  | 0.13    | 0.00677  | 0.106  | 0.10973  | 1 | REACTOME_DESTABILIZATION_OF_MRNA_BY_AUF1_HNRNP_D0                              |
| REACTOME_TRAF6_MEDIATE... | 12  | 0.158   | 0.00407  | 0.221  | 0.23739  | 1 | REACTOME_TRAF6_MEDIATED_INDUCTION_OF_TAK1_COMPLEX                              |
| REACTOME_RIG_I_MDA5_ME... | 68  | 0.134   | 0.00823  | 0.0959 | 0.08038  | 1 | REACTOME_RIG_I_MDA5_MEDIATED_INDUCTION_OF_IFN_ALPHA_BETA_PATHWAYS              |
| REACTOME_IKK_COMPLEX_R... | 9   | 0.347   | 0.00775  | 0.253  | 0.084767 | 1 | REACTOME_IKK_COMPLEX_RECRUITMENT_MEDIATED_BY_RIP1                              |
| REACTOME_LIGAND_GATED_... | 18  | -0.181  | -0.0057  | 0.204  | 0.81284  | 1 | REACTOME_LIGAND_GATED_ION_CHANNEL_TRANSPORT                                    |
| REACTOME_FORMATION_OF_... | 19  | -0.341  | -0.011   | 0.159  | 0.98386  | 1 | REACTOME_FORMATION_OF_INCISION_COMPLEX_IN_GG_NER                               |
| REACTOME_TRANSCRIPTION... | 67  | 0.017   | 0.00103  | 0.087  | 0.42257  | 1 | REACTOME_TRANSCRIPTIONAL_REGULATION_OF_WHITE_ADIPOCYTE_DIFFERENTIATION         |



|                           |     |          |           |        |          |   |                                                 |
|---------------------------|-----|----------|-----------|--------|----------|---|-------------------------------------------------|
| REACTOME_ENDOSOMAL_SOR... | 26  | -0.014   | -0.00053  | 0.139  | 0.54003  | 1 | REACTOME_ENDOSOMAL_SORTING_COMPLEX_REQUIRE      |
| REACTOME_MEIOTIC_RECOM... | 66  | 0.128    | 0.00774   | 0.101  | 0.10263  | 1 | D_FOR_TRANSPORT_ESCRT                           |
| REACTOME_IL_2_SIGNALING   | 38  | -0.0785  | -0.00359  | 0.122  | 0.73983  | 1 | REACTOME_MEIOTIC_RECOMBINATION                  |
| REACTOME_IL_6_SIGNALING   | 10  | -0.027   | -0.000636 | 0.268  | 0.54012  | 1 | REACTOME_IL_2_SIGNALING                         |
|                           |     |          |           |        |          |   | REACTOME_IL_6_SIGNALING                         |
|                           |     |          |           |        |          |   | REACTOME_PLATELET_AGGREGATION_PLUG_FORMATIO     |
| REACTOME_PLATELET_AGGR... | 35  | 0.00744  | 0.000327  | 0.118  | 0.47479  | 1 | N                                               |
| REACTOME_SIGNALING_BY_... | 96  | -0.00886 | -0.000644 | 0.0786 | 0.54487  | 1 | REACTOME_SIGNALING_BY_NOTCH                     |
| REACTOME_LAGGING_STRAN... | 17  | -0.29    | -0.0089   | 0.156  | 0.96867  | 1 | REACTOME_LAGGING_STRAND_SYNTHESIS               |
| REACTOME_INTRINSIC_PAT... | 14  | -0.0892  | -0.00248  | 0.192  | 0.67906  | 1 | REACTOME_INTRINSIC_PATHWAY                      |
|                           |     |          |           |        |          |   | REACTOME_INHIBITION_OF_REPLICATION_INITIATION_O |
| REACTOME_INHIBITION_OF... | 9   | -0.105   | -0.00234  | 0.211  | 0.69011  | 1 | F_DAMAGED_DNA_BY_RB1_E2F1                       |
| REACTOME_ETHANOL_OXIDA... | 10  | -0.259   | -0.0061   | 0.315  | 0.79524  | 1 | REACTOME_ETHANOL_OXIDATION                      |
|                           |     |          |           |        |          |   | REACTOME_SYNTHESIS_OF_VERY_LONG_CHAIN_FATTY_A   |
| REACTOME_SYNTHESIS_OF_... | 13  | 0.362    | 0.0097    | 0.202  | 0.036719 | 1 | CYL_COAS                                        |
| REACTOME_DNA_REPLICATION  | 180 | -0.0174  | -0.00172  | 0.0545 | 0.62504  | 1 | REACTOME_DNA_REPLICATION                        |
|                           |     |          |           |        |          |   | REACTOME_CLEAVAGE_OF_GROWING_TRANSCRIPT_IN_T    |
| REACTOME_CLEAVAGE_OF_G... | 40  | 0.0738   | 0.00347   | 0.109  | 0.24916  | 1 | HE_TERMINATION_REGION_                          |
| REACTOME_PKB_MEDIATED_... | 28  | 0.0629   | 0.00247   | 0.135  | 0.32024  | 1 | REACTOME_PKB_MEDIATED_EVENTS                    |
|                           |     |          |           |        |          |   | REACTOME_E2F_MEDIATED_REGULATION_OF_DNA_REP     |
| REACTOME_E2F_MEDIATED_... | 30  | 0.129    | 0.00526   | 0.126  | 0.15288  | 1 | LICATION                                        |
| REACTOME_METABOLISM_OF... | 222 | -0.0213  | -0.00234  | 0.0508 | 0.66242  | 1 | REACTOME_METABOLISM_OF_CARBOHYDRATES            |
|                           |     |          |           |        |          |   | REACTOME_HORMONE_SENSITIVE_LIPASE_HSL_MEDIATE   |
| REACTOME_HORMONE_SENSI... | 12  | -0.176   | -0.00453  | 0.191  | 0.82077  | 1 | D_TRIACYLGLYCEROL_HYDROLYSIS                    |
| REACTOME_SIGNALING_BY_... | 104 | -0.0851  | -0.00644  | 0.0739 | 0.87527  | 1 | REACTOME_SIGNALING_BY_INSULIN_RECEPTOR          |
| REACTOME_SIGNAL_ATTENU... | 13  | -0.0576  | -0.00154  | 0.204  | 0.61109  | 1 | REACTOME_SIGNAL_ATTENUATION                     |
| REACTOME_PURINE_METABO... | 32  | 0.035    | 0.00147   | 0.131  | 0.39465  | 1 | REACTOME_PURINE_METABOLISM                      |
| REACTOME_SOS_MEDIATED_... | 14  | -0.456   | -0.0127   | 0.192  | 0.99126  | 1 | REACTOME_SOS_MEDIATED_SIGNALLING                |
|                           |     |          |           |        |          |   | REACTOME_RNA_POL_III_TRANSCRIPTION_INITIATION_F |
| REACTOME_RNA_POL_III_T... | 26  | -0.203   | -0.0077   | 0.139  | 0.92742  | 1 | ROM_TYPE_3_PROMOTER                             |
| REACTOME_APOPTOSIS        | 136 | -0.0303  | -0.00262  | 0.0653 | 0.67857  | 1 | REACTOME_APOPTOSIS                              |
|                           |     |          |           |        |          |   | REACTOME_LIPID_DIGESTION_MOBILIZATION_AND_TRA   |
| REACTOME_LIPID_DIGESTI... | 45  | -0.0247  | -0.00123  | 0.11   | 0.58915  | 1 | NSPORT                                          |

|                           |     |          |           |        |          |   |                                                                                                                           |
|---------------------------|-----|----------|-----------|--------|----------|---|---------------------------------------------------------------------------------------------------------------------------|
| REACTOME_HEMOSTASIS       | 429 | -0.00804 | -0.00122  | 0.0379 | 0.58404  | 1 | REACTOME_HEMOSTASIS                                                                                                       |
| REACTOME_INFLUENZA_LIF... | 129 | 0.0632   | 0.00532   | 0.062  | 0.15422  | 1 | REACTOME_INFLUENZA_LIFE_CYCLE                                                                                             |
| REACTOME_INFLUENZA_VIR... | 95  | 0.096    | 0.00694   | 0.0708 | 0.087417 | 1 | REACTOME_INFLUENZA_VIRAL_RNA_TRANSCRIPTION_AND_REPLICATION                                                                |
| REACTOME_NEP_NS2_INTER... | 27  | -0.12    | -0.00462  | 0.143  | 0.79827  | 1 | REACTOME_NEP_NS2_INTERACTS_WITH_THE_CELLULAR_EXPORT_MACHINERY                                                             |
| REACTOME_HIV_INFECTI...   | 186 | -0.00903 | -0.000911 | 0.0538 | 0.56664  | 1 | REACTOME_HIV_INFECTI...                                                                                                   |
| REACTOME_TRANSPORT_OF_... | 27  | -0.1     | -0.00387  | 0.145  | 0.7553   | 1 | REACTOME_TRANSPORT_OF_RIBONUCLEOPROTEINS INTO_THE_HOST_NUCLEUS                                                            |
| REACTOME_HIV_LIFE_CYCLE   | 111 | 0.00638  | 0.000499  | 0.0683 | 0.46275  | 1 | REACTOME_HIV_LIFE_CYCLE                                                                                                   |
| REACTOME_ABORTIVE_ELON... | 23  | 0.0459   | 0.00164   | 0.14   | 0.37156  | 1 | REACTOME_ABORTIVE_ELONGATION_OF_HIV1_TRANSCRIPTION_IN_THE_ABSENCE_OF_TAT                                                  |
| REACTOME_EARLY_PHASE_O... | 13  | 0.151    | 0.00404   | 0.196  | 0.22117  | 1 | REACTOME_EARLY_PHASE_OF_HIV_LIFE_CYCLE                                                                                    |
| REACTOME_HOST_INTERACT... | 116 | -0.0197  | -0.00157  | 0.0691 | 0.61204  | 1 | REACTOME_HOST_INTERACTIONS_OF_HIV_FACTORS                                                                                 |
| REACTOME_RNA_POL_III_T... | 19  | -0.188   | -0.00608  | 0.161  | 0.87787  | 1 | REACTOME_RNA_POL_III_TRANSCRIPTION_TERMINATION                                                                            |
| REACTOME_RESPIRATORY_E... | 78  | 0.00943  | 0.000618  | 0.0776 | 0.45164  | 1 | REACTOME_RESPIRATORY_ELECTRON_TRANSPORT_ATP_SYNTHESIS_BY_CHEMIOSMOTIC_COUPLING_AND_HEAT_PRODUCTION_BY_UNCOUPLING_PROTEINS |
| REACTOME_FORMATION_OF_... | 31  | -0.0815  | -0.00337  | 0.121  | 0.75037  | 1 | REACTOME_FORMATION_OF_THE_HIV1_EARLY_ELONGATION_COMPLEX                                                                   |
| REACTOME_RAF_MAP_KINAS... | 10  | -0.505   | -0.0119   | 0.222  | 0.98839  | 1 | REACTOME_RAF_MAP_KINASE_CASCADE                                                                                           |
| REACTOME_VIRAL_MESSENG... | 14  | -0.0727  | -0.00202  | 0.182  | 0.65547  | 1 | REACTOME_VIRAL_MESSENGER_RNA_SYNTHESIS                                                                                    |
| REACTOME_LATE_PHASE_OF... | 98  | -0.0135  | -0.00099  | 0.0727 | 0.57357  | 1 | REACTOME_LATE_PHASE_OF_HIV_LIFE_CYCLE                                                                                     |
| REACTOME_SHC_MEDIATED_... | 15  | -0.262   | -0.00755  | 0.174  | 0.93412  | 1 | REACTOME_SHC_MEDIATED_SIGNALLING                                                                                          |
| REACTOME_INTERACTIONS_... | 30  | -0.0198  | -0.000808 | 0.131  | 0.56019  | 1 | REACTOME_INTERACTIONS_OF_VPR_WITH_HOST_CELLULAR_PROTEINS                                                                  |
| REACTOME_FORMATION_OF_... | 13  | 0.136    | 0.00364   | 0.169  | 0.21161  | 1 | REACTOME_FORMATION_OF_ATP_BY_CHEMIOSMOTIC_COUPLING                                                                        |

|                            |     |          |           |        |          |   |                                                                                                                    |
|----------------------------|-----|----------|-----------|--------|----------|---|--------------------------------------------------------------------------------------------------------------------|
| REACTOME_APC_C_CDH1_ME...  | 62  | 0.187    | 0.0109    | 0.0943 | 0.023642 | 1 | REACTOME_APC_C_CDH1_MEDIATED_DEGRADATION_OF_CDC20_AND_OTHER_APC_C_CDH1_TARGETED_PROTEIN_S_IN_LATE_MITOSIS_EARLY_G1 |
| REACTOME_ACTIVATION_OF...  | 35  | -0.0444  | -0.00195  | 0.118  | 0.64675  | 1 | REACTOME_ACTIVATION_OF_ATR_IN_RESPONSE_TO_REPLICATION_STRESS                                                       |
| REACTOME_UNWINDING_OF_DNA  | 11  | 0.251    | 0.00619   | 0.199  | 0.10409  | 1 | REACTOME_UNWINDING_OF_DNA                                                                                          |
| REACTOME_APC_C_CDC20_M...  | 63  | 0.188    | 0.0111    | 0.094  | 0.023023 | 1 | REACTOME_APC_C_CDC20_MEDIATED_DEGRADATION_OF_MITOTIC_PROTEINS                                                      |
| REACTOME_GLUCURONIDATION   | 18  | 0.0714   | 0.00225   | 0.251  | 0.38817  | 1 | REACTOME_GLUCURONIDATION                                                                                           |
| REACTOME_AUTODEGRADATI...  | 54  | 0.223    | 0.0122    | 0.103  | 0.014889 | 1 | REACTOME_AUTODEGRADATION_OF_CDH1_BY_CDH1_APC_C                                                                     |
| REACTOME_MYD88_MAL_CAS...  | 75  | -0.00562 | -0.000361 | 0.0828 | 0.52705  | 1 | REACTOME_MYD88_MAL_CASCADE_INITIATED_ON_PLASMA_MEMBRANE                                                            |
| REACTOME_INNATE_IMMUNE...  | 243 | 0.0223   | 0.00256   | 0.0506 | 0.32996  | 1 | REACTOME_INNATE_IMMUNE_SYSTEM                                                                                      |
| REACTOME_REGULATION_OF...  | 27  | -0.149   | -0.00575  | 0.139  | 0.85846  | 1 | REACTOME_REGULATION_OF_GLUKOKINASE_BY_GLUKOKINASE_REGULATORY_PROTEIN                                               |
| REACTOME_MITOTIC_PROMET... | 82  | -0.0212  | -0.00142  | 0.0843 | 0.59932  | 1 | REACTOME_MITOTIC_PROMETAPHASE                                                                                      |
| REACTOME_SCF_BETA_TRCP...  | 48  | 0.0974   | 0.00501   | 0.105  | 0.17781  | 1 | REACTOME_SCF_BETA_TRCP_MEDIATED_DEGRADATION_OF_EMI1                                                                |
| REACTOME_LIPOPROTEIN_M...  | 28  | 0.0667   | 0.00262   | 0.142  | 0.31916  | 1 | REACTOME_LIPOPROTEIN_METABOLISM                                                                                    |
| REACTOME_G1_S_SPECIFIC...  | 16  | 0.271    | 0.00806   | 0.167  | 0.051977 | 1 | REACTOME_G1_S_SPECIFIC_TRANSCRIPTION                                                                               |
| REACTOME_THE_ROLE_OF_N...  | 26  | -0.168   | -0.00638  | 0.148  | 0.87207  | 1 | REACTOME_THE_ROLE_OF_NEF_IN_HIV1_REPLICATION_AND_DISEASE_PATHOGENESIS                                              |
| REACTOME_CHYLOMICRON_M...  | 16  | 0.138    | 0.0041    | 0.189  | 0.23247  | 1 | REACTOME_CHYLOMICRON_MEDIATED_LIPID_TRANSPORT                                                                      |
| REACTOME_SIGNALING_BY_...  | 59  | -0.0728  | -0.00415  | 0.0986 | 0.76982  | 1 | REACTOME_SIGNALING_BY_TGF_BETA_RECEPTOR_COMPLEX                                                                    |
| REACTOME_ACTIVATED_TLR...  | 85  | 0.0108   | 0.000738  | 0.079  | 0.44571  | 1 | REACTOME_ACTIVATED_TLR4_SIGNALLING                                                                                 |
| REACTOME_IMMUNE_SYSTEM     | 841 | 0.0414   | 0.00873   | 0.0273 | 0.064944 | 1 | REACTOME_IMMUNE_SYSTEM                                                                                             |
| REACTOME_BINDING_AND_E...  | 4   | -0.314   | -0.00467  | 0.397  | 0.78524  | 1 | REACTOME_BINDING_AND_ENTRY_OF_HIV_VIRION                                                                           |
| REACTOME_CYTOSOLIC_SUL...  | 13  | 0.13     | 0.00349   | 0.232  | 0.28741  | 1 | REACTOME_CYTOSOLIC_SULFONATION_OF_SMALL_MOLECULES                                                                  |

|                             |     |         |           |        |          |   |                                                                                   |
|-----------------------------|-----|---------|-----------|--------|----------|---|-----------------------------------------------------------------------------------|
| REACTOME_INTEGRATION_O...   | 8   | 0.168   | 0.00354   | 0.243  | 0.24415  | 1 | REACTOME_INTEGRATION_OF_PROVIRUS                                                  |
| REACTOME_GLUTATHIONE_C...   | 23  | 0.0526  | 0.00188   | 0.173  | 0.38078  | 1 | REACTOME_GLUTATHIONE_CONJUGATION                                                  |
| REACTOME_COMPLEMENT_CA...   | 29  | -0.016  | -0.000639 | 0.159  | 0.53988  | 1 | REACTOME_COMPLEMENT_CASCADE                                                       |
| REACTOME_PHASE_II_CONJ...   | 68  | 0.0556  | 0.00341   | 0.103  | 0.29469  | 1 | REACTOME_PHASE_II_CONJUGATION                                                     |
| REACTOME_MTORC1_MEDIAT...   | 11  | 0.261   | 0.00644   | 0.203  | 0.09945  | 1 | REACTOME_MTORC1_MEDIATED_SIGNALLING                                               |
| REACTOME_TOLL_RECEPTOR...   | 106 | 0.043   | 0.00328   | 0.0713 | 0.27315  | 1 | REACTOME_TOLL_RECEPTOR_CASCADES                                                   |
| REACTOME_ACTIVATION_OF...   | 16  | -0.0137 | -0.000406 | 0.191  | 0.52849  | 1 | REACTOME_ACTIVATION_OF_BH3_ONLY_PROTEINS                                          |
| REACTOME_GLUCOSE_METAB...   | 59  | 0.00836 | 0.000477  | 0.0991 | 0.46638  | 1 | REACTOME_GLUCOSE_METABOLISM                                                       |
| REACTOME_RNA_POL_III_C...   | 17  | -0.198  | -0.00606  | 0.164  | 0.88531  | 1 | REACTOME_RNA_POL_III_CHAIN_ELONGATION                                             |
| REACTOME_VOLTAGE_GATED...   | 42  | -0.0247 | -0.00119  | 0.14   | 0.57017  | 1 | REACTOME_VOLTAGE_GATED_POTASSIUM_CHANNELS                                         |
| REACTOME_ADAPTIVE_IMMU...   | 485 | 0.0767  | 0.0124    | 0.0352 | 0.014584 | 1 | REACTOME_ADAPTIVE_IMMUNE_SYSTEM                                                   |
| REACTOME_NOD1_2_SIGNAL...   | 27  | 0.0744  | 0.00287   | 0.14   | 0.29734  | 1 | REACTOME_NOD1_2_SIGNALING_PATHWAY                                                 |
| REACTOME_CYTOKINE_SIGN...   | 250 | 0.0216  | 0.00252   | 0.0495 | 0.33122  | 1 | REACTOME_CYTOKINE_SIGNALING_IN_IMMUNE_SYSTEM                                      |
| REACTOME_MEIOTIC_SYNAPSI... | 57  | 0.0748  | 0.00419   | 0.0964 | 0.21892  | 1 | REACTOME_MEIOTIC_SYNAPSI...                                                       |
| REACTOME_ANTIGEN_PRESE...   | 20  | 0.323   | 0.0107    | 0.17   | 0.028891 | 1 | REACTOME_ANTIGEN_PRESENTATION_FOLDING_ASSEMBLY_AND_PEPTIDE_LOADING_OF_CLASS_I_MHC |
| REACTOME_THE_NLRP3_INF...   | 10  | 0.4     | 0.0094    | 0.221  | 0.035153 | 1 | REACTOME_THE_NLRP3_INFLAMMASOME                                                   |
| REACTOME_CLASS_I_MHC_M...   | 223 | 0.069   | 0.00762   | 0.0517 | 0.090865 | 1 | REACTOME_CLASS_I_MHC_MEDIATED_ANTIGEN_PROCESSING_PRESENTATION                     |
| REACTOME_NONSENSE_MEDI...   | 98  | 0.134   | 0.00983   | 0.0701 | 0.0281   | 1 | REACTOME_NONSENSE_MEDIATED_DECAY_ENHANCED_BY_THE_EXON_JUNCTION_COMPLEX            |
| REACTOME_PIP3_ACTIVATE...   | 26  | 0.203   | 0.00769   | 0.138  | 0.070401 | 1 | REACTOME_PIP3_ACTIVATES_AKT_SIGNALING                                             |
| REACTOME_ANTIGEN_PROCE...   | 189 | 0.0449  | 0.00457   | 0.0554 | 0.20889  | 1 | REACTOME_ANTIGEN_PROCESSING_UBIQUITINATION_PROTEASOME_DEGRADATION                 |
| REACTOME_TANDEM_PORE_D...   | 12  | 0.214   | 0.00552   | 0.259  | 0.20378  | 1 | REACTOME_TANDEM_PORE_DOMAIN_POTASSIUM_CHANNELS                                    |
| REACTOME_INFLAMMASOMES      | 15  | 0.287   | 0.00828   | 0.18   | 0.055605 | 1 | REACTOME_INFLAMMASOMES                                                            |
| REACTOME_POTASSIUM_CHA...   | 97  | -0.025  | -0.00183  | 0.0864 | 0.61386  | 1 | REACTOME_POTASSIUM_CHANNELS                                                       |

|                           |     |         |           |        |          |   |                                                                                                           |
|---------------------------|-----|---------|-----------|--------|----------|---|-----------------------------------------------------------------------------------------------------------|
| REACTOME_NUCLEOTIDE_BI... | 41  | 0.15    | 0.00715   | 0.112  | 0.089222 | 1 | REACTOME_NUCLEOTIDE_BINDING_DOMAIN_LEUCINE_R<br>ICH_REPEAT_CONTAINING_RECEPTOR_NLR_SIGNALING_P<br>ATHWAYS |
| REACTOME_INWARDLY_RECT... | 31  | -0.0854 | -0.00353  | 0.142  | 0.7269   | 1 | REACTOME_INWARDLY_RECTIFYING_K_CHANNELS                                                                   |
| REACTOME_AMYLOIDS         | 63  | -0.0403 | -0.00237  | 0.107  | 0.64735  | 1 | REACTOME_AMYLOIDS                                                                                         |
| REACTOME_PACKAGING_OF_... | 36  | 0.177   | 0.00788   | 0.121  | 0.071539 | 1 | REACTOME_PACKAGING_OF_TELOMERE_ENDS                                                                       |
| REACTOME_TELOMERE_MAIN... | 60  | -0.022  | -0.00126  | 0.0912 | 0.59517  | 1 | REACTOME_TELOMERE_MAINTENANCE                                                                             |
| REACTOME_PLATELET_ACTI... | 188 | 0.0713  | 0.00724   | 0.0553 | 0.09854  | 1 | REACTOME_PLATELET_ACTIVATION_SIGNALING_AND_AG<br>GREGATION                                                |
| REACTOME_REMOVAL_OF_TH... | 10  | -0.306  | -0.0072   | 0.223  | 0.91543  | 1 | REACTOME_REMOVAL_OF_THE_FLAP_INTERMEDIATE_FR<br>OM_THE_C_STRAND                                           |
| REACTOME_CREATION_OF_C... | 8   | 0.157   | 0.00331   | 0.379  | 0.33896  | 1 | REACTOME_CREATION_OF_C4_AND_C2_ACTIVATORS                                                                 |
| REACTOME_INITIAL_TRIGG... | 13  | 0.159   | 0.00426   | 0.253  | 0.26532  | 1 | REACTOME_INITIAL_TRIGGERING_OF_COMPLEMENT                                                                 |
| REACTOME_EXTENSION_OF_... | 24  | -0.286  | -0.0104   | 0.139  | 0.98013  | 1 | REACTOME_EXTENSION_OF_TELOMERES                                                                           |
| REACTOME_G2_M_CHECKPOINTS | 41  | -0.0116 | -0.000553 | 0.112  | 0.54139  | 1 | REACTOME_G2_M_CHECKPOINTS                                                                                 |
| REACTOME_G2_M_DNA_DAMA... | 9   | 0.0418  | 0.000934  | 0.314  | 0.44698  | 1 | REACTOME_G2_M_DNA_DAMAGE_CHECKPOINT                                                                       |
| REACTOME_S_PHASE          | 103 | 0.0435  | 0.00328   | 0.0698 | 0.26644  | 1 | REACTOME_S_PHASE                                                                                          |
| REACTOME_SCFSKP2_MEDIA... | 52  | 0.169   | 0.00907   | 0.103  | 0.049242 | 1 | REACTOME_SCFSKP2_MEDIATED_DEGRADATION_OF_P27<br>_P21                                                      |
| REACTOME_TRYPTOPHAN_CA... | 11  | 0.0312  | 0.000771  | 0.253  | 0.45082  | 1 | REACTOME_TRYPTOPHAN_CATABOLISM                                                                            |
| REACTOME_DNA_STRAND_EL... | 28  | -0.085  | -0.00334  | 0.123  | 0.75545  | 1 | REACTOME_DNA_STRAND_ELONGATION                                                                            |
| REACTOME_RESOLUTION_OF... | 12  | 0.0721  | 0.00186   | 0.202  | 0.3602   | 1 | REACTOME_RESOLUTION_OF_AP_SITES_VIA_THE_SINGLE<br>_NUCLEOTIDE_REPLACEMENT_PATHWAY                         |
| REACTOME_FGFR_LIGAND_B... | 22  | -0.195  | -0.00681  | 0.174  | 0.86975  | 1 | REACTOME_FGFR_LIGAND_BINDING_AND_ACTIVATION                                                               |
| REACTOME_CHOLESTEROL_B... | 20  | -0.0652 | -0.00217  | 0.174  | 0.64619  | 1 | REACTOME_CHOLESTEROL_BIOSYNTHESIS                                                                         |
| REACTOME_APOBEC3G_MEDI... | 5   | -0.0317 | -0.000528 | 0.273  | 0.54634  | 1 | REACTOME_APOBEC3G_MEDIATED_RESISTANCE_TO_HIV<br>1_INFECTION                                               |
| REACTOME_GAP_JUNCTION_... | 25  | 0.103   | 0.00384   | 0.161  | 0.2605   | 1 | REACTOME_GAP_JUNCTION_TRAFFICKING                                                                         |
| REACTOME_FGFR2C_LIGAND... | 12  | -0.182  | -0.00468  | 0.228  | 0.78749  | 1 | REACTOME_FGFR2C_LIGAND_BINDING_AND_ACTIVATIO<br>N                                                         |

|                           |     |          |           |        |          |   |                                                            |
|---------------------------|-----|----------|-----------|--------|----------|---|------------------------------------------------------------|
| REACTOME_METABOLISM_OF... | 13  | -0.109   | -0.00291  | 0.189  | 0.71679  | 1 | REACTOME_METABOLISM_OF_PORPHYRINS                          |
| REACTOME_FGFR4_LIGAND_... | 12  | -0.32    | -0.00824  | 0.227  | 0.92026  | 1 | REACTOME_FGFR4_LIGAND_BINDING_AND_ACTIVATION               |
| REACTOME_VIF_MEDIATED_... | 48  | 0.111    | 0.00573   | 0.107  | 0.14833  | 1 | REACTOME_VIF_MEDIATED_DEGRADATION_OF_APOBEC<br>3G          |
| REACTOME_SIGNALING_BY_... | 107 | -0.00322 | -0.000247 | 0.0735 | 0.51744  | 1 | REACTOME_SIGNALING_BY_FGFR                                 |
| REACTOME_DIGESTION_OF_... | 9   | 0.508    | 0.0113    | 0.291  | 0.04025  | 1 | REACTOME_DIGESTION_OF_DIETARY_CARBOHYDRATE                 |
| REACTOME_FGFR1_LIGAND_... | 14  | -0.171   | -0.00476  | 0.208  | 0.79436  | 1 | REACTOME_FGFR1_LIGAND_BINDING_AND_ACTIVATION               |
| REACTOME_GAP_JUNCTION_... | 16  | 0.174    | 0.00517   | 0.212  | 0.20652  | 1 | REACTOME_GAP_JUNCTION_ASSEMBLY                             |
| REACTOME_SYNTHESIS_OF_... | 16  | 0.00207  | 6.15E-05  | 0.168  | 0.49509  | 1 | REACTOME_SYNTHESIS_OF_GLYCOSYLPHOSPHATIDYLINO<br>SITOL_GPI |
| REACTOME_RNA_POL_I_TRA... | 22  | -0.212   | -0.00739  | 0.141  | 0.93336  | 1 | REACTOME_RNA_POL_I_TRANSCRIPTION_INITIATION                |
| REACTOME_PYRIMIDINE_ME... | 24  | -0.198   | -0.00721  | 0.163  | 0.88805  | 1 | REACTOME_PYRIMIDINE_METABOLISM                             |
| REACTOME_INTRINSIC_PAT... | 28  | 0.0629   | 0.00248   | 0.144  | 0.33101  | 1 | REACTOME_INTRINSIC_PATHWAY_FOR_APOPTOSIS                   |
| REACTOME_PI3K_CASCADE     | 68  | -0.101   | -0.00616  | 0.0927 | 0.86098  | 1 | REACTOME_PI3K_CASCADE                                      |
| REACTOME_APOPTOTIC_EXE... | 48  | -0.28    | -0.0144   | 0.108  | 0.99522  | 1 | REACTOME_APOPTOTIC_EXECUTION_PHASE                         |
| REACTOME_SHC_RELATED_E... | 17  | -0.272   | -0.00833  | 0.167  | 0.94778  | 1 | REACTOME_SHC_RELATED_EVENTS                                |
| NABA_COLLAGENS            | 42  | 0.0443   | 0.00213   | 0.13   | 0.36631  | 1 | NABA_COLLAGENS                                             |
| NABA_ECM_GLYCOPROTEINS    | 186 | -0.0228  | -0.00231  | 0.0593 | 0.64996  | 1 | NABA_ECM_GLYCOPROTEINS                                     |
| NABA_ECM_REGULATORS       | 233 | -0.0349  | -0.00394  | 0.0563 | 0.73241  | 1 | NABA_ECM_REGULATORS                                        |
| NABA_ECM_AFFILIATED       | 164 | 0.00836  | 0.000793  | 0.0653 | 0.44907  | 1 | NABA_ECM_AFFILIATED                                        |
| NABA_PROTEOGLYCANS        | 33  | 0.0414   | 0.00177   | 0.143  | 0.38651  | 1 | NABA_PROTEOGLYCANS                                         |
| NABA_SECRETED_FACTORS     | 323 | 0.0789   | 0.0105    | 0.049  | 0.053823 | 1 | NABA_SECRETED_FACTORS                                      |
| NABA_CORE_MATRISOME       | 261 | -0.00483 | -0.000576 | 0.0511 | 0.53766  | 1 | NABA_CORE_MATRISOME                                        |
| NABA_MATRISOME_ASSOCIATED | 720 | 0.0253   | 0.00495   | 0.0326 | 0.21916  | 1 | NABA_MATRISOME_ASSOCIATED                                  |
| NABA_BASEMENT_MEMBRANES   | 37  | 0.184    | 0.00831   | 0.142  | 0.098283 | 1 | NABA_BASEMENT_MEMBRANES                                    |
| NABA_MATRISOME            | 981 | 0.0169   | 0.00382   | 0.0278 | 0.27169  | 1 | NABA_MATRISOME                                             |
